# Supplementary material for: “Expression of concern”: publication bias for positive preclinical cardioprotection studies
Source: Springer Nature journal article supplement (doi:10.1007/s00395-024-01050-4), 2024-04-26
Supplement: MOESM1 [file 27021906]

# **“Expression of concern” – publication bias for positive preclinical cardioprotection studies**

**Andreas Skyschally<sup>1</sup>, Petra Kleinbongard<sup>1</sup>, Markus Neuhäuser<sup>2</sup>, Gerd Heusch<sup>1</sup>**

**<sup>1</sup>Institute for Pathophysiology, West German Heart and Vascular Center, University Duisburg-Essen, Essen, Germany**

**<sup>2</sup>Department of Mathematics and Technology, Koblenz University of Applied Sciences, Rhein-Ahr-Campus, Remagen, Germany**

## **Supplemental data**

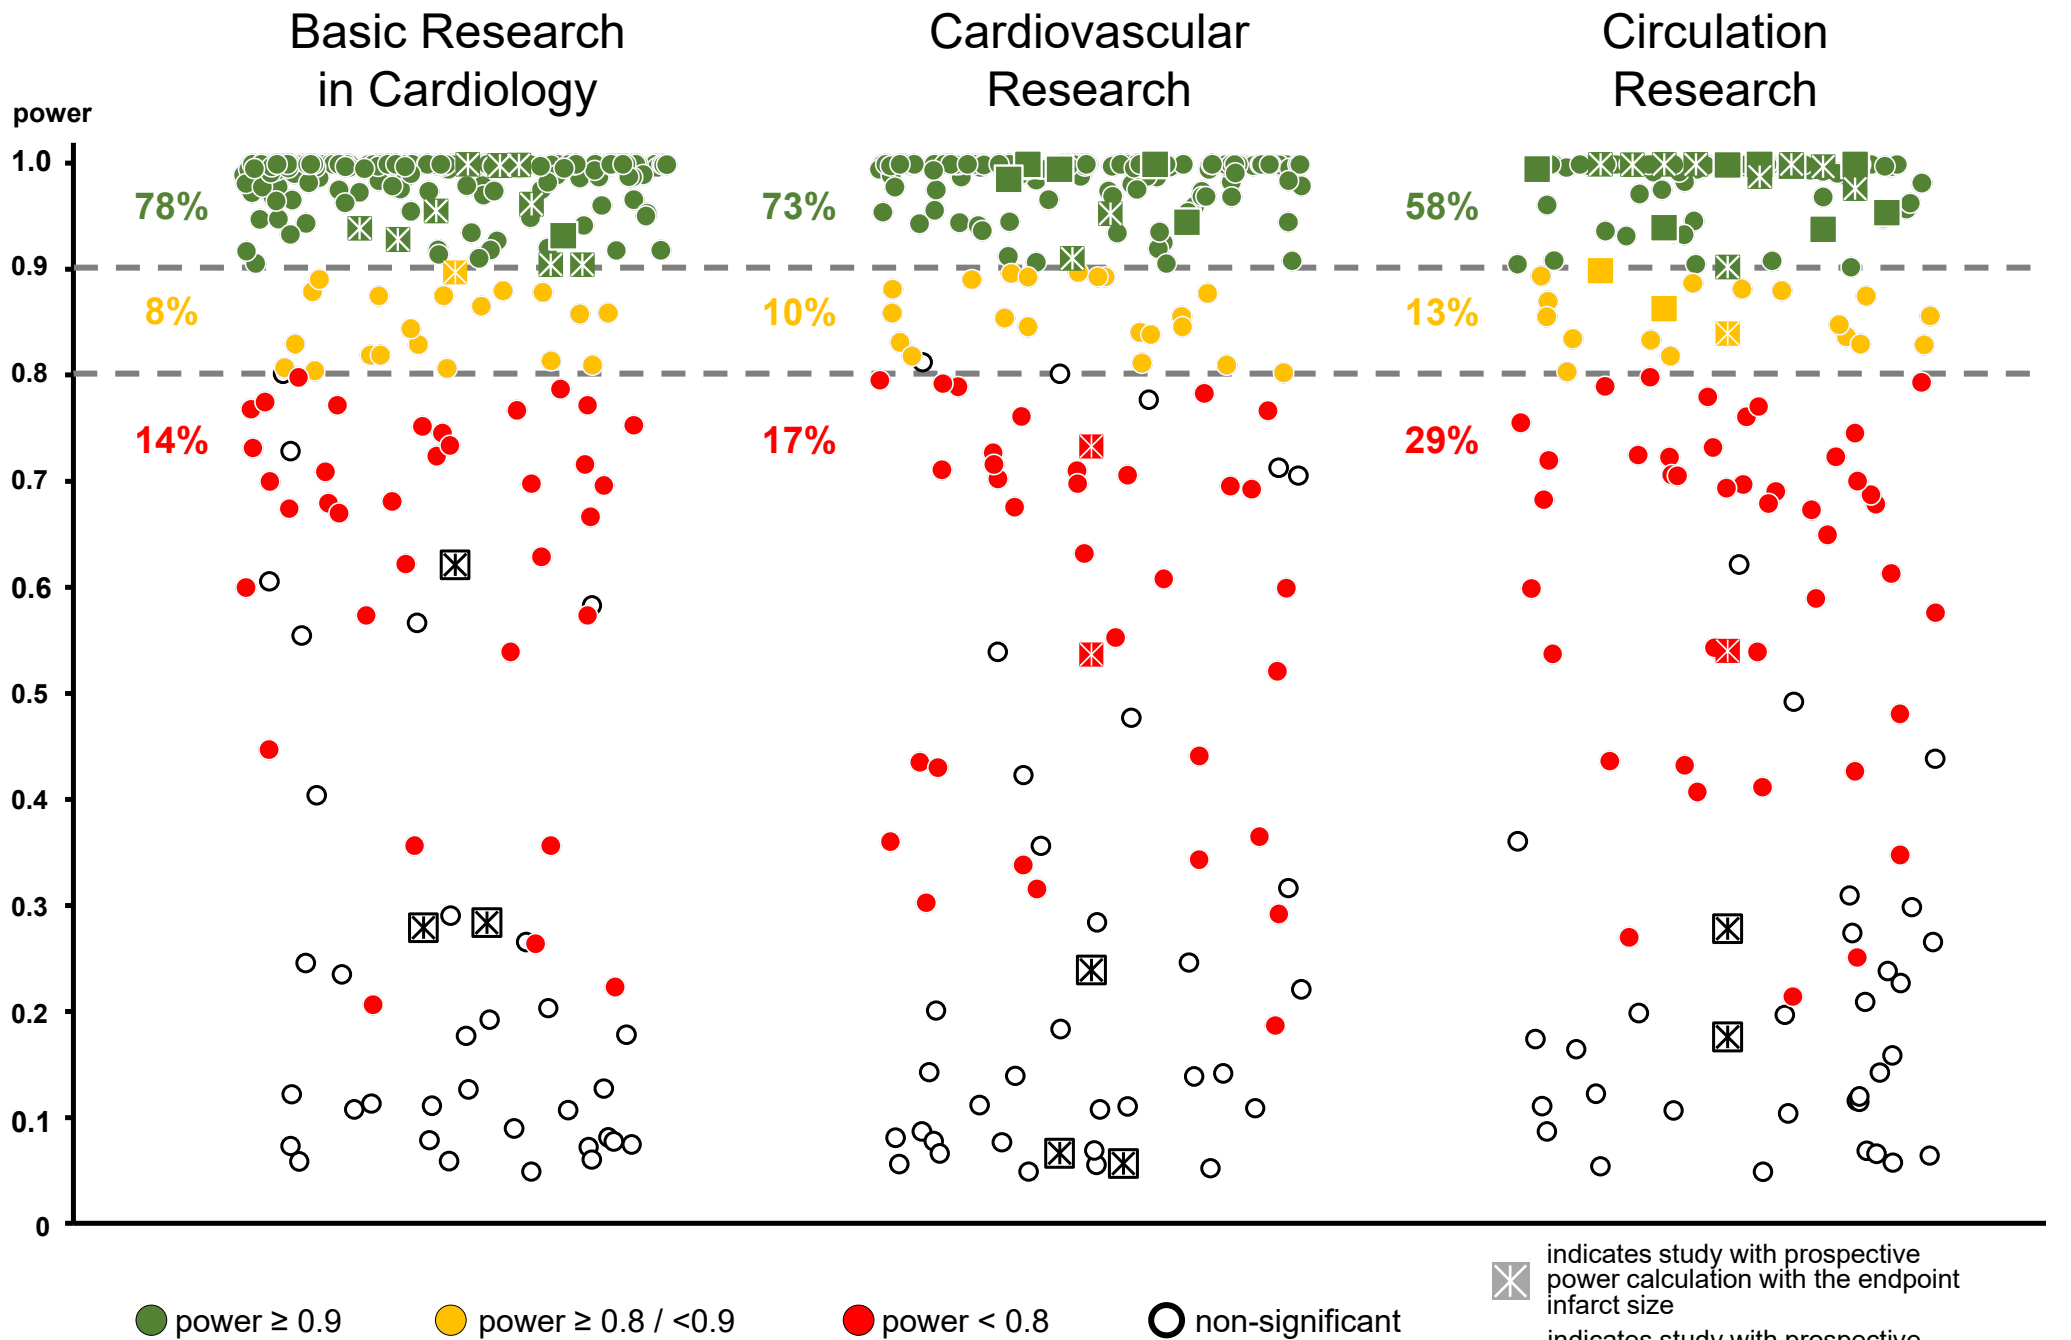

Suppl. Figure 1

 indicates study with prospective power calculation with the endpoint infarct size  
 indicates study with prospective power calculation with unspecified endpoint or endpoint other than infarct size

**Suppl. Figure 1:** Scatterplot of the retrospectively calculated statistical power for a significance level of  $\alpha = 0.05$  of infarct size data sets which were published between 2013 and 2023 in preclinical papers in Basic Research in Cardiology, Cardiovascular Research and Circulation Research. Only infarct size measured by TTC-staining, MRI, SPECT, or histologic techniques and the most reasonable primary infarct size data sets were considered. Closed symbols indicate data with reported statistical significance, open symbols without statistical significance. Square symbols indicate data from studies with a prospective power calculation.

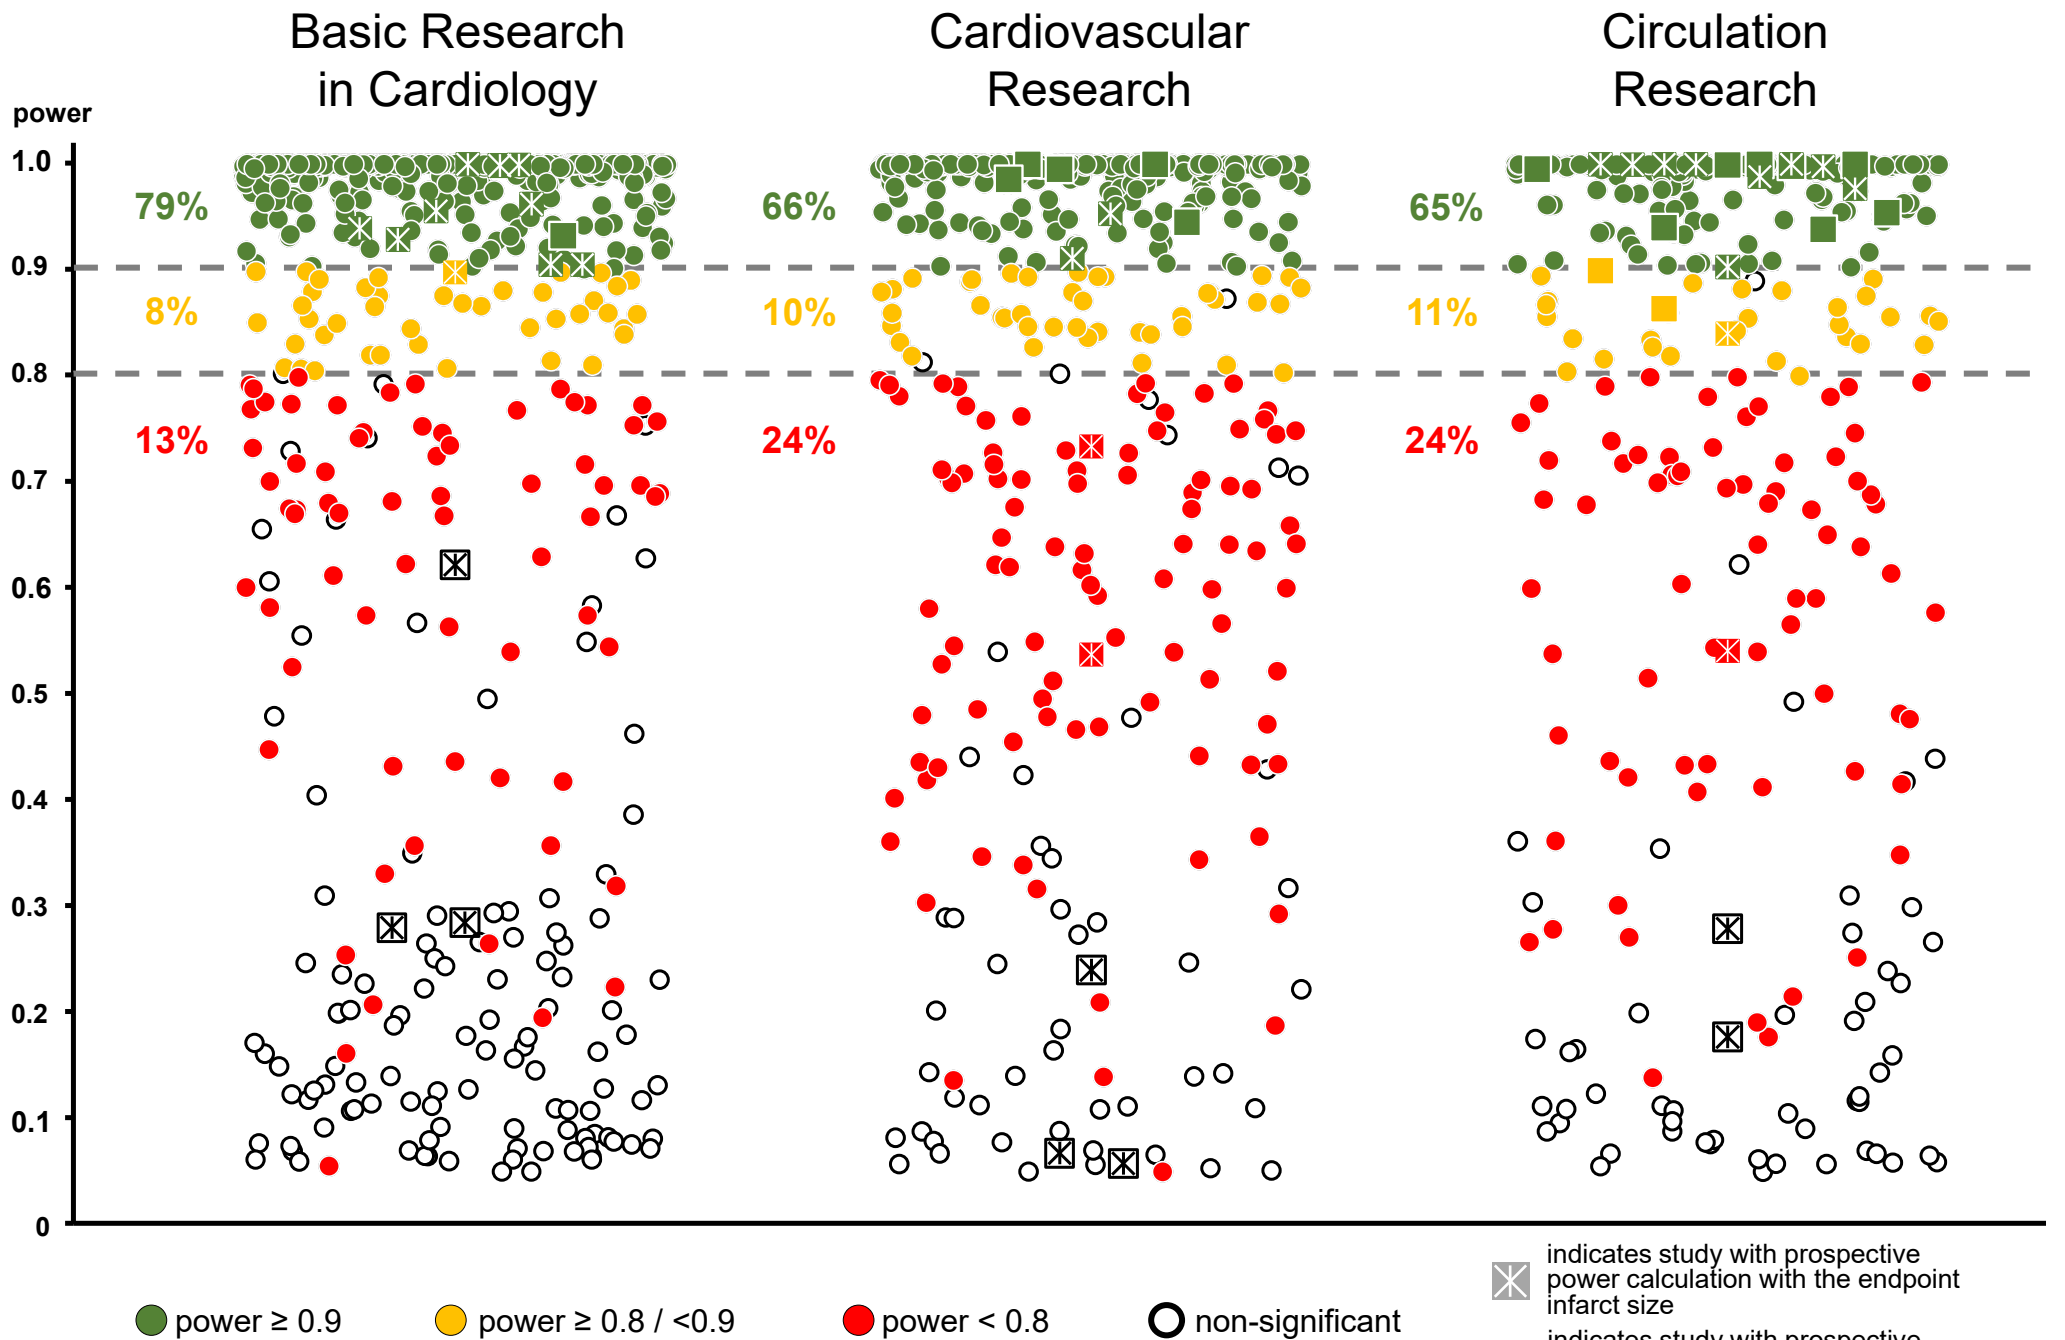

Suppl. Figure 2

**Suppl. Figure 2:** Scatterplot of the retrospectively calculated statistical power for a significance level of  $\alpha = 0.05$  of infarct size data sets which were published between 2013 and 2023 in preclinical papers in Basic Research in Cardiology, Cardiovascular Research and Circulation Research. All available data sets on infarct size were used. Closed symbols indicate data with reported statistical significance, open symbols without statistical significance. Square symbols indicate data from studies with a prospective power calculation.

Basic Research in Cardiology

| ref. | species | I/R timing       | intervention                                | method | effect | p-value | power | note |
|------|---------|------------------|---------------------------------------------|--------|--------|---------|-------|------|
| [1]  | mouse   | 60 min / 24 h    | WT vs CypD KO                               | TTC    | ↓      | <0.01   | 1.00  |      |
| [1]  | mouse   | 60 min / 24 h    | WT vs NIM811                                | TTC    | ↓      | <0.01   | 0.70  |      |
| [1]  | mouse   | 60 min / 24 h    | WT vs TUDCA                                 | TTC    | ↓      | <0.01   | 0.70  |      |
| [1]  | mouse   | 60 min / 24 h    | WT vs NIM811+TUDCA                          | TTC    | →      | n.s.    | 0.11  |      |
| [2]  | mouse   | 30 min / 120 min | con vs PoCo                                 | TTC    | ↓      | <0.05   | *     |      |
| [2]  | mouse   | 30 min / 120 min | con vs iliomast                             | TTC    | ↓      | <0.05   | *     |      |
| [2]  | mouse   | 30 min / 120 min | con vs PoCo (CypD KO)                       | TTC    | →      | n.s.    | *     |      |
| [2]  | mouse   | 30 min / 120 min | con vs iliomast (CypD KO)                   | TTC    | ↓      | <0.05   | *     |      |
| [2]  | mouse   | 30 min / 120 min | con vs iliomast                             | TTC    | ↓      | <0.05   | *     |      |
| [2]  | mouse   | 30 min / 120 min | con vs iliomast (CypD KO)                   | TTC    | ↓      | <0.05   | *     |      |
| [3]  | rabbit  | 30 min / 120 min | pla vs RIPC                                 | TTC    | ↓      | 0.019   | 0.94  |      |
| [4]  | rat     | 35 min / 60 min  | con vs RIC                                  | TTC    | ↓      | <0.001  | 1.00  |      |
| [4]  | rat     | 35 min / 60 min  | RIC vs AMD+RIC                              | TTC    | ↑      | <0.05   | 0.76  |      |
| [5]  | rat     | 30 min / 120 min | con vs IPC                                  | TTC    | ↓      | <0.05   | 1.00  |      |
| [5]  | rat     | 30 min / 120 min | con vs CsA                                  | TTC    | ↓      | <0.05   | 1.00  |      |
| [5]  | rat     | 30 min / 120 min | con vs isoflurane                           | TTC    | ↓      | <0.05   | 1.00  |      |
| [5]  | rat     | 30 min / 120 min | con vs PoCo                                 | TTC    | →      | n.s.    | 0.58  |      |
| [5]  | rat     | 30 min / 120 min | con vs post-CsA                             | TTC    | →      | n.s.    | 0.61  |      |
| [5]  | rat     | 30 min / 120 min | con vs post-isoflurane                      | TTC    | ↓      | <0.05   | 1.00  |      |
| [6]  | rat     | 30 min / 120 min | sedentary vs exercise                       | TTC    | ↓      | <0.05   | 0.91  |      |
| [6]  | rat     | 30 min / 120 min | exercise vs exercise+LNAME                  | TTC    | ↑      | <0.05   | 0.44  |      |
| [6]  | rat     | 30 min / 120 min | sedentary vs exercise                       | TTC    | ↓      | <0.05   | 0.89  |      |
| [6]  | rat     | 30 min / 120 min | exercise vs exercise+BH4                    | TTC    | ↑      | <0.05   | 1.00  |      |
| [7]  | rat     | 30 min / 120 min | veh vs incision                             | TTC    | ↓      | <0.001  | 1.00  |      |
| [7]  | rat     | 30 min / 120 min | veh vs bradykinin                           | TTC    | ↓      | <0.001  | 1.00  |      |
| [7]  | rat     | 30 min / 120 min | veh vs ePKC                                 | TTC    | ↓      | <0.001  | 1.00  |      |
| [7]  | rat     | 30 min / 120 min | TAT vs TAT+incision                         | TTC    | ↓      | <0.001  | 1.00  |      |
| [7]  | rat     | 30 min / 120 min | veh vs ePKC                                 | TTC    | ↓      | <0.05   | 1.00  |      |
| [7]  | rat     | 30 min / 120 min | veh+T10 vs gammaPKC                         | TTC    | ↓      | <0.001  | 1.00  |      |
| [7]  | rat     | 30 min / 120 min | ePKC during I vs incision after I           | TTC    | ↑      | <0.001  | 1.00  |      |
| [7]  | rat     | 30 min / 120 min | incision during I vs incision after I       | TTC    | ↑      | <0.001  | 1.00  |      |
| [8]  | mouse   | 40 min / 60 min  | con vs GW3965                               | TTC    | ↓      | <0.01   | 1.00  |      |
| [9]  | mouse   | 45 min / 24 h    | WT vs famotidine                            | TTC    | ↓      | <0.05   | 0.73  |      |
| [9]  | mouse   | 45 min / 24 h    | WT vs amthamine                             | TTC    | ↑      | <0.05   | 1.00  |      |
| [9]  | mouse   | 45 min / 24 h    | WT+amthamine vs WT+amthamine+famotidine     | TTC    | ↓      | <0.05   | 0.94  |      |
| [9]  | mouse   | 45 min / 24 h    | WT vs H2R KO                                | TTC    | ↓      | <0.05   | 0.99  |      |
| [9]  | mouse   | perm / 24 h      | WT vs famotidine                            | TTC    | ↓      | <0.05   | 0.79  |      |
| [9]  | mouse   | perm / 24 h      | WT vs amthamine                             | TTC    | ↑      | <0.05   | 1.00  |      |
| [9]  | mouse   | perm / 24 h      | WT+amthamine vs WT+amthamine+famotidine     | TTC    | ↓      | <0.05   | 0.93  |      |
| [9]  | mouse   | perm / 24 h      | WT vs H2R KO                                | TTC    | ↓      | <0.05   | 0.90  |      |
| [10] | mouse   | 60 min / 24 h    | WT con vs WT1668                            | TTC    | ↓      | <0.05   | 1.00  |      |
| [10] | mouse   | 60 min / 24 h    | WT DGalN vs WT1668                          | TTC    | ↓      | <0.05   | 1.00  |      |
| [10] | mouse   | 60 min / 24 h    | WT H154 vs WT1668                           | TTC    | ↓      | <0.05   | 1.00  |      |
| [10] | mouse   | 60 min / 24 h    | WT 1612 vs WT1668                           | TTC    | ↓      | <0.05   | 1.00  |      |
| [10] | mouse   | 60 min / 24 h    | WT IL10ab DGalN vs WT1668                   | TTC    | ↓      | <0.05   | 1.00  |      |
| [10] | mouse   | 60 min / 24 h    | WT IL10ab 1668 vs WT1668                    | TTC    | ↓      | <0.05   | 1.00  |      |
| [10] | mouse   | 60 min / 24 h    | TLR9-D D-GalN vs WT1668                     | TTC    | ↓      | <0.05   | 0.99  |      |
| [10] | mouse   | 60 min / 24 h    | TLR9-D 1668 vs WT1668                       | TTC    | ↓      | <0.05   | 0.90  |      |
| [10] | mouse   | 60 min / 24 h    | WTcon vs WT IL10ab DGalN                    | TTC    | ↑      | <0.05   | 1.00  |      |
| [10] | mouse   | 60 min / 24 h    | WTcon vs WT IL10ab 1668                     | TTC    | ↑      | <0.05   | 0.99  |      |
| [10] | mouse   | 60 min / 24 h    | WTcon vs TLR9-D D-GalN                      | TTC    | ↓      | <0.05   | 0.90  |      |
| [11] | mouse   | 30 min / 120 min | con vs PoCo                                 | TTC    | ↓      | <0.05   | 1.00  |      |
| [11] | mouse   | 30 min / 120 min | con vs Bay60                                | TTC    | ↓      | <0.05   | 0.99  |      |
| [11] | mouse   | 30 min / 120 min | con vs MitoSNO                              | TTC    | ↓      | <0.05   | 1.00  |      |
| [11] | mouse   | 30 min / 120 min | con vs Bay58                                | TTC    | ↓      | <0.05   | 1.00  |      |
| [11] | mouse   | 30 min / 120 min | con vs sildenafil                           | TTC    | ↓      | <0.05   | 1.00  |      |
| [11] | mouse   | 30 min / 120 min | con vs PoCo +QDO                            | TTC    | ↓      | <0.05   | 1.00  |      |
| [11] | mouse   | 30 min / 120 min | con vs PoCo (PGI KO)                        | TTC    | ↓      | <0.05   | 1.00  |      |
| [11] | mouse   | 30 min / 120 min | con vs Bay60 (PGI KO)                       | TTC    | ↓      | <0.05   | 1.00  |      |
| [11] | mouse   | 30 min / 120 min | con vs MitoSNO (PGI KO)                     | TTC    | ↓      | <0.05   | 1.00  |      |
| [11] | mouse   | 30 min / 120 min | con vs Bay58 (PGI KO)                       | TTC    | →      | n.s.    | 0.08  |      |
| [11] | mouse   | 30 min / 120 min | con vs sildenafil (PGI KO)                  | TTC    | →      | n.s.    | 0.26  |      |
| [11] | mouse   | 30 min / 120 min | con vs PoCo +QDO (PGI KO)                   | TTC    | ↓      | <0.05   | 1.00  |      |
| [12] | mouse   | 30 min / 24 h    | con vs Notch1 KO                            | TTC    | ↑      | <0.01   | 0.98  |      |
| [12] | mouse   | 30 min / 24 h    | veh vs EUK 134                              | TTC    | ↓      | <0.01   | 0.97  |      |
| [12] | mouse   | 30 min / 24 h    | veh vs JAGGD1                               | TTC    | ↓      | <0.01   | 0.92  |      |
| [13] | mouse   | 40 min / 60 min  | con vs diabetic                             | TTC    | ↑      | <0.01   | 1.00  |      |
| [13] | mouse   | 40 min / 60 min  | diabetic vs diabetic+insulin                | TTC    | ↓      | <0.01   | 0.87  |      |
| [13] | mouse   | 40 min / 60 min  | diabetic+insulin vs diabetic+insulin+comp C | TTC    | ↑      | <0.01   | 0.96  |      |
| [13] | mouse   | 40 min / 60 min  | WT vs APN -/-                               | TTC    | ↑      | <0.01   | 1.00  |      |
| [13] | mouse   | 40 min / 60 min  | WT+insulin vs APN -/- +insulin              | TTC    | ↑      | <0.01   | 0.88  |      |
| [14] | rat     | 30 min / 120 min | con vs PoCo                                 | NTB    | ↓      | <0.01   | 1.00  |      |
| [14] | rat     | 30 min / 120 min | con vs Diazoxide                            | NTB    | ↓      | <0.01   | 1.00  |      |
| [15] | mouse   | 40 min / 60 min  | fl/fl+oil vs cre/fl+4-OHT                   | TTC    | ↓      | <0.0001 | 1.00  |      |
| [15] | mouse   | 40 min / 60 min  | fl/fl+4-OHT vs cre/fl+4-OHT                 | TTC    | ↓      | <0.0001 | 1.00  |      |
| [15] | mouse   | 40 min / 60 min  | cre/fl+oil vs cre/fl+4-OHT                  | TTC    | ↓      | <0.0001 | 1.00  |      |
| [15] | mouse   | 40 min / 60 min  | (fl/fl+oil) ctrl vs IPC                     | TTC    | ↓      | <0.05   | 0.96  |      |
| [15] | mouse   | 40 min / 60 min  | (fl/fl+oil) ctrl vs DZX                     | TTC    | ↓      | <0.05   | 0.93  |      |
| [15] | mouse   | 40 min / 60 min  | (fl/fl+4-OHT) ctrl vs IPC                   | TTC    | ↓      | <0.05   | 0.96  |      |
| [15] | mouse   | 40 min / 60 min  | (fl/fl+4-OHT) vs DZX                        | TTC    | ↓      | <0.05   | 0.77  |      |
| [15] | mouse   | 40 min / 60 min  | (cre/fl+oil ctrl) vs IPC                    | TTC    | ↓      | <0.05   | 0.77  |      |
| [15] | mouse   | 40 min / 60 min  | (cre/fl+oil ctrl) vs DZX                    | TTC    | →      | n.s.    | 0.19  |      |
| [15] | mouse   | 40 min / 60 min  | (ctrl) fl/fl+oil vs cre/fl+4-OHT            | TTC    | ↓      | <0.001  | 1.00  |      |
| [15] | mouse   | 40 min / 60 min  | (ctrl) fl/fl+4-OHT vs cre/fl+4-OHT          | TTC    | ↓      | <0.001  | 1.00  |      |
| [15] | mouse   | 40 min / 60 min  | (ctrl) cre/fl+oil vs cre/fl+4-OHT           | TTC    | ↓      | <0.001  | 1.00  |      |

|      |        |                     |                                                                  |       |   |        |      |
|------|--------|---------------------|------------------------------------------------------------------|-------|---|--------|------|
| [15] | mouse  | 40 min / 60 min     | (IPC ) fl/fl+oil vs cre/fl+4-OHT                                 | TTC   | ↓ | <0.001 | 1.00 |
| [15] | mouse  | 40 min / 60 min     | (IPC ) fl/fl+4-OHT vs cre/fl+4-OHT                               | TTC   | ↓ | <0.001 | 0.87 |
| [15] | mouse  | 40 min / 60 min     | (IPC ) cre/fl+oil vs cre/fl+4-OHT                                | TTC   | ↓ | <0.001 | 1.00 |
| [15] | mouse  | 40 min / 60 min     | (DZX) fl/fl+oil vs cre/fl+4-OHT                                  | TTC   | ↓ | <0.001 | 1.00 |
| [15] | mouse  | 40 min / 60 min     | (DZX) fl/fl+4-OHT vs cre/fl+4-OHT                                | TTC   | ↓ | <0.001 | 0.67 |
| [15] | mouse  | 40 min / 60 min     | (DZX) cre/fl+oil vs cre/fl+4-OHT                                 | TTC   | ↓ | <0.001 | 1.00 |
| [16] | mouse  | 30 min / 24 h       | con vs ctrp9                                                     | TTC   | ↓ | <0.01  | 1.00 |
| [17] | rat    | 30 min / 24 h       | veh vs GIK                                                       | TTC   | ↓ | <0.05  | 0.99 |
| [17] | rat    | 30 min / 24 h       | GK vs GIK                                                        | TTC   | ↓ | <0.05  | 1.00 |
| [17] | rat    | 30 min / 24 h       | (GIK) NDRG2 scramble vs NDRG2 KO                                 | TTC   | ↑ | <0.05  | 0.97 |
| [18] | mouse  | 30 min / 120 min    | con vs GAP19                                                     | TTC   | ↓ | <0.05  | 0.60 |
| [18] | mouse  | 30 min / 120 min    | con vs GAP19i130A                                                | TTC   | → | n.s.   | 0.20 |
| [19] | rat    | 60 min / 120 min    | con vs vagal stimulation                                         | TTC   | ↓ | <0.01  | 0.98 |
| [20] | mouse  | 45 min / 24 h       | con vs BRL37344                                                  | TTC   | ↓ | <0.05  | 0.77 |
| [20] | mouse  | 45 min / 2 h        | con vs BRL37344 (WT)                                             | TTC   | ↓ | <0.05  | 0.69 |
| [20] | mouse  | 45 min / 2 h        | con vs BRL37344 (CypD KO)                                        | TTC   | → | n.s.   | 0.07 |
| [20] | mouse  | 45 min / 2 h        | con (WT) vs BRL 37344 (CypD KO)                                  | TTC   | ↓ | <0.05  | 0.69 |
| [20] | pig    | 60 min / 7 d        | con vs BRL37344                                                  | MRI   | ↓ | <0.05  | 0.71 |
| [21] | mouse  | 30 min / 60 min     | PBS vs RIPC                                                      | TTC   | ↓ | <0.05  | 0.86 |
| [21] | mouse  | 30 min / 60 min     | PBS vs miR-Co+RIPC                                               | TTC   | ↓ | <0.01  | 0.97 |
| [21] | mouse  | 30 min / 60 min     | PBS vs anti-miR144+RIPC                                          | TTC   | → | n.s.   | 0.20 |
| [21] | mouse  | 30 min / 60 min     | PBS vs anti-miR144                                               | TTC   | → | n.s.   | 0.09 |
| [21] | mouse  | 30 min / 60 min     | PBS vs miR-Co                                                    | TTC   | → | n.s.   | 0.73 |
| [21] | mouse  | 30 min / 60 min     | PBS vs miR144 dy1                                                | TTC   | ↓ | <0.05  | 0.96 |
| [21] | mouse  | 30 min / 60 min     | PBS vs miR144 dy3                                                | TTC   | ↓ | <0.05  | 1.00 |
| [22] | mouse  | 30 min / 24 h       | con vs NRLP3 siRNA                                               | TTC   | ↓ | <0.05  | 0.78 |
| [22] | mouse  | 30 min / 24 h       | con vs BAY 117082                                                | TTC   | ↓ | <0.05  | 0.81 |
| [23] | rat    | 30 min / 240 min    | con vs HPC                                                       | TTC   | ↓ | <0.05  | 1.00 |
| [23] | rat    | 30 min / 240 min    | capzasepine vs HPC+capsacepine                                   | TTC   | ↓ | <0.05  | 0.97 |
| [23] | rat    | 30 min / 240 min    | HPC vs HPC+capsacepine                                           | TTC   | ↑ | <0.05  | 0.20 |
| [24] | rabbit | 30 min / 120 min    | (rabbit plasma dialysate) sham vs li-RIPC                        | TTC   | ↓ | <0.01  | 0.81 |
| [24] | rabbit | 30 min / 120 min    | (rabbit plasma dialysate) sham vs Tens                           | TTC   | ↓ | <0.01  | 0.99 |
| [24] | mouse  | 30 min / 60 min     | (human plasma dialysate) pre li-IPC vs post-li-IPC               | TTC   | ↓ | <0.01  | 1.00 |
| [24] | mouse  | 30 min / 60 min     | (human plasma dialysate) pre TENS vs post-TENS                   | TTC   | ↓ | <0.01  | 0.98 |
| [24] | mouse  | 30 min / 60 min     | (human plasma dialysate) pre TENS vs post-TENS                   | TTC   | ↓ | <0.01  | 0.98 |
| [24] | mouse  | 30 min / 60 min     | (human plasma dialysate) pre TENS vs pre TENS+naloxone           | TTC   | ↑ | <0.05  | 0.95 |
| [24] | mouse  | 30 min / 60 min     | (human plasma dialysate) pre TENS+naloxone vs post-TENS+naloxone | TTC   | → | n.s.   | 0.23 |
| [25] | mouse  | 60 min / 24 h       | BC+/EC+ vs BC-/EC+                                               | TTC   | ↑ | <0.01  | 0.98 |
| [25] | mouse  | 60 min / 24 h       | ETU- vs ETU+ (BC+/EC+)                                           | TTC   | ↑ | <0.001 | 1.00 |
| [25] | mouse  | 60 min / 24 h       | ETU- (BC+/EC+) vs ETU- (BC-/BC+)                                 | TTC   | ↑ | <0.05  | 1.00 |
| [26] | mouse  | perm / 3 wk         | veh vs anti IL6                                                  | TTC   | → | n.s.   | 0.08 |
| [26] | mouse  | perm / 3 wk         | veh vs anti IL6                                                  | Histo | ↑ | <0.05  | 0.85 |
| [27] | mouse  | 30 min / 60 min     | WT vs WT+PoCo                                                    | NTB   | ↓ | <0.01  | 0.98 |
| [27] | mouse  | 30 min / 60 min     | WT vs Mel OE                                                     | NTB   | ↓ | <0.05  | 0.95 |
| [27] | mouse  | 30 min / 60 min     | WT vs Mel OE+PoCo                                                | NTB   | ↓ | <0.05  | 1.00 |
| [27] | mouse  | 30 min / 60 min     | Mel OE vs Mel OE+PoCo                                            | NTB   | → | n.s.   | 0.30 |
| [27] | mouse  | 30 min / 60 min     | Mel OE vs Mel OE+wortmannin                                      | NTB   | ↑ | <0.05  | 0.53 |
| [27] | mouse  | 30 min / 60 min     | Mel OE vs Mel OE+U0126                                           | NTB   | ↑ | <0.05  | 0.55 |
| [28] | mouse  | 30 min / 120 min    | WT vs GAB1 KO                                                    | TTC   | ↑ | <0.05  | 0.89 |
| [29] | rat    | perm / 1 mo         | con vs cardiospheres                                             | Histo | ↓ | <0.05  | 0.75 |
| [29] | rat    | perm / 6 mo         | con vs cardiospheres                                             | Histo | ↓ | <0.05  | 0.16 |
| [30] | mouse  | 60 min / 24 h       | WT vs IFR9 KO                                                    | TTC   | ↓ | <0.05  | 1.00 |
| [30] | mouse  | 60 min / 24 h       | WT vs IFR9 OE                                                    | TTC   | ↑ | <0.05  | 0.99 |
| [31] | mouse  | perm / 1 wk         | DKK3 +/- vs DKK3 -/-                                             | Histo | ↑ | <0.05  | 0.99 |
| [31] | mouse  | perm / 1 wk         | WT vs csOE DKK3                                                  | Histo | ↓ | <0.05  | 0.99 |
| [32] | rat    | 20/45 min / 120 min | i20 vs i45                                                       | TTC   | ↑ | <0.05  | 0.99 |
| [32] | rat    | 30 min / 120 min    | con vs PoCo 10s                                                  | TTC   | ↓ | <0.01  | 1.00 |
| [32] | rat    | 30 min / 120 min    | con vs PoCo 10min                                                | TTC   | ↓ | <0.05  | 0.99 |
| [32] | rat    | 30 min / 120 min    | con vs PoCo 10s                                                  | TTC   | ↓ | <0.01  | 1.00 |
| [32] | rat    | 30 min / 120 min    | con vs PoCo 10 min                                               | TTC   | ↓ | <0.05  | 0.98 |
| [32] | rat    | 30 min / 120 min    | con vs PoCo 30 min                                               | TTC   | ↓ | <0.01  | 1.00 |
| [32] | rat    | 30 min / 120 min    | con vs PoCo 45 min                                               | TTC   | ↓ | <0.01  | 1.00 |
| [32] | rat    | 30 min / 120 min    | con vs PoCo 60 min                                               | TTC   | → | n.s.   | 0.66 |
| [32] | rat    | 30 min / 120 min    | con vs PoCo 10 s                                                 | TTC   | ↓ | <0.01  | 1.00 |
| [32] | rat    | 30 min / 120 min    | con vs PoCo 10 min                                               | TTC   | ↓ | <0.01  | 1.00 |
| [32] | rat    | 30 min / 120 min    | PoCo 10s vs PoCo 10 s+PD                                         | TTC   | ↑ | <0.01  | 1.00 |
| [32] | rat    | 30 min / 120 min    | PoCo 10 s vs PoCo 10 s+LY                                        | TTC   | ↑ | <0.01  | 1.00 |
| [32] | rat    | 30 min / 120 min    | PoCo 10 s vs PoCo 10 s+AG                                        | TTC   | → | n.s.   | 0.09 |
| [32] | rat    | 30 min / 120 min    | PoCo 10min vs PoCo 10 min+PD                                     | TTC   | → | n.s.   | 0.29 |
| [32] | rat    | 30 min / 120 min    | PoCo 10 min vs PoCo 10 min+LY                                    | TTC   | → | n.s.   | 0.31 |
| [32] | rat    | 30 min / 120 min    | PoCo 10 min vs PoCo 10 min+AG                                    | TTC   | → | n.s.   | 0.15 |
| [32] | rat    | 30 min / 120 min    | con vs PoCo 10 s                                                 | TTC   | ↓ | <0.01  | 1.00 |
| [32] | rat    | 30 min / 120 min    | con vs PoCo 10 min                                               | TTC   | ↓ | <0.01  | 0.99 |
| [32] | rat    | 30 min / 120 min    | con vs PoCo 30 min                                               | TTC   | ↓ | <0.01  | 1.00 |
| [32] | rat    | 30 min / 120 min    | con vs PoCo 45 min                                               | TTC   | ↓ | <0.01  | 1.00 |
| [32] | rat    | 30 min / 120 min    | PoCo 10 s vs PoCo 10 s+5HD                                       | TTC   | ↑ | <0.05  | 0.93 |
| [32] | rat    | 30 min / 120 min    | PoCo 10 min vs PoCo 10 min+5HD                                   | TTC   | ↑ | <0.05  | 0.90 |
| [32] | rat    | 30 min / 120 min    | PoCo 30 min vs PoCo 30 min+5HD                                   | TTC   | → | n.s.   | 0.13 |
| [32] | rat    | 30 min / 120 min    | PoCo 45 min vs PoCo 45 min+5HD                                   | TTC   | → | n.s.   | 0.07 |
| [33] | mouse  | perm / 3 d          | WT vs p66shc KO                                                  | Histo | → | n.s.   | 0.18 |
| [34] | rat    | 30 min / 24 h       | con vs PKG Ia                                                    | TTC   | ↓ | <0.05  | 1.00 |
| [34] | rat    | 30 min / 24 h       | PKG Ia+PAG vs PKG-Ia                                             | TTC   | ↓ | <0.05  | 1.00 |
| [34] | rat    | 30 min / 24 h       | K390A vs PKG-Ia                                                  | TTC   | ↓ | <0.05  | 1.00 |
| [34] | rat    | 30 min / 24 h       | PAG vs PKG-Ia                                                    | TTC   | ↓ | <0.05  | 1.00 |
| [34] | rat    | 30 min / 24 h       | PKG-Ia+KT5823 at reperfusion vs PKG-Ia                           | TTC   | ↓ | <0.05  | 0.85 |
| [34] | rat    | 30 min / 24 h       | KT5823 at reperfusion vs PKG-Ia                                  | TTC   | ↓ | <0.05  | 1.00 |
| [34] | rat    | 30 min / 24 h       | con vs PKG-Ia+KT5823 at reperfusion                              | TTC   | ↓ | <0.05  | 0.61 |
| [34] | rat    | 30 min / 24 h       | PKG Ia vs PKG-Ia+KT5823 at reperfusion                           | TTC   | ↑ | <0.05  | 0.85 |

|      |           |                   |                                                          |       |   |        |      |
|------|-----------|-------------------|----------------------------------------------------------|-------|---|--------|------|
| [34] | rat       | 30 min / 24 h     | PKG Ia+PAG vs PKG-Ia+KT5823 at reperfusion               | TTC   | ↓ | <0.05  | 0.93 |
| [34] | rat       | 30 min / 24 h     | K390A vs PKG-Ia+KT5823 at reperfusion                    | TTC   | ↓ | <0.05  | 0.56 |
| [34] | rat       | 30 min / 24 h     | PAG vs PKG-Ia+KT5823 at reperfusion                      | TTC   | ↓ | <0.05  | 0.97 |
| [34] | rat       | 30 min / 24 h     | KT5823 at reperfusion vs PKG-Ia+KT at reperfusion        | TTC   | ↓ | <0.05  | 0.94 |
| [35] | mouse     | 30 min / 60 min   | C57 vs db/db DMSO                                        | TTC   | ↑ | <0.05  | 1.00 |
| [35] | mouse     | 30 min / 60 min   | C57 vs db/db RAPA                                        | TTC   | ↓ | <0.001 | 1.00 |
| [35] | mouse     | 30 min / 60 min   | db/db DMSO vs db/db RAPA                                 | TTC   | ↓ | <0.001 | 1.00 |
| [35] | mouse     | 30 min / 60 min   | DMSO vs RAPA                                             | TTC   | ↓ | <0.001 | 1.00 |
| [35] | mouse     | 30 min / 60 min   | RAPA vs DMSO(STAT3 def)                                  | TTC   | ↑ | <0.001 | 1.00 |
| [36] | mouse     | 30 min / 48 h     | WT vs miR155 -/-                                         | TTC   | ↓ | <0.05  | 0.68 |
| [37] | rat       | 30 min / 90 min   | con vs prolame                                           | TTC   | ↓ | <0.05  | 0.97 |
| [37] | rat       | 30 min / 90 min   | con vs 17β-estradiol                                     | TTC   | ↓ | <0.05  | 0.22 |
| [37] | rat       | 30 min / 90 min   | prolame vs prolame+LNAME                                 | TTC   | ↑ | <0.05  | 1.00 |
| [37] | rat       | 30 min / 90 min   | prolame vs 17β-estradiol                                 | TTC   | ↑ | <0.05  | 0.25 |
| [38] | mouse     | perm / 4 wk       | WT vs CARD3 KO                                           | Histo | ↓ | <0.05  | 1.00 |
| [38] | mouse     | perm / 4 wk       | WT vs CARD3 OE                                           | Histo | ↑ | <0.05  | 1.00 |
| [39] | mouse     | perm / 24 h       | WT vs csOE MCP1                                          | TTC   | → | n.s.   | 0.13 |
| [39] | mouse     | perm / 28 d       | WT vs csOE MCP1                                          | Histo | ↓ | <0.05  | 1.00 |
| [40] | mouse     | perm / 4 wk       | con vs exendin                                           | TTC   | → | n.s.   | 0.08 |
| [41] | mouse     | 35 min / 60 min   | WT vs MLS-STAT3E                                         | TTC   | ↓ | <0.05  | 1.00 |
| [41] | mouse     | 30 min / 24 h min | WT vs MLS-STAT3E                                         | TTC   | ↓ | <0.05  | 1.00 |
| [42] | mouse     | 30 min / 60 min   | euglycemia vs hyperglycemia                              | TTC   | ↑ | <0.05  | 0.99 |
| [42] | mouse     | 30 min / 60 min   | SPLX (EG vs HG)                                          | TTC   | → | n.s.   | 0.20 |
| [42] | mouse     | 30 min / 60 min   | SPLX+SPAT (EG vs HG)                                     | TTC   | ↑ | <0.05  | 1.00 |
| [42] | mouse     | 30 min / 60 min   | SPLX+SPAT EG vs SPLX+HGSPAT+EG                           | TTC   | ↑ | <0.05  | 0.89 |
| [43] | mouse     | 45 min / 60 min   | WT vs IB-MECA                                            | TTC   | ↓ | <0.05  | 0.98 |
| [43] | mouse     | 45 min / 60 min   | WT vs A3AR KO                                            | TTC   | ↓ | <0.05  | 0.82 |
| [43] | mouse     | 45 min / 60 min   | WT vs A3AR KO+IB-MECA                                    | TTC   | ↓ | <0.05  | 1.00 |
| [43] | mouse     | 45 min / 60 min   | B6/B6 vs B6/B6+IB-MECA                                   | TTC   | ↓ | <0.05  | 1.00 |
| [43] | mouse     | 45 min / 60 min   | A2A KO/B6 vs B6/B6+IB-MECA                               | TTC   | ↓ | <0.05  | 1.00 |
| [43] | mouse     | 45 min / 60 min   | A2A KO/B6*IB-MECA vs B6/B6+IB-MECA                       | TTC   | ↓ | <0.05  | 0.99 |
| [44] | pig       | 45 min / 120 min  | con vs vns                                               | TTC   | ↓ | <0.05  | 0.68 |
| [45] | woodchuck | 60 min / 120 min  | summer pla vs summer IPC                                 | TTC   | ↓ | <0.05  | 0.97 |
| [45] | woodchuck | 60 min / 120 min  | summer pla vs winter IPC (room temp)                     | TTC   | ↓ | <0.05  | 1.00 |
| [45] | woodchuck | 60 min / 120 min  | summer pla vs winter IPC (hibernation)                   | TTC   | ↓ | <0.05  | 1.00 |
| [45] | woodchuck | 60 min / 120 min  | summer pla vs winter+IPC                                 | TTC   | ↓ | <0.05  | 1.00 |
| [45] | woodchuck | 60 min / 120 min  | winter+L-NA vs winter (room temp)                        | TTC   | ↓ | <0.05  | 1.00 |
| [45] | woodchuck | 60 min / 120 min  | winter+L-NA vs winter (hibernation)                      | TTC   | ↓ | <0.05  | 1.00 |
| [45] | woodchuck | 60 min / 120 min  | winter+L-NA vs winter+IPC                                | TTC   | ↓ | <0.05  | 1.00 |
| [46] | rat       | 30 min / 120 min  | con vs cangrelor                                         | TTC   | ↓ | <0.001 | 1.00 |
| [46] | rat       | 30 min / 120 min  | con vs endo III 4 mg pre                                 | TTC   | ↓ | <0.001 | 1.00 |
| [46] | rat       | 30 min / 120 min  | con vs endo III+cangrelor                                | TTC   | ↓ | <0.005 | 1.00 |
| [46] | rat       | 30 min / 120 min  | cangrelor vs endo III+cangrelor                          | TTC   | ↓ | <0.001 | 0.98 |
| [46] | rat       | 30 min / 120 min  | endo III 4 mg pre vs endo III+cangrelor                  | TTC   | ↓ | <0.001 | 0.99 |
| [46] | rat       | 30 min / 120 min  | con vs endo III 4 mg at rep                              | TTC   | ↓ | <0.001 | 0.99 |
| [46] | rat       | 30 min / 120 min  | con vs endo III 8 mg at rep                              | TTC   | ↓ | <0.001 | 1.00 |
| [46] | rat       | 30 min / 120 min  | con vs endo III 8 mg at rep+cangrelor                    | TTC   | ↓ | <0.001 | 1.00 |
| [46] | rat       | 30 min / 120 min  | con vs endo III 8 mg 10 min rep                          | TTC   | ↓ | <0.001 | 1.00 |
| [46] | rat       | 30 min / 120 min  | cangrelor vs endo III 8 mg at rep+cangrelor              | TTC   | ↓ | <0.001 | 1.00 |
| [46] | rat       | 30 min / 120 min  | endo III 4 mg rep vs endo III 8 mg rep+cangrelor         | TTC   | ↓ | <0.001 | 1.00 |
| [46] | rat       | 30 min / 120 min  | endo III 8 mg rep vs endo III 8 mg rep+cangrelor         | TTC   | ↓ | <0.002 | 1.00 |
| [46] | rat       | 30 min / 120 min  | con vs endo III 4 mg pre+wortmannin                      | TTC   | ↓ | <0.001 | 1.00 |
| [46] | rat       | 30 min / 120 min  | con vs endo III 4 mg pre+SPT                             | TTC   | ↓ | <0.001 | 1.00 |
| [46] | rat       | 30 min / 120 min  | endo III 4 mg pre vs endo III 4 mg pre+PD96059           | TTC   | ↑ | <0.001 | 1.00 |
| [46] | rat       | 30 min / 120 min  | con vs DNASE 16                                          | TTC   | ↓ | <0.001 | 1.00 |
| [46] | rat       | 30 min / 120 min  | con vs DNASE 32                                          | TTC   | ↓ | <0.001 | 1.00 |
| [46] | rat       | 30 min / 120 min  | con vs DNASE+cangrelor                                   | TTC   | ↓ | <0.001 | 1.00 |
| [46] | rat       | 30 min / 120 min  | con vs DNASE+PD                                          | TTC   | ↓ | <0.001 | 1.00 |
| [46] | rat       | 30 min / 120 min  | con vs DNASE+endo III                                    | TTC   | ↓ | <0.001 | 1.00 |
| [46] | rat       | 30 min / 120 min  | DNASE+cangrelor vs cangrelor                             | TTC   | ↑ | 0.006  | 0.98 |
| [46] | rat       | 30 min / 120 min  | DNASE+cangrelor vs DNASE16                               | TTC   | ↑ | <0.02  | 0.77 |
| [46] | rat       | 30 min / 120 min  | DNASE+cangrelor vs DNASE32                               | TTC   | ↑ | <0.02  | 0.98 |
| [46] | rat       | 30 min / 120 min  | DNASE+endo III vs DNASE16                                | TTC   | ↑ | <0.01  | 0.81 |
| [46] | rat       | 30 min / 120 min  | DNASE+endo III vs DNASE32                                | TTC   | ↑ | <0.01  | 0.98 |
| [46] | rat       | 30 min / 120 min  | DNASE+endo III vs Endo III                               | TTC   | ↑ | <0.01  | 0.99 |
| [46] | rat       | 30 min / 120 min  | con vs DNASE333                                          | TTC   | ↓ | <0.001 | 1.00 |
| [46] | rat       | 30 min / 120 min  | con vs mtDNA                                             | TTC   | ↑ | <0.001 | 1.00 |
| [47] | pig       | 60 min / 180 min  | con vs CsA                                               | TTC   | ↓ | 0.008  | 0.99 |
| [47] | pig       | 60 min / 180 min  | con vs PoCo                                              | TTC   | ↓ | 0.016  | 0.92 |
| [48] | pig       | 90 min / 21 d     | normal cholesterol diet vs high cholesterol diet         | TTC   | ↑ | <0.05  | 0.57 |
| [48] | mouse     | 60 min / 0 min    | WT vs LRP5-/-                                            | Histo | ↑ | <0.05  | 0.67 |
| [48] | mouse     | 60 min / 0 min    | WT vs LRP5-/-                                            | Histo | ↑ | <0.05  | 0.42 |
| [49] | dog       | 60 min / 600 min  | non.hypoxic vs intermittent hypoxia                      | TTC   | ↓ | <0.001 | 1.00 |
| [49] | dog       | 60 min / 600 min  | intermittent hypoxia vs intermittend hypoxia+naltrindole | TTC   | ↑ | <0.001 | 1.00 |
| [49] | dog       | 60 min / 600 min  | intermittent hypoxia vs intermittend hypoxia+NAC         | TTC   | ↑ | <0.001 | 1.00 |
| [49] | dog       | 60 min / 600 min  | intermittent hypoxia vs uninterrupted hypoxia            | TTC   | ↑ | <0.001 | 1.00 |
| [50] | mouse     | 45 min / 24 h     | con vs DMS                                               | TTC   | ↓ | <0.05  | 0.88 |
| [50] | mouse     | 45 min / 24 h     | con vs DMS+PC61                                          | TTC   | → | n.s.   | 0.20 |
| [50] | mouse     | 45 min / 24 h     | con vs DMS+IgG                                           | TTC   | ↓ | <0.05  | 0.87 |
| [50] | mouse     | 45 min / 24 h     | con vs DMS+LY                                            | TTC   | → | n.s.   | 0.17 |
| [50] | mouse     | 45 min / 24 h     | WT vs RAG2 KO                                            | TTC   | ↓ | <0.05  | 0.88 |
| [50] | mouse     | 45 min / 24 h     | WT vs RAG2 KO+DMS                                        | TTC   | ↓ | <0.05  | 0.95 |
| [50] | mouse     | 45 min / 24 h     | WT vs RAG2 KO+DMS+nonTREGS (wt)                          | TTC   | → | n.s.   | 0.08 |
| [50] | mouse     | 45 min / 24 h     | WT vs RAG2 KO+DMS+nonTREGS (wt) +TREGS (wt)              | TTC   | ↓ | <0.05  | 0.79 |
| [50] | mouse     | 45 min / 24 h     | WT vs RAG2 KO+DMS+TREGS (WT)                             | TTC   | ↓ | <0.05  | 0.94 |
| [50] | mouse     | 45 min / 24 h     | WT vs RAG2 KO +DMS+nonTREGS (wt) +TREGS (AKT1+/-)        | TTC   | → | n.s.   | 0.06 |
| [51] | mouse     | 45 min / 24 h     | WT vs Caspase KO                                         | TTC   | → | n.s.   | 0.13 |
| [52] | mouse     | 25 min / 60 min   | con vs RIPC 2 cyc                                        | TTC   | → | n.s.   | 0.13 |



|      |       |                  |                                                            |       |   |         |      |
|------|-------|------------------|------------------------------------------------------------|-------|---|---------|------|
| [52] | mouse | 25 min / 60 min  | con vs RIPC 4 cyc                                          | TTC   | ↓ | <0.05   | 0.94 |
| [52] | mouse | 25 min / 60 min  | con vs RIPC 6 cyc                                          | TTC   | ↓ | <0.001  | 1.00 |
| [52] | mouse | 25 min / 60 min  | con vs RIPC 8 cyc                                          | TTC   | ↓ | <0.05   | 1.00 |
| [52] | mouse | 25 min / 60 min  | 4 cy vs RIPC 6 cyc                                         | TTC   | → | n.s.    | 0.27 |
| [52] | mouse | 25 min / 60 min  | RIPC 6 cyc vs RIPC 8 cyc                                   | TTC   | → | n.s.    | 0.20 |
| [52] | mouse | 25 min / 60 min  | con vs RIPC 2min occ                                       | TTC   | ↓ | <0.05   | 0.97 |
| [52] | mouse | 25 min / 60 min  | con vs RIPC 5 min occ                                      | TTC   | ↓ | <0.05   | 1.00 |
| [52] | mouse | 25 min / 60 min  | con vs RIPC 10 min occ                                     | TTC   | → | n.s.    | 0.09 |
| [52] | mouse | 25 min / 60 min  | RIPC 2min occ vs RIPC 5min occ                             | TTC   | → | n.s.    | 0.08 |
| [52] | mouse | 25 min / 60 min  | con vs RIPC 4cyc-1limb                                     | TTC   | ↓ | <0.001  | 0.99 |
| [52] | mouse | 25 min / 60 min  | con vs RIPC 4 cyc-2limb                                    | TTC   | ↓ | <0.05   | 0.95 |
| [52] | mouse | 25 min / 60 min  | RIPC 4 cyc-1limb vs RIPC 4 cyc-2limb                       | TTC   | → | n.s.    | 0.07 |
| [52] | mouse | 25 min / 60 min  | con vs RIPC 6cyc-1limb                                     | TTC   | ↓ | <0.001  | 1.00 |
| [52] | mouse | 25 min / 60 min  | con vs RIPC 6cyc-2limb                                     | TTC   | ↓ | <0.0001 | 1.00 |
| [52] | mouse | 25 min / 60 min  | RIPC 6cyc-1limb vs RIPC 6cyc-2limb                         | TTC   | → | n.s.    | 0.25 |
| [52] | mouse | 25 min / 60 min  | con vs RIPC 0.5h delay to isch                             | TTC   | ↓ | <0.001  | 1.00 |
| [52] | mouse | 25 min / 60 min  | con vs RIPC 1.5h delay to isch                             | TTC   | ↓ | <0.0001 | 1.00 |
| [52] | mouse | 25 min / 60 min  | con vs RIPC 2h delay to isch                               | TTC   | → | n.s.    | 0.16 |
| [52] | mouse | 25 min / 60 min  | con vs RIPC 2.5h delay to isch                             | TTC   | → | n.s.    | 0.11 |
| [52] | mouse | 25 min / 60 min  | con vs IPC                                                 | TTC   | ↓ | <0.0001 | 1.00 |
| [53] | mouse | 40 min / 85 min  | con vs HFS (hig-Fat-Sucrose)                               | TTC   | ↑ | <0.05   | 0.97 |
| [53] | mouse | 40 min / 85 min  | HFS vs HFS+exercise                                        | TTC   | ↓ | <0.05   | 0.75 |
| [53] | mouse | 40 min / 120 min | con vs HFS (hig-Fat-Sucrose)                               | TTC   | ↑ | <0.05   | 0.67 |
| [53] | mouse | 40 min / 120 min | HFS vs HFS+exercise                                        | TTC   | ↓ | <0.05   | 0.67 |
| [53] | mouse | 40 min / 120 min | con vs BRL37344 (I3-stim)                                  | TTC   | ↓ | <0.05   | 0.92 |
| [53] | mouse | 40 min / 120 min | con vs HFS                                                 | TTC   | ↑ | <0.05   | 1.00 |
| [53] | mouse | 40 min / 120 min | HFS vs HFS+BRL37344                                        | TTC   | → | n.s.    | 0.12 |
| [53] | mouse | 40 min / 85 min  | HFS vs HFS+1400W (iNOS inh)                                | TTC   | ↓ | <0.05   | 0.93 |
| [54] | mouse | perm / 7 d       | saline vs ROFA (1 mm)                                      | Histo | → | n.s.    | 0.48 |
| [54] | mouse | perm / 7 d       | saline vs ROFA (1.5 mm)                                    | Histo | → | n.s.    | 0.29 |
| [54] | mouse | perm / 7 d       | saline vs ROFA (2 mm)                                      | Histo | ↑ | <0.05   | 1.00 |
| [54] | mouse | perm / 7 d       | saline vs ROFA (2.5 mm)                                    | Histo | → | n.s.    | 0.66 |
| [54] | mouse | perm / 7 d       | saline vs ROFA (3 mm)                                      | Histo | ↑ | <0.05   | 1.00 |
| [55] | rat   | 35 min / 60 min  | con donor hearts vs RIC donor hearts                       | TTC   | ↓ | <0.01   | 0.97 |
| [55] | rat   | 35 min / 60 min  | prp-dialysate (con) vs prp-dialysate (RIC)                 | TTC   | ↓ | <0.01   | 0.99 |
| [55] | rat   | 35 min / 60 min  | ppp-dialysate (con) vs ppp-dialysate (RIC)                 | TTC   | ↓ | <0.001  | 1.00 |
| [55] | rat   | 35 min / 60 min  | sham vagotomy con dialysate vs sham vagotomy+RIC dialysate | TTC   | ↓ | <0.05   | 1.00 |
| [55] | rat   | 35 min / 60 min  | sham vagotomy+con dialysate vs vagotomy+con dialysate      | TTC   | → | n.s.    | 0.57 |
| [55] | rat   | 35 min / 60 min  | sham vagotomy+con dialysate vs vagotomy+RIC dialysate      | TTC   | → | n.s.    | 0.07 |
| [55] | rat   | 35 min / 60 min  | con (dialysate) vs RIC (dialysate)                         | TTC   | ↓ | <0.05   | 1.00 |
| [55] | rat   | 35 min / 60 min  | con (dialysate) vs hexamethonium                           | TTC   | → | n.s.    | 0.06 |
| [55] | rat   | 35 min / 60 min  | con (dialysate) vs RIC+hexamethonium                       | TTC   | → | n.s.    | 0.39 |
| [55] | rat   | 35 min / 60 min  | con (dialysate) vs atropine                                | TTC   | → | n.s.    | 0.16 |
| [55] | rat   | 35 min / 60 min  | con (dialysate) vs RIC+atropine                            | TTC   | → | n.s.    | 0.63 |
| [56] | mouse | 30 min / 180 min | con vs solid lipid nanoparticles                           | TTC   | ↓ | <0.001  | 1.00 |
| [57] | mouse | 40 min / 60 min  | con vs SPLX (40 min I)                                     | TTC   | ↓ | <0.05   | 1.00 |
| [57] | mouse | 50 min / 60 min  | con vs SPLX (50 min I)                                     | TTC   | ↓ | <0.05   | 1.00 |
| [57] | mouse | 40 min / 60 min  | con vs SPLX (40 min I)                                     | TTC   | ↓ | <0.05   | 1.00 |
| [57] | mouse | 40 min / 60 min  | SPLX vs SPLX+SPAT                                          | TTC   | ↑ | <0.05   | 1.00 |
| [57] | mouse | 40 min / 60 min  | con vs SPLX+SPAT                                           | TTC   | → | n.s.    | 0.16 |
| [57] | mouse | 20 min / 60 min  | SPLX vs SPLX+SPAT                                          | TTC   | → | n.s.    | 0.06 |
| [57] | mouse | 20 min / 60 min  | con vs 10-IHH                                              | TTC   | → | n.s.    | 0.20 |
| [57] | mouse | 20 min / 60 min  | con vs 40-IHH                                              | TTC   | ↑ | <0.05   | 1.00 |
| [57] | mouse | 20 min / 60 min  | 10-IHH vs 40-IHH                                           | TTC   | ↑ | <0.05   | 1.00 |
| [57] | mouse | 20 min / 60 min  | 40-IHH vs 40-IHH+SPLX                                      | TTC   | ↓ | <0.05   | 1.00 |
| [57] | mouse | 20 min / 60 min  | 40-IHH+SPLX vs 40-IHH+SPLX+SPAT                            | TTC   | ↑ | <0.05   | 1.00 |
| [57] | mouse | 20 min / 60 min  | 40-IHH (H mgB1- vs H mgB1+)                                | TTC   | ↑ | <0.05   | 1.00 |
| [58] | mouse | 60 min / 24 h    | WT vs SIRT6 +/-                                            | TTC   | ↑ | <0.05   | 0.97 |
| [58] | mouse | 45 min / 60 min  | WT vs SIRT6 +/-                                            | TTC   | ↑ | <0.001  | 1.00 |
| [58] | mouse | 60 min / 24 h    | WT+Ad-null vs SIRT6+/- +Ad-null                            | TTC   | ↑ | <0.001  | 1.00 |
| [58] | mouse | 60 min / 24 h    | WT+Ad-null vs SIRT6+/- +Ad-SIRT6                           | TTC   | ↓ | <0.001  | 1.00 |
| [58] | mouse | 60 min / 24 h    | SIRT6+/- +Ad-null vs SIRT6+/- +Ad-SIRT6                    | TTC   | ↓ | <0.001  | 1.00 |
| [59] | mouse | 30 min / 24 h    | PBS vs mouse EVs baseline                                  | TTC   | ↓ | <0.05   | 1.00 |
| [59] | mouse | 30 min / 24 h    | PBS vs mouse EVs after swimming                            | TTC   | ↓ | <0.05   | 1.00 |
| [59] | mouse | 30 min / 24 h    | PBS vs hum. plasma EVs exercise                            | TTC   | ↓ | <0.05   | 1.00 |
| [60] | mouse | perm / 24 h      | WT vs GLO1 OE                                              | TTC   | → | n.s.    | 0.18 |
| [60] | mouse | perm / 4 wk      | WT vs GLO1 OE                                              | Histo | ↓ | 0.038   | 0.75 |
| [61] | mouse | perm / 21 d      | young vs old (empty-v)                                     | Histo | ↑ | <0.001  | 0.95 |
| [61] | mouse | perm / 21 d      | old (empty V) vs old+GDF11                                 | Histo | ↓ | <0.05   | 0.54 |
| [62] | mouse | 30 min / 120 min | con vs GAP26                                               | TTC   | ↓ | <0.05   | 0.67 |
| [62] | mouse | 30 min / 120 min | con vs GAP19                                               | TTC   | ↓ | <0.05   | 0.62 |
| [62] | mouse | 30 min / 120 min | con vs RRNY                                                | TTC   | ↓ | <0.01   | 0.99 |
| [62] | mouse | 30 min / 120 min | GAP19 vs RRNY                                              | TTC   | ↓ | <0.05   | 0.99 |
| [63] | rat   | 30 min / 60 min  | con vs PoCo                                                | TTC   | ↓ | <0.05   | 1.00 |
| [63] | rat   | 30 min / 60 min  | PoCo vs PoCo+methyl-β cyclodextrin                         | TTC   | ↑ | <0.05   | 0.58 |
| [64] | pig   | 45 min / 1 wk    | con vs 12 min                                              | MRI   | → | n.s.    | 0.29 |
| [64] | pig   | 45 min / 1 wk    | con vs 17 min                                              | MRI   | → | n.s.    | 0.09 |
| [65] | mouse | 45 min / 24 h    | con vs AZP-531                                             | TTC   | ↓ | <0.001  | 0.98 |
| [65] | mouse | 45 min / 24 h    | con vs CsA                                                 | TTC   | ↓ | <0.01   | 0.70 |
| [65] | mouse | 45 min / 24 h    | con vs UAG                                                 | TTC   | ↓ | <0.001  | 1.00 |
| [66] | mouse | 8 h / 0          | MI vs MI+antagomiR143                                      | TTC   | ↓ | <0.01   | 1.00 |
| [66] | mouse | 8 h / 0          | MI vs MI+neg. con                                          | TTC   | → | n.s.    | 0.19 |
| [67] | mouse | 30 min / 24 h    | con vs DCCI (1d)                                           | TTC   | ↓ | <0.05   | 0.92 |
| [67] | mouse | 30 min / 7 d     | con vs DCCI (7d)                                           | Histo | ↓ | <0.05   | 0.92 |
| [68] | rat   | perm / 3 d       | MI vs MI+iVPCs (endo)                                      | Histo | ↓ | <0.05   | 0.45 |
| [68] | rat   | perm / 3 d       | MI vs MI+iVPCs+PLGA (endo)                                 | Histo | ↓ | <0.05   | 0.42 |
| [68] | rat   | perm / 3 d       | MI vs MI+iVPCs (epi)                                       | Histo | ↓ | <0.05   | 0.36 |
| [68] | rat   | perm / 3 d       | MI vs MI+iVPCs+PLGA (epi)                                  | Histo | ↓ | <0.05   | 0.32 |

|      |       |                  |                                            |       |   |         |      |
|------|-------|------------------|--------------------------------------------|-------|---|---------|------|
| [69] | mouse | perm / 7 d       | con vs IL10                                | TTC   | → | n.s.    | 0.08 |
| [70] | mouse | 48 h / 28 d      | WT vs iNOS -/-                             | TTC   | → | n.s.    | 0.06 |
| [71] | rat   | 30 min / 120 min | con vs paroxetine                          | TTC   | → | n.s.    | 0.27 |
| [72] | rat   | 30 min / 60 min  | con vs 0.25x                               | TTC   | → | n.s.    | 0.07 |
| [72] | rat   | 30 min / 60 min  | con vs 0.5x                                | TTC   | → | n.s.    | 0.74 |
| [72] | rat   | 30 min / 60 min  | con vs 0.75x                               | TTC   | ↓ | <0.001  | 1.00 |
| [72] | rat   | 30 min / 60 min  | con vs 1x                                  | TTC   | ↓ | <0.001  | 1.00 |
| [72] | rat   | 30 min / 60 min  | con vs 2x                                  | TTC   | ↓ | <0.001  | 1.00 |
| [72] | rat   | 30 min / 60 min  | con vs IPC                                 | TTC   | ↓ | <0.001  | 1.00 |
| [72] | rat   | 30 min / 60 min  | con vs <3 kDa                              | TTC   | ↓ | <0.001  | 1.00 |
| [72] | rat   | 30 min / 60 min  | con vs 3-5 kDa                             | TTC   | → | n.s.    | 0.67 |
| [72] | rat   | 30 min / 60 min  | con vs 5-10 kDa                            | TTC   | ↓ | <0.001  | 1.00 |
| [72] | rat   | 30 min / 60 min  | con vs <10 kDa                             | TTC   | ↓ | <0.001  | 1.00 |
| [72] | rat   | 30 min / 60 min  | con vs 10-30 kDa                           | TTC   | → | n.s.    | 0.75 |
| [72] | rat   | 30 min / 60 min  | con vs 30-50 kDa                           | TTC   | → | n.s.    | 0.23 |
| [72] | rat   | 30 min / 60 min  | con vs >50 kDa                             | TTC   | → | n.s.    | 0.12 |
| [72] | rat   | 30 min / 60 min  | 5-10 vs 5-10+chelerytrine                  | TTC   | ↑ | <0.001  | 1.00 |
| [72] | rat   | 30 min / 60 min  | 5-10 vs 5-10+glibenclamide                 | TTC   | ↑ | <0.001  | 1.00 |
| [72] | rat   | 30 min / 60 min  | 5-10 vs 5-10+5-HD                          | TTC   | ↑ | <0.001  | 1.00 |
| [72] | rat   | 30 min / 60 min  | con vs 5-10 kDa                            | TTC   | ↓ | <0.001  | 1.00 |
| [72] | rat   | 30 min / 60 min  | con vs 5-10 Hphob                          | TTC   | ↓ | <0.001  | 1.00 |
| [72] | rat   | 30 min / 60 min  | con vs 5-10 Hphil                          | TTC   | ↓ | <0.05   | 0.36 |
| [72] | rat   | 30 min / 60 min  | con vs 5-10 kDa                            | TTC   | ↓ | <0.001  | 1.00 |
| [72] | rat   | 30 min / 60 min  | con vs HSP10                               | TTC   | ↓ | <0.001  | 1.00 |
| [72] | rat   | 30 min / 60 min  | con vs 5-10+PU-H71                         | TTC   | ↓ | <0.05   | 0.97 |
| [72] | rat   | 30 min / 60 min  | HSP10 vs HSP10+PU-H-71                     | TTC   | ↑ | <0.001  | 0.97 |
| [72] | rat   | 30 min / 60 min  | 5-10 vs 5-10+PU-H71                        | TTC   | ↑ | <0.01   | 1.00 |
| [73] | rat   | 35 min / 60 min  | con vs hexamethonium                       | TTC   | → | n.s.    | 0.25 |
| [73] | rat   | 35 min / 60 min  | con vs IPC                                 | TTC   | ↓ | <0.05   | 1.00 |
| [73] | rat   | 35 min / 60 min  | con vs IPC+hex                             | TTC   | ↓ | <0.05   | 0.43 |
| [73] | rat   | 35 min / 60 min  | IPC vs IPC+hex                             | TTC   | ↑ | <0.05   | 0.91 |
| [73] | rat   | 35 min / 60 min  | con vs IPC                                 | TTC   | ↓ | <0.05   | 1.00 |
| [73] | rat   | 35 min / 60 min  | con vs IPC+atropine                        | TTC   | → | n.s.    | 0.79 |
| [73] | rat   | 35 min / 60 min  | IPC vs IPC+atropine                        | TTC   | ↑ | <0.05   | 1.00 |
| [73] | rat   | 35 min / 60 min  | con vs IPC (effluent)                      | TTC   | ↓ | <0.05   | 0.82 |
| [73] | rat   | 35 min / 60 min  | IPC (eff) vs IPC (eff)+hex                 | TTC   | ↑ | <0.05   | 0.94 |
| [74] | pig   | 40 min / 240 min | pla vs coversin                            | TTC   | ↓ | 0.03    | 0.83 |
| [75] | mouse | perm / 2 wk      | WT vs Sema3A KO                            | Histo | → | n.s.    | 0.12 |
| [76] | mouse | 40 min / 120 min | con vs 1x IPC                              | TTC   | → | n.s.    | 0.17 |
| [76] | mouse | 40 min / 120 min | con vs 4x IPC                              | TTC   | ↓ | <0.01   | 0.99 |
| [76] | mouse | 40 min / 120 min | con vs IPC (PI3kK inh. dur. prot.)         | TTC   | ↓ | <0.001  | 1.00 |
| [76] | mouse | 40 min / 120 min | con vs IPC +G326 (PI3kK inh. dur. prot.)   | TTC   | ↓ | <0.001  | 1.00 |
| [76] | mouse | 40 min / 120 min | con vs IPC +BYL719 (PI3kK inh. dur. prot.) | TTC   | ↓ | <0.001  | 0.99 |
| [76] | mouse | 40 min / 120 min | con vs IPC (PI3kK inh. dur. rep.)          | TTC   | ↓ | <0.001  | 1.00 |
| [76] | mouse | 40 min / 120 min | con vs IPC +G326 (PI3kK inh. dur. rep.)    | TTC   | → | n.s.    | 0.14 |
| [76] | mouse | 40 min / 120 min | con vs IPC +BYL719 (PI3kK inh. dur. rep.)  | TTC   | → | n.s.    | 0.12 |
| [76] | mouse | 40 min / 120 min | con vs IPC (PI3kK inh. dur. rep.)          | TTC   | ↓ | <0.001  | 0.95 |
| [76] | mouse | 40 min / 120 min | con vs IPC +G326 (PI3kK inh. dur. rep.)    | TTC   | → | n.s.    | 0.11 |
| [76] | mouse | 40 min / 120 min | con vs bradykinin                          | TTC   | ↓ | <0.001  | 1.00 |
| [76] | mouse | 40 min / 120 min | con vs insulin                             | TTC   | ↓ | <0.001  | 1.00 |
| [76] | mouse | 40 min / 120 min | con vs insulin+G326                        | TTC   | → | n.s.    | 0.35 |
| [77] | rat   | 20 min / 120 min | sham vs nephrectomy                        | TTC   | ↑ | <0.05   | 0.86 |
| [78] | pig   | 120 min / 3 d    | con vs intermittent pacing                 | MRI   | → | n.s.    | 0.05 |
| [78] | pig   | 120 min / 37 d   | con vs intermittent pacing                 | MRI   | → | n.s.    | 0.40 |
| [79] | mouse | 45 min / 24 h    | WT vs Suv39h1 -/-                          | TTC   | ↓ | <0.01   | 0.95 |
| [79] | mouse | 45 min / 24 h    | WT vs Suv39h2 -/-                          | TTC   | → | n.s.    | 0.24 |
| [79] | mouse | 45 min / 24 h    | veh vs chaetocin                           | TTC   | ↓ | <0.001  | 1.00 |
| [80] | rat   | 60 min / 120 min | veh vs ticagrelor                          | TTC   | ↓ | 0.01999 | 0.92 |
| [80] | rat   | 60 min / 120 min | veh vs VX-765                              | TTC   | ↓ | 0.01999 | 1.00 |
| [80] | rat   | 60 min / 120 min | veh vs IPOC                                | TTC   | ↓ | 0.01999 | 0.92 |
| [80] | rat   | 60 min / 120 min | veh vs cangrelor+VX-765                    | TTC   | ↓ | 0.01999 | 1.00 |
| [80] | rat   | 60 min / 120 min | veh vs ticagrelor+VX-765                   | TTC   | ↓ | 0.01999 | 1.00 |
| [80] | rat   | 60 min / 120 min | veh vs ticagrelor+IPOC                     | TTC   | ↓ | 0.01999 | 0.84 |
| [80] | rat   | 60 min / 120 min | ticagrelor vs cangrelor+VX-765             | TTC   | ↓ | <0.001  | 1.00 |
| [80] | rat   | 60 min / 120 min | ticagrelor vs ticagrelor+VX-765            | TTC   | ↓ | <0.001  | 1.00 |
| [80] | rat   | 60 min / 120 min | ticagrelor vs ticagrelor+IPOC              | TTC   | ↑ | <0.001  | 0.06 |
| [80] | rat   | 60 min / 3 d     | chronic veh vs chronic cangrelor+VX-765    | TTC   | ↓ | <0.001  | 1.00 |
| [80] | rat   | 40 min / 120 min | veh vs VX-765                              | TTC   | ↓ | <0.001  | 1.00 |
| [80] | rat   | 40 min / 90 min  | veh vs VRT-043198                          | TTC   | ↓ | <0.001  | 1.00 |
| [81] | pig   | 60 min / 180 min | con vs IPC                                 | TTC   | ↓ | <0.05   | 1.00 |
| [81] | pig   | 60 min / 180 min | con vs PoCo                                | TTC   | ↓ | <0.05   | 1.00 |
| [81] | pig   | 60 min / 180 min | con vs RIPC                                | TTC   | ↓ | <0.05   | 1.00 |
| [82] | mouse | 60 min / 120 min | con vs IPC                                 | TTC   | ↓ | <0.001  | 1.00 |
| [82] | mouse | 60 min / 120 min | con vs VASP-/-                             | TTC   | ↓ | <0.001  | 1.00 |
| [82] | mouse | 60 min / 120 min | con vs IPC+VASP -/-                        | TTC   | ↓ | <0.001  | 1.00 |
| [82] | mouse | 60 min / 120 min | VASP -/- vs IPC                            | TTC   | ↓ | <0.001  | 1.00 |
| [82] | mouse | 60 min / 120 min | IPC vs IPC+VASP -/-                        | TTC   | ↑ | <0.001  | 1.00 |
| [82] | mouse | 60 min / 120 min | IPC vs IPC+VASP KO                         | TTC   | → | n.s.    | 0.50 |
| [83] | pig   | 60 min / 120 min | con vs LC-VNS                              | TTC   | ↓ | <0.05   | 1.00 |
| [83] | pig   | 60 min / 120 min | con vs LC-VNS+LtVNX                        | TTC   | ↓ | <0.05   | 1.00 |
| [83] | pig   | 60 min / 120 min | con vs LC-VNS+RtVNX                        | TTC   | ↓ | <0.05   | 1.00 |
| [83] | pig   | 60 min / 120 min | con vs LC-VNS+atropine                     | TTC   | → | n.s.    | 0.27 |
| [83] | pig   | 60 min / 120 min | LC-VNS+LC-VNS vs LC-VNS+RtVNX              | TTC   | ↑ | <0.05   | 1.00 |
| [83] | pig   | 60 min / 120 min | LC-VNS+LtVNX vs LC-VNS+RtVNX               | TTC   | ↑ | <0.05   | 1.00 |
| [83] | pig   | 60 min / 120 min | LC-VNS vs atropine                         | TTC   | ↑ | <0.05   | 1.00 |
| [83] | pig   | 60 min / 120 min | LtVNX vs atropine                          | TTC   | ↑ | <0.05   | 1.00 |
| [83] | pig   | 60 min / 120 min | RtVNX vs atropine                          | TTC   | ↑ | <0.05   | 1.00 |
| [84] | rat   | 45 min / 120 min | lean con vs lean RIPC                      | TTC   | ↓ | <0.01   | 1.00 |

|       |        |                  |                                                 |       |   |         |        |
|-------|--------|------------------|-------------------------------------------------|-------|---|---------|--------|
| [84]  | rat    | 45 min / 120 min | lean con vs fatty con                           | TTC   | → | n.s.    | 0.06   |
| [84]  | rat    | 45 min / 120 min | lean con vs fatty RIPC                          | TTC   | → | n.s.    | 0.11   |
| [85]  | mouse  | 40 min / 120 min | con vs GNTN patch (before isch)                 | TTC   | ↓ | <0.001  | 1.00   |
| [85]  | mouse  | 40 min / 120 min | con vs RIPC                                     | TTC   | ↓ | <0.001  | 0.98   |
| [85]  | mouse  | 40 min / 120 min | con vs GNTN patch (before rep)                  | TTC   | ↓ | <0.01   | 1.00   |
| [86]  | mouse  | 30 min / 24 h    | WT vs Spry1 cKO                                 | TTC   | ↓ | <0.05   | 0.83   |
| [86]  | mouse  | 30 min / 24 h    | Spry fl/fl vs Spry1 cKO                         | TTC   | ↓ | <0.01   | 0.99   |
| [87]  | pig    | 60 min / 180 min | pla vs IPC                                      | TTC   | ↓ | <0.05   | 1.00   |
| [87]  | pig    | 60 min / 180 min | pla vs RIPC                                     | TTC   | ↓ | <0.05   | 1.00   |
| [87]  | pig    | 60 min / 180 min | pla vs RPER                                     | TTC   | ↓ | <0.05   | 1.00   |
| [87]  | pig    | 60 min / 180 min | pla vs PoCo                                     | TTC   | ↓ | <0.05   | 1.00   |
| [88]  | pig    | 60 min / 120 min | con vs canagliflozin                            | TTC   | ↓ | <0.05   | 0.81   |
| [89]  | rat    | 30 min / 24 h    | con vs RIPC                                     | TTC   | ↓ | <0.05   | 0.94   |
| [89]  | rat    | 30 min / 24 h    | con vs ED5 SCR-RIPC                             | TTC   | ↓ | <0.05   | 1.00   |
| [89]  | rat    | 30 min / 24 h    | RIPC vs ED5-RIPC                                | TTC   | ↑ | <0.0001 | 1.00   |
| [89]  | rat    | 30 min / 24 h    | ED5-RIPC vs ED5 SCR-RIPC                        | TTC   | ↓ | <0.0001 | 1.00   |
| [90]  | mouse  | 30 min / 24 h    | WT-contol vs WT-linagliptin                     | TTC   | ↓ | <0.001  | 1.00   |
| [90]  | mouse  | 30 min / 24 h    | WT-contol vs WT-exendin-4                       | TTC   | ↓ | <0.001  | 0.99   |
| [90]  | mouse  | 30 min / 24 h    | db/db-contol vs db/db-linagliptin               | TTC   | ↓ | <0.001  | 1.00   |
| [90]  | mouse  | 30 min / 24 h    | db/db-contol vs db/db-exendin                   | TTC   | ↓ | <0.001  | 1.00   |
| [91]  | mouse  | 30 min / 24 h    | (L5) WT/WT vs OE/OE+DOX                         | TTC   | → | n.s.    | 0.15   |
| [91]  | mouse  | 30 min / 24 h    | (L5) WT/WT vs WT/WT+NS398                       | TTC   | → | n.s.    | 0.22   |
| [91]  | mouse  | 30 min / 24 h    | (L5) WT/WT vs WT/OE                             | TTC   | → | n.s.    | 0.16   |
| [91]  | mouse  | 30 min / 24 h    | (L5) WT/WT vs OE/OE                             | TTC   | ↓ | <0.05   | 0.88   |
| [91]  | mouse  | 30 min / 24 h    | (L5) WT/WT vs OE/OE+NS398                       | TTC   | → | n.s.    | 0.06   |
| [91]  | mouse  | 30 min / 24 h    | (L7) WT/WT vs WT/OE                             | TTC   | → | n.s.    | 0.15   |
| [91]  | mouse  | 30 min / 24 h    | (L7) WT/WT vs OE/OE                             | TTC   | ↓ | <0.05   | 1.00   |
| [91]  | mouse  | 30 min / 24 h    | (L8) WT/WT vs WT/OE                             | TTC   | → | n.s.    | 0.13   |
| [91]  | mouse  | 30 min / 24 h    | (L8) WT/WT vs OE/OE                             | TTC   | ↓ | <0.05   | 1.00   |
| [92]  | rabbit | 30 min / 180 min | con vs discrete hypothermia                     | TTC   | ↓ | <0.05   | 1.00   |
| [92]  | rabbit | 30 min / 180 min | con vs continuous hypothermia                   | TTC   | ↓ | <0.05   | 1.00   |
| [92]  | rabbit | 30 min / 180 min | discrete hypothermia vs continuous hypothermia  | TTC   | ↓ | <0.05   | 1.00   |
| [92]  | rabbit | 30 min / 180 min | con vs malonate                                 | TTC   | ↓ | <0.05   | 0.98   |
| [92]  | rabbit | 30 min / 180 min | malonate vs malonate+discrete hypothermia       | TTC   | ↓ | <0.05   | 1.00   |
| [92]  | mouse  | 30 min / 120 min | normotherm vs hypotherm                         | TTC   | ↓ | <0.05   | 1.00   |
| [93]  | rat    | 30 min / 180 min | veh vs GDF11                                    | TTC   | ↓ | <0.05   | 1.00   |
| [93]  | rat    | 30 min / 180 min | GDF11 vs FST+GDF11                              | TTC   | ↑ | <0.05   | 0.99   |
| [93]  | rat    | 30 min / 180 min | GDF11 vs FST                                    | TTC   | ↑ | <0.05   | 1.00   |
| [94]  | rat    | 40 min / 28 d    | 28d vs 28d+INFa                                 | Histo | → | 0.002   | 0.91   |
| [94]  | rat    | 40 min / 4 d     | 4d vs 4d+INFa                                   | Histo | → | n.s.    | 0.28   |
| [95]  | mouse  | 25 min / 40 min  | con vs E2 (male)                                | TTC   | ↓ | <0.05   | 0.77   |
| [95]  | mouse  | 25 min / 40 min  | con vs E2 (OVX-female)                          | TTC   | ↓ | <0.05   | 0.88   |
| [95]  | mouse  | 25 min / 40 min  | male vs fem                                     | TTC   | ↓ | <0.05   | 0.85   |
| [96]  | rat    | 30 min / 120 min | con vs H2O2-Poc                                 | TTC   | ↓ | <0.001  | 1.00   |
| [96]  | rat    | 30 min / 120 min | con vs Ctrl+AG490                               | TTC   | → | n.s.    | 0.07   |
| [96]  | rat    | 30 min / 120 min | con H2O2-Poc+AG490                              | TTC   | → | n.s.    | 0.07   |
| [96]  | rat    | 30 min / 120 min | H2O2-POC vs H2O2-POC+AG490                      | TTC   | ↑ | <0.001  | 1.00   |
| [97]  | rat    | 40 min / 120 min | con vs RIC                                      | TTC   | ↓ | <0.05   | 0.99   |
| [97]  | rat    | 40 min / 120 min | RIC vs 1MT                                      | TTC   | ↑ | <0.05   | 0.97   |
| [97]  | rat    | 40 min / 120 min | RIC vs RIC+1MT                                  | TTC   | ↑ | <0.05   | 0.87   |
| [98]  | pig    | 90 min / 24 h    | con vs DFP                                      | MRI   | → | n.s.    | 0.11   |
| [98]  | pig    | 90 min / 1 wk    | con vs DFP                                      | MRI   | → | n.s.    | 0.25   |
| [98]  | pig    | 90 min / 28 d    | con vs DFP                                      | MRI   | → | n.s.    | 0.07   |
| [99]  | rat    | 30 min / 120 min | Veh vs RIC                                      | TTC   | ↓ | <0.001  | 0.99   |
| [99]  | rat    | 30 min / 120 min | Veh vs emricasan                                | TTC   | ↓ | <0.001  | 0.98   |
| [99]  | rat    | 30 min / 120 min | Veh vs background drugs                         | TTC   | ↓ | <0.001  | 0.95   |
| [99]  | rat    | 30 min / 120 min | Veh vs background drugs+RIC                     | TTC   | ↓ | <0.01   | 0.97   |
| [99]  | rat    | 30 min / 120 min | Veh vs background drugs+emricasan               | TTC   | ↓ | <0.001  | 1.00   |
| [99]  | rat    | 30 min / 120 min | background drugs vs background drugs+emricasan  | TTC   | ↓ | <0.01   | 0.86   |
| [99]  | rat    | 30 min / 120 min | Veh vs background drugs                         | TTC   | ↓ | <0.001  | 1.00   |
| [99]  | rat    | 30 min / 120 min | Veh vs background drugs+wortmannin              | TTC   | → | n.s.    | 0.31   |
| [99]  | rat    | 30 min / 120 min | Veh vs emricasan                                | TTC   | ↓ | <0.01   | 0.99   |
| [99]  | rat    | 30 min / 120 min | Veh vs emricasan+wortmannin                     | TTC   | ↓ | <0.01   | 0.99   |
| [99]  | rat    | 30 min / 120 min | background drugs vs background drugs+wortmannin | TTC   | ↑ | <0.01   | 0.96   |
| [100] | mouse  | 60 min / min     | con vs NEU1 OE                                  | Histo | → | n.s.    | 0.09   |
| [101] | mouse  | perm / 1 wk      | con vs M0-Exo                                   | TTC   | → | n.s.    | 0.11   |
| [102] | pig    | 30 min / 1 wk    | con vs metoprolol                               | MRI   | ↓ | <0.05   | 0.79 ② |
| [102] | pig    | 35 min / 1 wk    | con vs metoprolol                               | MRI   | ↓ | <0.05   | 0.93 ② |
| [102] | pig    | 40 min / 1 wk    | con vs metoprolol                               | MRI   | ↓ | <0.01   | 0.98 ② |
| [102] | pig    | 45 min / 1 wk    | con vs metoprolol                               | MRI   | ↓ | <0.01   | 0.90 ② |
| [102] | pig    | 50 min / 1 wk    | con vs metoprolol                               | MRI   | ↓ | <0.01   | 0.99 ② |
| [103] | mouse  | 45 min / 0 min   | con vs iv-atorvastatin                          | TTC   | ↓ | <0.05   | 1.00   |
| [103] | mouse  | 45 min / 0 min   | con vs AMPK inhibition                          | TTC   | ↑ | <0.05   | 0.79   |
| [103] | mouse  | 45 min / 0 min   | con vs IV-β-OH-simvastatin                      | TTC   | ↓ | <0.05   | 1.00   |
| [103] | rat    | perm / 30 d      | con vs iv-atorvastatin                          | Histo | ↓ | <0.05   | 0.94   |
| [104] | rat    | 30 min / 120 min | con vs RIPC                                     | TTC   | ↓ | <0.05   | 0.90   |
| [104] | rat    | 30 min / 120 min | con vs UAG                                      | TTC   | ↓ | <0.05   | 0.93   |
| [104] | rat    | 30 min / 120 min | con vs RIPC +AG490                              | TTC   | → | n.s.    | 0.13   |
| [104] | rat    | 30 min / 120 min | con vs UAG-AG490                                | TTC   | → | n.s.    | 0.06   |
| [104] | rat    | 30 min / 120 min | RIPC vs RIPC +AG490                             | TTC   | ↑ | <0.05   | 1.00   |
| [104] | rat    | 30 min / 120 min | UAG vs RIPC +AG490                              | TTC   | ↑ | <0.05   | 1.00   |
| [104] | rat    | 30 min / 120 min | RIPC +AG490 vs UAG+AG490                        | TTC   | → | n.s.    | 0.13   |
| [104] | rat    | 30 min / 120 min | RIPC vs UAG+AG490                               | TTC   | ↑ | <0.05   | 0.97   |
| [104] | rat    | 30 min / 120 min | UAG vs UAG+AG490                                | TTC   | ↑ | <0.05   | 0.98   |
| [105] | mouse  | 45 min / 3 d     | renal innervated vs denervated                  | TTC   | ↓ | <0.001  | 0.63   |
| [106] | rat    | 30 min / 120 min | veh vs bradykinin                               | TTC   | ↓ | <0.05   | 0.81   |
| [106] | rat    | 30 min / 120 min | veh vs small extracellular vesicles             | TTC   | ↓ | <0.05   | 0.84   |
| [107] | mouse  | perm / 1 wk      | WT vs sFRP2 OE                                  | Histo | ↓ | <0.05   | 0.99   |

|       |       |                  |                                                    |       |   |         |      |
|-------|-------|------------------|----------------------------------------------------|-------|---|---------|------|
| [107] | mouse | perm / 1 wk      | sFRP2-WT vs sFRP2 OE+ABSEF                         | Histo | → | n.s.    | 0.33 |
| [107] | mouse | perm / 1 wk      | sFRP2 OE vs sFRP2 OE+ABSEF                         | Histo | ↑ | <0.05   | 0.94 |
| [108] | pig   | 90 min / 2 d     | con vs MSC                                         | MRI   | → | n.s.    | 0.80 |
| [108] | pig   | 90 min / 7 d     | con vs MSC                                         | MRI   | ↓ | <0.05   | 1.00 |
| [109] | mouse | 45 min / 0-24h   | PKcs- <i>fff</i> vs PKcs- <i>cKO</i>               | TTC   | ↓ | <0.05   | 1.00 |
| [109] | mouse | 45 min / 0-24h   | BL-1/DNA-PKcs- <i>fff</i> vs DNA-PKcs- <i>cKO</i>  | TTC   | ↓ | <0.05   | 1.00 |
| [109] | mouse | 45 min / 0-24h   | DNA-PKcs- <i>cKO</i> vs DANN-PKcs/BL-1- <i>cKO</i> | TTC   | ↑ | <0.05   | 1.00 |
| [109] | mouse | 45 min / 0-24h   | WT vs BL-1 OE                                      | TTC   | ↓ | <0.05   | 1.00 |
| [110] | mouse | 45 min / 1 wk    | scramble pept. vs TAG-23                           | TTC   | ↓ | <0.0001 | 1.00 |
| [110] | mouse | 45 min / 1 wk    | scramble pept. vs TAG-23                           | Histo | ↓ | <0.05   | 1.00 |
| [111] | pig   | 60 min / 120 min | con vs DMX-10001                                   | TTC   | → | n.s.    | 0.55 |
| [111] | pig   | 60 min / 120 min | con vs DMX-10001 (w.o. outlier)                    | TTC   | → | n.s.    | 0.62 |
| [112] | mouse | 45 min / 120 min | con vs IPC                                         | TTC   | ↓ | <0.05   | 0.72 |
| [112] | mouse | 45 min / 120 min | CX43-MAPKmut vs CX43-MAPKmut+IPC                   | TTC   | ↓ | <0.05   | 1.00 |
| [112] | mouse | 45 min / 120 min | CX43-PKcmut vs CX43-PKcmut+IPC                     | TTC   | ↓ | <0.05   | 1.00 |
| [112] | mouse | 45 min / 120 min | CX43-CK1mut-con vs CX43-CK1mut-IPC                 | TTC   | → | n.s.    | 0.06 |
| [113] | mouse | 30 min / 24 h    | pla vs GUE1654-0.3 mg/kg                           | TTC   | ↓ | <0.05   | 0.70 |
| [113] | mouse | 30 min / 24 h    | pla vs GUE1654-1 mg/kg                             | TTC   | ↓ | <0.01   | 0.90 |
| [113] | mouse | 30 min / 24 h    | pla vs GUE1654-3 mg/kg                             | TTC   | ↓ | <0.01   | 0.98 |
| [113] | mouse | 30 min / 24 h    | pla vs metoprolol                                  | TTC   | ↓ | <0.01   | 1.00 |
| [113] | mouse | 30 min / 24 h    | con vs BCAT1 OE                                    | TTC   | ↓ | <0.01   | 0.96 |
| [113] | mouse | 30 min / 24 h    | con vs BCAT2 OE                                    | TTC   | ↓ | <0.01   | 1.00 |
| [114] | mouse | 45 min / 6 h     | AAV9-NC vs AAV9-HINT2                              | TTC   | ↓ | <0.05   | 0.97 |
| [114] | mouse | 45 min / 6 h     | AAV9-NC vs AAV9-NC+Ru360                           | TTC   | ↓ | <0.05   | 1.00 |
| [114] | mouse | 45 min / 6 h     | AAV9-HINT2 vs AAV9-HINT2+spermine                  | TTC   | ↓ | <0.05   | 0.75 |
| [115] | rat   | 30 min / 120 min | con vs PoCo                                        | TTC   | ↓ | <0.001  | 1.00 |
| [115] | rat   | 30 min / 120 min | con vs T3-100 µg                                   | TTC   | ↓ | <0.001  | 1.00 |
| [115] | rat   | 30 min / 120 min | con vs T3-200 µg                                   | TTC   | ↓ | <0.001  | 1.00 |
| [115] | rat   | 30 min / 120 min | con vs T3-300 µg                                   | TTC   | ↓ | <0.001  | 1.00 |
| [115] | rat   | 30 min / 120 min | con vs T3-500 µg                                   | TTC   | ↓ | <0.001  | 1.00 |
| [115] | rat   | 30 min / 120 min | PoCo vs T3-100 µg                                  | TTC   | ↑ | <0.01   | 1.00 |
| [115] | rat   | 30 min / 120 min | T3-300 µg vs T3-100 µg                             | TTC   | ↑ | <0.01   | 1.00 |
| [115] | rat   | 30 min / 120 min | T3-500 µg vs T3-100 µg                             | TTC   | ↑ | <0.01   | 0.98 |
| [115] | rat   | 30 min / 120 min | T3-200 µg vs T3-100 µg                             | TTC   | → | n.s.    | 0.05 |
| [115] | rat   | 30 min / 120 min | RISK-BL vs T3-300 µg                               | TTC   | ↓ | <0.001  | 1.00 |
| [115] | rat   | 30 min / 120 min | SAFE-BL vs T3-300 µg                               | TTC   | ↓ | <0.001  | 1.00 |
| [115] | rat   | 30 min / 120 min | T3-300 µg+PI3K-BL vs T3-300 µg                     | TTC   | ↓ | <0.001  | 1.00 |
| [115] | rat   | 30 min / 120 min | T3-300 µg+ERK-BL vs T3-300 µg                      | TTC   | ↓ | <0.001  | 0.98 |
| [115] | rat   | 30 min / 120 min | T3-300 µg+RISK-BL vs T3-300 µg                     | TTC   | ↓ | <0.001  | 1.00 |
| [115] | rat   | 30 min / 120 min | T3-300 µg+SAFE-BL vs T3-300 µg                     | TTC   | → | n.s.    | 0.18 |
| [115] | rat   | 30 min / 120 min | con vs T3-300 µg+SAFE-BL                           | TTC   | ↓ | <0.01   | 1.00 |
| [115] | rat   | 30 min / 120 min | RISK-BL vs T3-300 µg+SAFE-BL                       | TTC   | ↓ | <0.01   | 1.00 |
| [115] | rat   | 30 min / 120 min | SAFE-BL vs T3-300 µg+SAFE-BL                       | TTC   | ↓ | <0.01   | 1.00 |
| [115] | rat   | 30 min / 120 min | T3-300 µg-PI3K-BL vs T3-300 µg+SAFE-BL             | TTC   | ↓ | <0.01   | 0.99 |
| [115] | rat   | 30 min / 120 min | T3-300 µg-ERK-BL vs T3-300 µg+SAFE-BL              | TTC   | ↓ | <0.01   | 0.88 |
| [115] | rat   | 30 min / 120 min | T3-300 µg-RISK-BL vs T3-300 µg+SAFE-BL             | TTC   | ↓ | <0.01   | 1.00 |
| [116] | mouse | perm / 8 wk      | con vs LncHrt                                      | Histo | ↓ | <0.05   | 0.73 |
| [117] | mouse | 45 min / 120 min | empty vector vs overexpression vector              | TTC   | ↑ | <0.001  | 0.95 |
| [117] | mouse | 45 min / 120 min | con vs ZIP7 cKO                                    | TTC   | ↓ | <0.001  | 1.00 |
| [117] | mouse | 45 min / 120 min | con vs siZIP7                                      | TTC   | ↓ | <0.001  | 1.00 |
| [117] | mouse | 45 min / 120 min | ZIP7 cKO vs ZIP7 cKO+siPINK1                       | TTC   | ↑ | <0.001  | 1.00 |
| [117] | mouse | 45 min / 120 min | ZIP7 cKO vs siPINK1                                | TTC   | ↑ | <0.001  | 1.00 |
| [117] | mouse | 45 min / 120 min | siZIP7 vs ZIP7 cKO+siPINK1                         | TTC   | ↑ | <0.001  | 1.00 |
| [117] | mouse | 45 min / 120 min | siZIP7 vs siPINK1                                  | TTC   | ↑ | <0.001  | 1.00 |
| [118] | mouse | perm / 28 d      | WT vs NPPA-AS KO                                   | Histo | ↓ | <0.05   | 1.00 |
| [119] | mouse | 60 min / 6 wk    | PBS vs clondronate                                 | SPECT | ↑ | 0.0496  | 0.68 |
| [120] | rat   | 25 min / 60 min  | h RBC vs STEMI RBC                                 | TTC   | ↓ | <0.001  | 1.00 |
| [120] | rat   | 25 min / 60 min  | STEMI RBC vs STEMI RBC+LNAME                       | TTC   | ↑ | <0.01   | 1.00 |
| [120] | rat   | 25 min / 60 min  | STEMI RBC vs STEMI RBC+ODQ                         | TTC   | ↑ | <0.01   | 0.97 |
| [120] | rat   | 25 min / 60 min  | STEMI RBC vs KT5823+STEMI RBC                      | TTC   | ↑ | <0.001  | 1.00 |
| [120] | rat   | 25 min / 60 min  | STEMI RBC vs STEMI RBC+MRS2211                     | TTC   | ↑ | <0.01   | 1.00 |
| [120] | rat   | 25 min / 60 min  | h RBC vs h RBC+mATP                                | TTC   | ↓ | <0.001  | 1.00 |
| [120] | rat   | 25 min / 60 min  | h RBC+mATP vs h RBC+mATP+ODQ                       | TTC   | ↑ | <0.05   | 0.78 |
| [120] | rat   | 25 min / 60 min  | h RBC+mATP vs h RBC+mATP+MRS211                    | TTC   | ↑ | <0.001  | 1.00 |
| [121] | pig   | 60 min / 180 min | con vs IPC                                         | TTC   | → | n.s.    | 0.28 |
| [122] | mouse | 30 min / 120 min | con vs EMPA                                        | TTC   | ↓ | <0.01   | 0.99 |
| [122] | mouse | 30 min / 120 min | con vs DAPA                                        | TTC   | ↓ | <0.001  | 0.99 |
| [122] | mouse | 30 min / 120 min | con vs ERTU                                        | TTC   | → | n.s.    | 0.56 |
| [122] | mouse | 30 min / 120 min | con (2) vs static                                  | TTC   | → | n.s.    | 0.23 |
| [122] | mouse | 30 min / 120 min | con (2) vs EMPA                                    | TTC   | ↓ | <0.001  | 0.99 |
| [122] | mouse | 30 min / 120 min | EMPA vs EMPA+static                                | TTC   | ↑ | <0.05   | 0.78 |
| [122] | mouse | 30 min / 120 min | con (2) vs DAPA                                    | TTC   | ↓ | <0.001  | 0.98 |
| [122] | mouse | 30 min / 120 min | static vs DAPA                                     | TTC   | ↓ | <0.01   | 0.92 |
| [122] | mouse | 30 min / 120 min | DAPA vs DAPA+static                                | TTC   | ↑ | <0.05   | 0.74 |
| [122] | mouse | 30 min / 120 min | wortmannin vs EMPA                                 | TTC   | ↓ | <0.01   | 0.96 |
| [122] | mouse | 30 min / 120 min | EMPA vs EMPA+wortmannin                            | TTC   | → | n.s.    | 0.46 |
| [122] | mouse | 30 min / 120 min | wortmannin vs DAPA                                 | TTC   | ↓ | <0.001  | 0.95 |
| [122] | mouse | 30 min / 120 min | DAPA vs DAPA+wortmannin                            | TTC   | ↑ | <0.05   | 0.77 |
| [123] | mouse | 35 min / 24 h    | con vs p-selectin deficiency                       | TTC   | → | n.s.    | 0.11 |
| [124] | rat   | 30 min / 120 min | con vs FC                                          | TTC   | ↓ | <0.0001 | 0.96 |
| [124] | rat   | 30 min / 120 min | con vs HM3Dq                                       | TTC   | ↑ | <0.0001 | 1.00 |
| [124] | rat   | 30 min / 120 min | con vs HM4Di                                       | TTC   | ↓ | <0.0001 | 1.00 |
| [124] | rat   | 30 min / 120 min | con vs CPZ                                         | TTC   | ↓ | <0.0001 | 1.00 |
| [124] | rat   | 30 min / 120 min | con vs L70306                                      | TTC   | ↓ | <0.0001 | 0.91 |
| [124] | rat   | 30 min / 120 min | con vs CGPR8-37                                    | TTC   | ↓ | <0.0001 | 0.91 |
| [125] | mouse | 30 min / 24 h    | veh vs 0.15 mg ML-SI3                              | TTC   | ↓ | <0.001  | 1.00 |
| [125] | mouse | 30 min / 24 h    | veh vs 1.5 mg ML-SI3                               | TTC   | ↓ | <0.001  | 1.00 |
| [125] | mouse | 30 min / 24 h    | 0.15 mg vs 1.5 mg ML-SI3                           | TTC   | ↓ | <0.001  | 1.00 |

| [125]                          | mouse   | 30 min / 24 h    | con vs ML-SI3                                                   | Histo  | ↓      | <0.05   | 1.00  |      |
|--------------------------------|---------|------------------|-----------------------------------------------------------------|--------|--------|---------|-------|------|
| [125]                          | mouse   | 30 min / 24 h    | 1D AAV-cTNT-vector vs 1D OE-AAV-cTNT-TRPML1                     | TTC    | ↑      | <0.05   | 0.90  |      |
| [125]                          | mouse   | 30 min / 24 h    | IR-1D AAV-cTNT-vector vs 1D OE-AAV-cTNT-TRPML1V432P             | TTC    | ↑      | <0.001  | 0.94  |      |
| [125]                          | mouse   | 30 min / 24 h    | IR-1D AAV-cTNT-vector vs NAC-1D OE-AAV-cTNT-vector              | TTC    | ↓      | <0.001  | 1.00  |      |
| [125]                          | mouse   | 30 min / 24 h    | IR-1D OE-AAV-cTNT-TRPML1 vs NAC-1D OE-AAV-cTNT-TRPML1           | TTC    | ↓      | <0.001  | 1.00  |      |
| [125]                          | mouse   | 30 min / 24 h    | IR-1D OE-AAV-cTNT-TRPML1V432P vs NAC-1D OE-AAV-cTNT-TRPML1V432P | TTC    | →      | n.s.    | 0.23  |      |
| [126]                          | mouse   | perm / 24 h      | veh vs EMPA 10 mg                                               | Histo  | ↓      | <0.05   | 0.87  |      |
| [126]                          | mouse   | perm / 24 h      | veh vs EMPA 30 mg                                               | Histo  | ↓      | <0.001  | 1.00  |      |
| [126]                          | mouse   | perm / 24 h      | WT vs Nhe1 KO                                                   | TTC    | ↓      | <0.05   | 0.73  |      |
| [126]                          | mouse   | perm / 24 h      | Nhe1 KO vs EMPA                                                 | TTC    | →      | n.s.    | 0.24  |      |
| [127]                          | mouse   | 30 min / 40 min  | veh vs ARP                                                      | TTC    | ↓      | 0.026   | 0.98  |      |
| [127]                          | mouse   | 30 min / 40 min  | veh vs ONO                                                      | TTC    | ↓      | 0.026   | 0.92  |      |
| [128]                          | rat     | 30 min / 28 d    | con vs RIC                                                      | TTC    | ↓      | <0.05   | 1.00  |      |
| [128]                          | rat     | perm / 28 d      | Exo vs Exo+RIC                                                  | TTC    | ↓      | <0.05   | 1.00  |      |
| [129]                          | pig     | 60 min / 180 min | con vs metoprolol                                               | TTC    | →      | n.s.    | 0.28  |      |
| [130]                          | rat     | 40 min / 120 min | pla vs imatinib                                                 | TTC    | ↓      | 0.002   | 0.96  |      |
| [130]                          | rat     | 45 min / 180 min | pla vs imatinib                                                 | TTC    | ↓      | 0.013   | 0.85  |      |
| [130]                          | rat     | 45 min / 180 min | pla vs imatinib                                                 | MRI    | ↓      | 0.008   | 0.90  |      |
| [131]                          | mouse   | 45 min / 24 h    | pla vs rivaroxaban                                              | TTC    | →      | n.s.    | 0.08  | ②    |
| [132]                          | rat     | perm / 7 d       | saline vs CNO                                                   | Histo  | ↓      | <0.05   | 0.80  |      |
| [133]                          | mouse   | perm / 5 wk      | WT vs Smyd1a OE                                                 | Histo  | ↓      | <0.05   | 0.81  |      |
| [134]                          | mouse   | perm / 28 d      | Tet ON vs Tet OFF                                               | Histo  | ↓      | <0.05   | 0.21  |      |
| [135]                          | mouse   | perm / 14 wk     | WT vs GSK3a KO                                                  | Histo  | ↓      | 0.026   | 0.93  |      |
| [136]                          | mouse   | 40 min / 24 h    | veh vs CY-09                                                    | TTC    | ↓      | <0.01   | 0.57  |      |
| [136]                          | mouse   | 40 min / 24 h    | CY-09 vs CY-09 delayed                                          | TTC    | ↑      | <0.05   | 0.33  |      |
| [136]                          | mouse   | 40 min / 24 h    | WT vs NLRP3 -/-                                                 | TTC    | ↓      | <0.001  | 1.00  |      |
| [136]                          | mouse   | 40 min / 24 h    | SPLX vs WT-SPAT                                                 | TTC    | ↑      | <0.05   | 0.69  |      |
| [136]                          | mouse   | 40 min / 24 h    | WT SPAT vs NLRP3-/- SPAT                                        | TTC    | ↓      | <0.01   | 0.72  |      |
| [136]                          | mouse   | 40 min / 24 h    | SPLX vs WT-SPAT+Spl-leuKO                                       | TTC    | ↑      | <0.001  | 0.93  |      |
| [136]                          | mouse   | 40 min / 24 h    | WT SPAT vs NLRP3-/- SPAT +Spl leuKO                             | TTC    | ↑      | <0.01   | 0.89  |      |
| [137]                          | mouse   | perm / 28 d      | WT vs CD34 KO                                                   | Histo  | ↓      | <0.05   | 0.27  |      |
| [138]                          | mouse   | 30 min / 4 h     | veh vs GI-Y1 25 mg/kg (2h pre)                                  | TTC    | ↓      | <0.001  | 0.84  |      |
| [138]                          | mouse   | 30 min / 4 h     | veh vs GI-Y1 50 mg/kg (2h pre)                                  | TTC    | ↓      | <0.001  | 1.00  |      |
| [138]                          | mouse   | 30 min / 4 h     | veh vs GI-Y1 50 mg/kg (1 min rep)                               | TTC    | ↓      | <0.01   | 0.85  |      |
| [138]                          | mouse   | 30 min / 2 wk    | veh vs GI-Y1 50 mg/kg (1 min rep)                               | TTC    | ↓      | <0.001  | 0.94  |      |
| [138]                          | mouse   | 30 min / 4 h     | WT vs Gsdmd KO                                                  | TTC    | ↓      | <0.01   | 1.00  |      |
| [138]                          | mouse   | 30 min / 4 h     | WT vs Gsdmd KO+GI-Y1                                            | TTC    | ↓      | <0.01   | 0.98  |      |
| <b>Cardiovascular Research</b> |         |                  |                                                                 |        |        |         |       |      |
| ref.                           | species | I/R timing       | intervention                                                    | method | effect | p-value | power | note |
| [139]                          | rat     | 25 min / 120 min | sedentary vs exercise (untreated)                               | TTC    | ↓      | <0.05   | 0.91  |      |
| [139]                          | rat     | 25 min / 120 min | exercise vs exercise+BCNU                                       | TTC    | ↑      | <0.05   | 1.00  |      |
| [139]                          | rat     | 25 min / 120 min | sedentary vs exercise                                           | TTC    | ↓      | <0.05   | 1.00  |      |
| [139]                          | rat     | 25 min / 120 min | sedentary vs exercise+bendavia                                  | TTC    | ↓      | <0.05   | 0.86  |      |
| [139]                          | rat     | 25 min / 120 min | sedentary vs exercise+moto TEMPO                                | TTC    | ↓      | <0.05   | 1.00  |      |
| [140]                          | mouse   | 45 min / 24 h    | WT vs TRPM2 KO                                                  | TTC    | ↓      | <0.01   | 1.00  |      |
| [140]                          | mouse   | 60 min / 120 min | heart +/- 0 vs heart +/- PMN+/-                                 | TTC    | ↑      | <0.05   | 1.00  |      |
| [140]                          | mouse   | 60 min / 120 min | heart +/- 0 vs heart +/- PMN-/-                                 | TTC    | ↑      | <0.05   | 0.98  |      |
| [140]                          | mouse   | 60 min / 120 min | heart +/- PMN+/- vs heart +/- PMN-/-                            | TTC    | ↓      | <0.05   | 1.00  |      |
| [140]                          | mouse   | 60 min / 120 min | heart -/- 0 vs heart -/- PMN+/-                                 | TTC    | ↑      | <0.05   | 1.00  |      |
| [140]                          | mouse   | 60 min / 120 min | heart -/- 0 vs heart -/- PMN-/-                                 | TTC    | ↑      | <0.05   | 0.92  |      |
| [140]                          | mouse   | 60 min / 120 min | heart +/- PMN+/- vs heart -/- PMN-/-                            | TTC    | ↓      | <0.05   | 1.00  |      |
| [140]                          | mouse   | 60 min / 120 min | heart +/- PMN-/- vs heart -/- PMN-/-                            | TTC    | ↓      | <0.05   | 0.54  |      |
| [140]                          | mouse   | 45 min / 120 min | mouse +/- PMN 0 vs mouse -/- PMN 0                              | TTC    | ↓      | <0.05   | 0.99  |      |
| [140]                          | mouse   | 45 min / 120 min | mouse -/- PMN 0 vs mouse +/- PMN +/-                            | TTC    | ↑      | <0.05   | 1.00  |      |
| [140]                          | mouse   | 45 min / 120 min | mouse -/- PMN 0 vs mouse +/- PMN-/-                             | TTC    | ↑      | <0.05   | 1.00  |      |
| [140]                          | mouse   | 45 min / 120 min | mouse -/- PMN 0 vs mouse +/- PMN-/-                             | TTC    | ↑      | <0.05   | 0.96  |      |
| [140]                          | mouse   | 45 min / 120 min | mouse -/- PMN +/- vs mouse -/- PMN-/-                           | TTC    | ↓      | <0.05   | 0.78  |      |
| [140]                          | mouse   | 45 min / 120 min | mouse +/- PMN-/- vs mouse -/- PMN-/-                            | TTC    | ↓      | <0.05   | 0.99  |      |
| [140]                          | mouse   | 45 min / 120 min | mouse -/- PMN 0 vs mouse -/- PMN +/-                            | TTC    | ↑      | <0.05   | 0.98  |      |
| [140]                          | mouse   | 45 min / 120 min | mouse -/- PMN +/- vs mouse -/- PMN -/-                          | TTC    | ↑      | <0.05   | 0.05  |      |
| [141]                          | mouse   | 30 min / 24 h    | con vs Nucleolin OE Line52                                      | TTC    | ↓      | <0.05   | 0.37  |      |
| [141]                          | mouse   | 30 min / 24 h    | con vs Nucleolin OE Line86                                      | TTC    | ↓      | <0.05   | 0.81  |      |
| [141]                          | mouse   | 30 min / 24 h    | con vs nucleolin OE                                             | TTC    | ↓      | <0.05   | 0.99  |      |
| [141]                          | mouse   | 30 min / 24 h    | Nucleolin OE vs Nucleolin OE+ZnPP                               | TTC    | ↑      | <0.05   | 0.77  |      |
| [142]                          | mouse   | perm / 24 h      | WT vs human hspa12b gene OE                                     | TTC    | ↓      | <0.01   | 1.00  |      |
| [143]                          | mouse   | perm / 14 d      | saline vs parthenogenetic ESCs                                  | Histo  | →      | n.s.    | 0.80  |      |
| [144]                          | mouse   | perm / 24 h      | WT vs CD13 KO                                                   | TTC    | →      | n.s.    | 0.05  |      |
| [145]                          | mouse   | 35 min / 60 min  | WT vs ASC KO                                                    | TTC    | →      | n.s.    | 0.14  |      |
| [145]                          | mouse   | 35 min / 60 min  | WT vs NLRP3 KO                                                  | TTC    | ↓      | <0.05   | 0.77  |      |
| [146]                          | rat     | perm / 8 wk      | con vs SV-rSkM                                                  | Histo  | →      | n.s.    | 0.06  |      |
| [146]                          | rat     | perm / 8 wk      | WT-rSkM vs SV-rSkM                                              | Histo  | ↓      | <0.05   | 0.62  |      |
| [147]                          | mouse   | 60 min / 240 min | LmiR-con vs LmiR146a                                            | TTC    | ↓      | <0.05   | 0.99  |      |
| [147]                          | mouse   | 60 min / 240 min | con vs LmiR146a                                                 | TTC    | ↓      | <0.05   | 1.00  |      |
| [148]                          | rat     | 35 min / 60 min  | con vs IPC (3mo db Goto-Kakisaki)                               | TTC    | ↓      | <0.005  | 1.00  |      |
| [148]                          | rat     | 35 min / 60 min  | con vs IPC (8mo db Goto-Kakisaki)                               | TTC    | ↓      | <0.005  | 0.97  |      |
| [148]                          | rat     | 35 min / 60 min  | con vs IPC (12mo db Goto-Kakisaki)                              | TTC    | →      | n.s.    | 0.18  |      |
| [148]                          | rat     | 35 min / 60 min  | con vs IPC (18mo db Goto-Kakisaki)                              | TTC    | →      | n.s.    | 0.36  |      |
| [148]                          | rat     | 35 min / 60 min  | con vs IPC (3mo nd Wistar)                                      | TTC    | ↓      | <0.001  | 1.00  |      |
| [148]                          | rat     | 35 min / 60 min  | con vs IPC (8mo nd Wistar)                                      | TTC    | ↓      | <0.005  | 0.99  |      |
| [148]                          | rat     | 35 min / 60 min  | con vs IPC (12mo nd Wistar)                                     | TTC    | ↓      | <0.001  | 1.00  |      |
| [148]                          | rat     | 35 min / 60 min  | con vs IPC (18mo nd Wistar)                                     | TTC    | ↓      | <0.005  | 0.71  |      |
| [149]                          | rat     | 30 min / 120 min | con vs IPC                                                      | TTC    | ↓      | <0.01   | 1.00  |      |
| [149]                          | rat     | 30 min / 120 min | IPC vs IPC +L-NAME                                              | TTC    | ↑      | <0.01   | 1.00  |      |
| [149]                          | rat     | 30 min / 120 min | IPC vs IPC +LY                                                  | TTC    | ↑      | <0.01   | 1.00  |      |
| [149]                          | rat     | 30 min / 120 min | IPC vs IPC +H89                                                 | TTC    | ↑      | <0.01   | 1.00  |      |
| [150]                          | rat     | perm / 1 wk      | EV-F vs EV-CPC-HD                                               | Histo  | ↓      | <0.05   | 0.47  |      |
| [150]                          | rat     | perm / 1 wk      | PBS vs EV-CPC-HD                                                | Histo  | ↓      | <0.05   | 0.19  |      |

|       |        |                  |                                                    |       |   |        |      |
|-------|--------|------------------|----------------------------------------------------|-------|---|--------|------|
| [151] | rat    | 35 min / 120 min | con vs BAY41-2272 3μ                               | TTC   | ↓ | <0.05  | 0.91 |
| [151] | rat    | 35 min / 120 min | con vs BAY41-2272 3μ LNAME                         | TTC   | ↓ | <0.05  | 0.76 |
| [151] | rat    | 35 min / 120 min | con vs BAY41-2272 3μ+CPTIO                         | TTC   | ↓ | <0.05  | 0.47 |
| [151] | rat    | 35 min / 120 min | con vs NOC9 1 n                                    | TTC   | ↓ | <0.05  | 0.64 |
| [151] | rat    | 35 min / 120 min | con vs NOC9 10 n                                   | TTC   | ↓ | <0.01  | 0.95 |
| [151] | rat    | 35 min / 120 min | con vs NOC9 100 n                                  | TTC   | ↓ | <0.001 | 1.00 |
| [151] | rat    | 35 min / 120 min | con vs NOC9 1 μ                                    | TTC   | ↓ | <0.001 | 1.00 |
| [151] | rat    | 35 min / 120 min | con vs BAY60-2770 5 n                              | TTC   | ↓ | <0.01  | 0.86 |
| [151] | rat    | 35 min / 120 min | con vs BAY60-2770 500 n                            | TTC   | ↓ | <0.01  | 0.87 |
| [151] | rat    | 35 min / 120 min | con vs BAY60-2770 50 n                             | TTC   | ↓ | <0.01  | 0.75 |
| [151] | rat    | 35 min / 120 min | con vs BAY60-2770 1 μ                              | TTC   | ↓ | <0.01  | 0.76 |
| [151] | rat    | 35 min / 120 min | con vs BAY60+ODQ                                   | TTC   | ↓ | <0.01  | 0.96 |
| [151] | rat    | 35 min / 120 min | con vs BAY60+C-PTIO                                | TTC   | ↓ | <0.01  | 0.70 |
| [151] | rat    | 35 min / 120 min | con vs BAY60+BAY41                                 | TTC   | ↓ | <0.05  | 0.49 |
| [152] | mouse  | 30 min / 24 h    | WT vs C5aR -/-                                     | TTC   | ↓ | 0.017  | 0.69 |
| [152] | mouse  | 30 min / 24 h    | WT/WT BM vs C5aR-/- C5aR-/- BM                     | TTC   | ↓ | 0.05   | 0.66 |
| [152] | mouse  | 30 min / 24 h    | WT/WT BM vs WT C5aR-/- BM                          | TTC   | ↓ | 0.05   | 0.92 |
| [153] | mouse  | 30 min / 24 h    | SENEP +/- vs SENEP +/-                             | TTC   | ↑ | <0.01  | 0.95 |
| [154] | mouse  | 30 min / 24 h    | WT vs TMLLeD/LeD                                   | TTC   | ↑ | <0.01  | 0.97 |
| [154] | mouse  | 30 min / 24 h    | WT+hydroxycarbamide vs TMLLeD/LeD+hydroxycarbamide | TTC   | ↑ | <0.01  | 1.00 |
| [155] | rat    | 40 min / 2 h     | con vs PoCo                                        | TTC   | ↓ | <0.05  | 1.00 |
| [155] | rat    | 40 min / 2 h     | con vs HMR1766 100nM                               | TTC   | ↓ | <0.05  | 0.91 |
| [155] | rat    | 40 min / 2 h     | kbr7943 vs PoCo+KBR7943                            | TTC   | ↑ | <0.05  | 1.00 |
| [155] | rat    | 40 min / 2 h     | con vs Ataciugat 0.1 ug/kg                         | TTC   | ↓ | <0.05  | 0.78 |
| [155] | rat    | 40 min / 2 h     | con vs thapsigarin                                 | TTC   | ↓ | <0.05  | 1.00 |
| [155] | rat    | 40 min / 2 h     | con vs KT5720                                      | TTC   | ↓ | <0.05  | 0.96 |
| [155] | rat    | 40 min / 2 h     | con vs KN93                                        | TTC   | ↓ | <0.05  | 1.00 |
| [155] | rat    | 40 min / 2 h     | PoCo vs PoCo+KT5823                                | TTC   | ↑ | <0.05  | 1.00 |
| [156] | rat    | 30 min / 24 h    | con vs IPC                                         | TTC   | ↓ | <0.05  | 0.94 |
| [156] | rat    | 30 min / 24 h    | nucleolin OE neg vs nucleolin OE neg+IPC           | TTC   | ↓ | <0.05  | 0.98 |
| [156] | rat    | 30 min / 24 h    | nucleolin OE vs nucleolin OE+IPC                   | TTC   | → | n.s.   | 0.25 |
| [156] | rat    | 30 min / 24 h    | nucleolin OE neg vs nucleolin OE                   | TTC   | ↓ | <0.05  | 0.94 |
| [157] | mouse  | 30 min / 24 h    | sham vs early IPC (WT)                             | TTC   | ↓ | <0.05  | 1.00 |
| [157] | mouse  | 30 min / 24 h    | sham vs late IPC (WT)                              | TTC   | ↓ | <0.05  | 1.00 |
| [157] | mouse  | 30 min / 24 h    | sham vs early IPC (NOX1-/-)                        | TTC   | ↓ | <0.05  | 0.99 |
| [157] | mouse  | 30 min / 24 h    | sham vs late IPC (NOX1-/-)                         | TTC   | → | n.s.   | 0.16 |
| [158] | mouse  | perm / 14 d      | PBS vs EPO-primed mob-PBMC                         | Histo | ↓ | <0.05  | 1.00 |
| [158] | mouse  | perm / 14 d      | veh-primed mob-PBMC vs EPO-primed mob-PBMC         | Histo | ↓ | <0.05  | 0.89 |
| [159] | mouse  | 30 min / 24 h    | fem XX vs fem XY (gonadectomized)                  | TTC   | ↓ | <0.01  | 0.90 |
| [159] | mouse  | 30 min / 24 h    | fem XX vs male XY (gonadectomized)                 | TTC   | ↓ | <0.05  | 0.97 |
| [159] | mouse  | 30 min / 24 h    | male XX vs female XY (gonadectomized)              | TTC   | ↓ | <0.05  | 0.64 |
| [159] | mouse  | 30 min / 24 h    | male XX vs male XY (gonadectomized)                | TTC   | ↓ | <0.05  | 0.85 |
| [159] | mouse  | 30 min / 60 min  | fem XX vs fem XY (gonadectomized)                  | TTC   | ↓ | <0.05  | 0.79 |
| [159] | mouse  | 30 min / 60 min  | fem XX vs male XY (gonadectomized)                 | TTC   | ↓ | <0.05  | 0.88 |
| [159] | mouse  | 30 min / 60 min  | male XX vs female XY (gonadectomized)              | TTC   | ↓ | <0.05  | 0.51 |
| [159] | mouse  | 30 min / 60 min  | male XX vs male XY (gonadectomized)                | TTC   | ↓ | <0.05  | 0.85 |
| [159] | mouse  | 30 min / 60 min  | fem XX vs fem X0                                   | TTC   | ↓ | <0.05  | 0.43 |
| [159] | mouse  | 30 min / 60 min  | fem XX vs male XY                                  | TTC   | ↓ | <0.05  | 0.34 |
| [159] | mouse  | 30 min / 60 min  | male XXY vs female X0                              | TTC   | ↓ | <0.05  | 0.58 |
| [159] | mouse  | 30 min / 60 min  | male XXY vs male XY                                | TTC   | ↓ | <0.05  | 0.47 |
| [160] | mouse  | 30 min / 28 d    | No DOX vs DOX pre MI (rtTA-CnAβ1 mice)             | Histo | ↓ | <0.05  | 0.71 |
| [160] | mouse  | 30 min / 28 d    | No DOX vs DOX post-MI (rtTA-CnAβ1 mice)            | Histo | ↓ | <0.05  | 0.90 |
| [160] | mouse  | 30 min / 28 d    | NoDox vs Dox pre MI (rtTA mice)                    | Histo | → | n.s.   | 0.08 |
| [161] | mouse  | perm / 24 h      | WT vs RIP3 -/-                                     | MRI   | → | n.s.   | 0.11 |
| [162] | mouse  | 30 min / 24 h    | Tie2Cre+ApoE-/- vs Cx40-del                        | TTC   | ↑ | <0.05  | 0.85 |
| [162] | mouse  | 30 min / 24 h    | Cx40fl/flApoE-/- vs Cx40-del                       | TTC   | ↑ | <0.05  | 0.81 |
| [162] | mouse  | 30 min / 24 h    | Cx40-del vs Cx40-del+methotrexate                  | TTC   | ↓ | <0.05  | 0.98 |
| [163] | rat    | 30 min / 24 h    | DMSO vs GSK360A                                    | TTC   | ↓ | <0.05  | 0.89 |
| [163] | rat    | 30 min / 24 h    | DMSO vs GSK360A+ctrl peptide                       | TTC   | → | n.s.   | 0.25 |
| [163] | mouse  | 30 min / 24 h    | WT vs MHC-cre tamoxifen                            | TTC   | ↓ | <0.05  | 0.90 |
| [164] | rat    | 20 min / 120 min | nitrite vs nitrite+pk1                             | TTC   | ↑ | <0.01  | 0.99 |
| [165] | mouse  | 60 min / 28 d    | WT vs CXCR3 KO                                     | Histo | → | n.s.   | 0.11 |
| [166] | mouse  | 45 min / 1 wk    | con vs miR-con                                     | TTC   | → | n.s.   | 0.07 |
| [166] | mouse  | 45 min / 1 wk    | con vs miR-125b                                    | TTC   | ↓ | <0.05  | 1.00 |
| [166] | mouse  | 45 min / 1 wk    | WT vs miR-125b OE                                  | TTC   | ↓ | <0.05  | 1.00 |
| [166] | mouse  | 45 min / 1 wk    | WT vs anti miR-125                                 | TTC   | ↑ | <0.05  | 0.73 |
| [166] | mouse  | 45 min / 1 wk    | anti miR con vs anti miR-125b                      | TTC   | ↑ | <0.05  | 0.88 |
| [167] | mouse  | perm / 28 d      | WT vs E2F1 -/-                                     | Histo | ↓ | <0.01  | 1.00 |
| [168] | mouse  | perm / 4 wk      | MI vs MI+AdsiScr                                   | Histo | → | n.s.   | 0.09 |
| [168] | mouse  | perm / 4 wk      | MI vs MI+AdsiPeli1                                 | Histo | ↓ | <0.05  | 0.97 |
| [169] | pig    | 40 min / 120 min | con vs RIC                                         | TTC   | ↓ | <0.001 | 0.99 |
| [169] | pig    | 40 min / 120 min | con vs GIK                                         | TTC   | ↓ | <0.001 | 0.93 |
| [169] | pig    | 40 min / 120 min | con vs RIC+GIK                                     | TTC   | ↓ | <0.001 | 1.00 |
| [169] | pig    | 40 min / 120 min | con vs exenatide                                   | TTC   | ↓ | <0.001 | 1.00 |
| [169] | pig    | 40 min / 120 min | con vs RIC+exenatide                               | TTC   | ↓ | <0.001 | 1.00 |
| [170] | mouse  | 45 min / 3 h     | WT vs Rip22/2 KO                                   | TTC   | ↑ | <0.05  | 0.60 |
| [171] | mouse  | perm / 25 wk     | WT vs FLNA KO                                      | Histo | ↑ | <0.001 | 0.97 |
| [172] | rabbit | 30 min / 180 min | con vs PoCo                                        | TTC   | ↓ | <0.05  | 1.00 |
| [172] | rabbit | 30 min / 180 min | PoCo vs NaHS                                       | TTC   | ↓ | <0.05  | 1.00 |
| [172] | rabbit | 30 min / 180 min | PoCo vs PoCo+NaHS                                  | TTC   | ↓ | <0.05  | 1.00 |
| [172] | rabbit | 30 min / 180 min | con vs NaHS                                        | TTC   | ↓ | <0.05  | 1.00 |
| [172] | rabbit | 30 min / 180 min | con vs NaHS+TAT                                    | TTC   | ↓ | <0.05  | 1.00 |
| [172] | rabbit | 30 min / 180 min | con vs PoCo +TAT                                   | TTC   | ↓ | <0.05  | 1.00 |
| [172] | rabbit | 30 min / 180 min | con vs NaHS+5HD                                    | TTC   | ↓ | <0.05  | 1.00 |
| [172] | rabbit | 30 min / 180 min | con vs NaHS+glibenclamide                          | TTC   | ↓ | <0.05  | 1.00 |
| [172] | rabbit | 30 min / 180 min | con vs NaHS+LNAME                                  | TTC   | ↓ | <0.05  | 1.00 |
| [172] | mouse  | 30 min / 120 min | con vs PoCo 3x10s                                  | TTC   | ↓ | <0.05  | 1.00 |
| [172] | mouse  | 30 min / 120 min | con vs PoCo 6x10s                                  | TTC   | ↓ | <0.05  | 1.00 |

|       |       |                  |                                                     |       |   |         |        |
|-------|-------|------------------|-----------------------------------------------------|-------|---|---------|--------|
| [172] | mouse | 30 min / 120 min | con vs NaHS                                         | TTC   | ↓ | <0.05   | 1.00   |
| [172] | mouse | 30 min / 120 min | con vs NaHS                                         | TTC   | ↓ | <0.05   | 1.00   |
| [173] | rat   | 30 min / 120 min | con vs H2O2-PC                                      | TTC   | ↓ | <0.01   | 1.00   |
| [173] | rat   | 30 min / 120 min | con vs UCP3 OE                                      | TTC   | ↓ | <0.01   | 0.99   |
| [173] | rat   | 30 min / 120 min | H2O2-PC vs UCP3+H2O2-PC                             | TTC   | ↑ | <0.05   | 0.98   |
| [173] | rat   | 30 min / 120 min | H2O2-PC vs H2O2-PC+ATR                              | TTC   | ↑ | <0.05   | 0.95   |
| [173] | rat   | 30 min / 120 min | H2O2-PC vs UCP3 OE+ATR                              | TTC   | ↑ | <0.01   | 0.95   |
| [173] | rat   | 30 min / 120 min | H2O2-PC vs H2O2-PC+WM                               | TTC   | ↑ | <0.05   | 0.94   |
| [173] | rat   | 30 min / 120 min | UCP3 OE vs UCP3 OE+WM                               | TTC   | ↑ | <0.05   | 0.60   |
| [173] | rat   | 30 min / 120 min | WM vs WM+H2O2-PC                                    | TTC   | ↓ | <0.05   | 0.73   |
| [173] | rat   | 30 min / 120 min | WM vs WM+UCP3 OE                                    | TTC   | ↓ | <0.05   | 0.75   |
| [174] | mouse | 30 min / 120 min | Veh vs NED-K                                        | TTC   | ↓ | <0.05   | 0.80   |
| [174] | mouse | 30 min / 120 min | WT vs TCP1 KO                                       | TTC   | ↓ | <0.05   | 0.86   |
| [175] | mouse | 30 min / 24 h    | con vs LSN2792613                                   | TTC   | ↓ | 0.03    | 0.73   |
| [176] | mouse | 30 min / 60 min  | con vs renalase                                     | TTC   | ↓ | <0.05   | 1.00   |
| [176] | mouse | 30 min / 60 min  | con vs renalase siRNA                               | TTC   | ↓ | <0.05   | 0.96   |
| [176] | mouse | 30 min / 60 min  | con vs HIF1a siRNA                                  | TTC   | ↑ | <0.05   | 1.00   |
| [176] | mouse | 30 min / 60 min  | con vs HIF1a siRNA+veh                              | TTC   | ↑ | <0.05   | 1.00   |
| [176] | mouse | 30 min / 60 min  | con vs HIF1a siRNA+renalase                         | TTC   | ↓ | <0.05   | 0.98   |
| [177] | mouse | perm / 24 h      | con vs chronic hind limb ischemia                   | TTC   | ↑ | <0.05   | 1.00   |
| [177] | mouse | perm / 24 h      | con vs chronic hind limb ischemia                   | Histo | ↑ | <0.05   | 0.89   |
| [178] | mouse | perm / 48 h      | WT vs Gadd45 KO                                     | TTC   | → | n.s.    | 0.22   |
| [179] | rat   | 30 min / 120 min | con vs RIPER                                        | TTC   | ↓ | <0.001  | 1.00   |
| [179] | rat   | 30 min / 120 min | RIPER vs cervical vagotomy+RIPER                    | TTC   | ↓ | <0.01   | 1.00   |
| [179] | rat   | 30 min / 120 min | RIPER vs subdiaphragmatic vagotomy+RIPER            | TTC   | ↑ | <0.01   | 1.00   |
| [179] | rat   | 30 min / 120 min | con vs IPC                                          | TTC   | ↓ | <0.001  | 1.00   |
| [179] | rat   | 30 min / 120 min | con vs IPC +Exendin(9-39)                           | TTC   | ↓ | <0.001  | 1.00   |
| [179] | rat   | 30 min / 120 min | con vs RIPC                                         | TTC   | ↓ | <0.001  | 1.00   |
| [179] | rat   | 30 min / 120 min | con vs RIPER                                        | TTC   | ↓ | <0.001  | 1.00   |
| [179] | rat   | 30 min / 120 min | RIPC vs RIPC+Exendin(9-39)                          | TTC   | ↑ | <0.01   | 0.97   |
| [179] | rat   | 30 min / 120 min | RPER vs RPER+Exendin(9-39)                          | TTC   | ↑ | <0.01   | 1.00   |
| [180] | mouse | 45 min / 24 h    | AKIP OE vs WT                                       | TTC   | ↓ | <0.05   | 0.80   |
| [181] | pig   | 75 min / 1 wk    | rADAMTS13 vs con                                    | Histo | → | n.s.    | 0.32   |
| [182] | mouse | perm / 28 d      | MI vs MI+BAPN                                       | Histo | ↓ | <0.01   | 0.61   |
| [183] | mouse | 45 min / 180 min | KCNE2 +/- vs KCNE2 -/-                              | TTC   | ↓ | <0.05   | 0.78   |
| [183] | mouse | 45 min / 180 min | KCNE2 +/- vs KCNE2 -/-                              | TTC   | ↓ | <0.05   | 0.88   |
| [183] | mouse | 45 min / 180 min | KCNE2 +/- vs KCNE2 +/- +SB216763                    | TTC   | ↓ | <0.05   | 0.77   |
| [183] | mouse | 45 min / 180 min | KCNE2 +/- vs KCNE2 -/- +SB216763                    | TTC   | ↓ | <0.05   | 0.84   |
| [184] | mouse | perm / 28 d      | WT vs IL-12p35 KO                                   | Histo | ↓ | <0.05   | 1.00   |
| [185] | mouse | perm / 14 d      | WT vs LRG KO                                        | Histo | ↑ | <0.01   | 0.92   |
| [186] | rat   | perm / 4 wk      | veh+MI+rAAV9 vs SEN195+MI+rAAV9                     | Histo | ↓ | <0.01   | 0.99   |
| [187] | mouse | 30 min / 24 h    | WT vs ApoM OE                                       | TTC   | ↓ | 0.01    | 0.93   |
| [187] | mouse | 30 min / 60 min  | con vs S1P                                          | TTC   | ↓ | 0.01    | 1.00   |
| [188] | mouse | 20 min / 90 min  | con vs NaHS                                         | TTC   | ↓ | <0.01   | 1.00   |
| [188] | mouse | 20 min / 90 min  | con vs SNAP                                         | TTC   | ↓ | <0.01   | 1.00   |
| [188] | mouse | 20 min / 90 min  | con vs NaHS+SNAP                                    | TTC   | ↓ | <0.01   | 1.00   |
| [188] | mouse | 20 min / 90 min  | con vs 10uM SNAP                                    | TTC   | ↓ | <0.05   | 0.64   |
| [188] | mouse | 20 min / 90 min  | con vs 100uM NaHS                                   | TTC   | ↓ | <0.05   | 0.69   |
| [188] | mouse | 20 min / 90 min  | con vs 10uM SNAP+100uM NaHS                         | TTC   | ↓ | <0.01   | 0.96   |
| [188] | mouse | 20 min / 90 min  | 10uM SNAP vs 10uM SNAP+100uM NaHS                   | TTC   | ↓ | <0.05   | 0.89   |
| [188] | mouse | 20 min / 90 min  | 100uM NaHS vs 10uM SNAP+100uM NaHS                  | TTC   | ↓ | <0.05   | 0.75   |
| [188] | mouse | 20 min / 90 min  | 10uM SNAP+100uM NaHS vs 10uM SNAP+100uM NaHS+C-PTIO | TTC   | ↑ | <0.01   | 0.99   |
| [189] | mouse | perm / 4 wk      | MI+ND vs MI+MK-0626                                 | Histo | → | n.s.    | 0.29   |
| [190] | mouse | 35 min / 60 min  | con vs malonate                                     | TTC   | ↓ | 0.001   | 0.99   |
| [191] | mouse | 35 min / 60 min  | BL plasma vs postRIC plasma                         | TTC   | ↓ | <0.05   | 0.79   |
| [191] | mouse | 35 min / 60 min  | con vs glycine 3mmol                                | TTC   | ↓ | <0.05   | 0.90   |
| [192] | mouse | perm / 1 wk      | anti-miR con vs anti miR-5325p                      | Histo | ↑ | <0.001  | 1.00   |
| [193] | mouse | 30 min / 120 min | con vs PF431396A                                    | TTC   | ↓ | <0.05   | 1.00   |
| [193] | mouse | 30 min / 120 min | con vs PF431396B                                    | TTC   | ↓ | <0.05   | 1.00   |
| [194] | mouse | perm / 24 h      | WT vs periostin KO                                  | TTC   | → | n.s.    | 0.05   |
| [195] | mouse | perm / 28 d      | scramble vs LNA-anti miR-375                        | Histo | ↓ | <0.001  | 1.00   |
| [196] | rat   | 30 min / 120 min | saline vs heparin                                   | TTC   | ↓ | <0.05   | 0.95 ② |
| [196] | rat   | 30 min / 120 min | saline vs FGF1                                      | TTC   | ↓ | <0.05   | 1.00 ② |
| [196] | rat   | 30 min / 120 min | saline vs heparin+FGF1                              | TTC   | ↓ | <0.05   | 1.00 ② |
| [196] | rat   | 30 min / 120 min | saline vs FGF1DHBS                                  | TTC   | ↓ | <0.05   | 1.00 ② |
| [196] | rat   | 30 min / 120 min | saline vs FGF1DHBS +heparin                         | TTC   | ↓ | <0.05   | 1.00 ② |
| [196] | rat   | 30 min / 120 min | heparin vs FGF1                                     | TTC   | ↓ | <0.05   | 0.63 ② |
| [196] | rat   | 30 min / 120 min | heparin vs FGF1DHBS                                 | TTC   | ↓ | <0.05   | 1.00 ② |
| [196] | rat   | 30 min / 120 min | FGF1 vs FGF1DHBS                                    | TTC   | ↓ | <0.05   | 0.86 ② |
| [196] | rat   | 30 min / 120 min | FGF1 vs FGF1DHBS +heparin                           | TTC   | ↓ | <0.05   | 0.14 ② |
| [196] | rat   | 30 min / 120 min | FGF1+heparin vs FGF1                                | TTC   | ↓ | <0.05   | 0.42 ② |
| [196] | rat   | 30 min / 120 min | FGF1+heparin vs FGF1DHBS                            | TTC   | ↓ | <0.05   | 1.00 ② |
| [196] | rat   | 30 min / 120 min | FGF1+heparin vs FGF1DHBS+heparin                    | TTC   | ↓ | <0.05   | 0.84 ② |
| [197] | rat   | 30 min / 24 h    | con vs SNJ-1945                                     | TTC   | ↓ | 0.005   | 0.94   |
| [198] | mouse | 30 min / 24 h    | con vs serelaxin pretreatment                       | TTC   | ↓ | <0.05   | 1.00   |
| [198] | mouse | 30 min / 24 h    | con vs serelaxin pretreatment (eNOS KO)             | TTC   | → | n.s.    | 0.43   |
| [198] | mouse | 30 min / 24 h    | con vs eNOS KO                                      | TTC   | → | n.s.    | 0.42   |
| [198] | mouse | 30 min / 24 h    | con vs serelaxin with reperfusion                   | TTC   | ↓ | <0.05   | 1.00   |
| [198] | mouse | 30 min / 24 h    | con vs serelaxin with reperfusion (eNOS KO)         | TTC   | → | n.s.    | 0.29   |
| [198] | mouse | 30 min / 24 h    | con vs eNOS KO                                      | TTC   | → | n.s.    | 0.29   |
| [199] | mouse | perm / 28 d      | Exo ct vs Exo isch                                  | Histo | → | n.s.    | 0.06   |
| [200] | mouse | 40 min / 24 h    | con vs glutamate                                    | TTC   | ↓ | 0.0063  | 1.00   |
| [200] | mouse | 40 min / 24 h    | glutamate vs glutamate+YM298198                     | TTC   | → | n.s.    | 0.05   |
| [200] | mouse | 40 min / 24 h    | con vs DHPG                                         | TTC   | ↓ | <0.01   | 1.00   |
| [200] | mouse | 40 min / 24 h    | DHPG vs DHPG+YM298198                               | TTC   | → | n.s.    | 0.27   |
| [200] | mouse | 40 min / 60 min  | con vs PoCo                                         | TTC   | ↓ | <0.0001 | 1.00   |
| [200] | mouse | 40 min / 60 min  | con vs DHPH                                         | TTC   | ↓ | <0.05   | 1.00   |
| [200] | mouse | 40 min / 60 min  | con vs DHPH+PoCo                                    | TTC   | ↓ | <0.01   | 1.00   |

|       |       |                  |                                                                        |       |   |         |      |
|-------|-------|------------------|------------------------------------------------------------------------|-------|---|---------|------|
| [200] | mouse | 40 min / 60 min  | con vs PoCo +YM298198                                                  | TTC   | → | n.s.    | 0.44 |
| [201] | mouse | 30 min / 120 min | WT vs Arrb2 KO                                                         | TTC   | ↓ | <0.01   | 0.98 |
| [201] | mouse | 30 min / 120 min | WT vs Arrb2 OE                                                         | TTC   | ↑ | <0.05   | 0.83 |
| [202] | mouse | perm / 14 d      | con vs topiramate                                                      | TTC   | → | n.s.    | 0.09 |
| [203] | rat   | 60 min / 28 d    | Exo-F vs Exo-BMC                                                       | Histo | ↓ | <0.01   | 0.86 |
| [203] | rat   | 60 min / 28 d    | Exo-CpC vs Exo-BMC                                                     | Histo | ↑ | <0.05   | 0.21 |
| [203] | rat   | 60 min / 28 d    | Exo-CpC vs Exo-F                                                       | Histo | ↑ | <0.01   | 0.97 |
| [204] | rat   | perm / 28 d      | PBS vs EV                                                              | Histo | ↑ | <0.05   | 0.88 |
| [204] | rat   | perm / 28 d      | PBS vs STG+EV                                                          | Histo | ↑ | <0.01   | 1.00 |
| [204] | rat   | perm / 28 d      | PBS vs STG+EPC                                                         | Histo | ↑ | <0.01   | 1.00 |
| [204] | rat   | perm / 28 d      | STG vs STG+EV                                                          | Histo | ↑ | <0.01   | 0.98 |
| [204] | rat   | perm / 28 d      | STG vs STG+EPC                                                         | Histo | ↑ | <0.01   | 0.99 |
| [205] | mouse | 30 min / 180 min | con vs RIPC (STAT5 fl/fl)                                              | TTC   | ↓ | <0.01   | 1.00 |
| [206] | mouse | perm / 1 wk      | con vs tb4                                                             | MRI   | → | n.s.    | 0.54 |
| [207] | mouse | perm / 1 wk      | saline vs EGF-A                                                        | Histo | ↓ | <0.05   | 0.99 |
| [207] | mouse | perm / 1 wk      | saline vs Pep2-8                                                       | Histo | ↓ | <0.05   | 0.99 |
| [207] | mouse | perm / 1 wk      | WT vs PCSK9 -/-                                                        | Histo | ↓ | <0.05   | 0.97 |
| [208] | mouse | 30 min / 120 min | WT vs pkn1 KO                                                          | TTC   | ↑ | <0.001  | 1.00 |
| [209] | mouse | 30 min / 120 min | con vs PoCo (CM NO-GC +/fl)                                            | TTC   | ↓ | <0.001  | 1.00 |
| [209] | mouse | 30 min / 120 min | PoCo (CM NO-GC +/fl) vs PoCo (CM NO-GC -/fl)                           | TTC   | ↑ | <0.001  | 1.00 |
| [209] | mouse | 30 min / 120 min | PoCo+cinaciguat (CM NO-GC +/fl) vs PoCo+cinaciguat (CM NO-GC -/fl)     | TTC   | ↑ | <0.001  | 1.00 |
| [209] | mouse | 30 min / 120 min | PoCo+sildenafilfl (CM NO-GC +/fl) vs PoCo+sildenafilfl (CM NO-GC -/fl) | TTC   | ↑ | <0.001  | 1.00 |
| [209] | mouse | 30 min / 120 min | PoCo+TAD (CM NO-GC +/fl) vs PoCo+TAD (CM NO-GC -/fl)                   | TTC   | ↑ | <0.001  | 1.00 |
| [209] | mouse | 30 min / 120 min | con vs NS11021 (+/fl)                                                  | TTC   | ↓ | <0.001  | 1.00 |
| [209] | mouse | 30 min / 120 min | con vs NS11021 (-/fl)                                                  | TTC   | ↓ | <0.001  | 1.00 |
| [210] | mouse | 35 min / 60 min  | con vs acetaldehyde                                                    | TTC   | ↓ | <0.05   | 0.89 |
| [210] | mouse | 35 min / 60 min  | ALDH2*2 KI vs acetaldehyde                                             | TTC   | ↓ | <0.05   | 0.59 |
| [210] | mouse | 35 min / 60 min  | WT vs ALDH2*2 KI+acetaldehyde                                          | TTC   | ↑ | <0.05   | 0.79 |
| [210] | mouse | 35 min / 60 min  | ALDH2*2 KI vs ALDH2*2 KI +acetaldehyde                                 | TTC   | ↑ | <0.05   | 0.87 |
| [210] | mouse | 35 min / 60 min  | con vs ETOH                                                            | TTC   | ↓ | <0.05   | 0.97 |
| [210] | mouse | 35 min / 60 min  | ALDH2*2 KI vs WT+ ETOH                                                 | TTC   | ↓ | <0.05   | 1.00 |
| [210] | mouse | 35 min / 60 min  | WT vsALDH2*2 KI + ETOH                                                 | TTC   | ↑ | <0.05   | 0.62 |
| [210] | mouse | 35 min / 60 min  | ALDH2*2 KI vs ALDH2*2 KI + ETOH                                        | TTC   | ↑ | <0.05   | 0.55 |
| [210] | mouse | 35 min / 60 min  | WT vs WT+ ETOH+ALDA                                                    | TTC   | ↓ | <0.05   | 0.91 |
| [210] | mouse | 35 min / 60 min  | ALDH2*2 KI vs WT+ ETOH+ALDA                                            | TTC   | ↓ | <0.05   | 0.99 |
| [210] | mouse | 35 min / 60 min  | WT vsALDH2*2 KI + ETOH+ALDA                                            | TTC   | ↓ | <0.05   | 0.46 |
| [210] | mouse | 35 min / 60 min  | ALDH2*2 KI vs ALDH2*2 KI + ETOH*ALDA                                   | TTC   | ↓ | <0.05   | 0.75 |
| [210] | mouse | 35 min / 60 min  | ALDH2*2 KI +ETOH vs ALDH2*2 KI +ETOH+ALDA                              | TTC   | ↓ | <0.05   | 1.00 |
| [210] | mouse | 35 min / 60 min  | con vs CVT                                                             | TTC   | ↑ | <0.05   | 1.00 |
| [210] | mouse | 35 min / 60 min  | CVT vs con ETOH                                                        | TTC   | ↓ | <0.05   | 1.00 |
| [210] | mouse | 35 min / 60 min  | CVT vs CVT+ETOH                                                        | TTC   | ↑ | <0.05   | 1.00 |
| [211] | pig   | 60 min / 3 d     | con vs clopidogrel                                                     | MRI   | ↓ | <0.05   | 1.00 |
| [211] | pig   | 60 min / 3 d     | con vs ticagrelor                                                      | MRI   | ↓ | <0.05   | 1.00 |
| [211] | pig   | 60 min / 42 d    | con vs clopidogrel                                                     | MRI   | → | n.s.    | 0.78 |
| [211] | pig   | 60 min / 42 d    | con vs ticagrelor                                                      | MRI   | ↓ | <0.05   | 1.00 |
| [211] | pig   | 60 min / 3 d     | clopidogrel vs ticagrelor                                              | MRI   | ↓ | <0.05   | 1.00 |
| [211] | pig   | 60 min / 3 d     | clopidogrel vs ticagrelor                                              | MRI   | ↓ | <0.05   | 1.00 |
| [211] | pig   | 60 min / 42 d    | 3d vs 42d (con)                                                        | MRI   | ↓ | <0.05   | 1.00 |
| [211] | pig   | 60 min / 42 d    | 3d vs 42d (clopidogrel)                                                | MRI   | ↓ | <0.05   | 1.00 |
| [211] | pig   | 60 min / 42 d    | 3d vs 42d (ticagrelor)                                                 | MRI   | ↓ | <0.05   | 1.00 |
| [211] | pig   | 60 min / 42 d    | con vs clopidogrel                                                     | TTC   | → | n.s.    | 0.87 |
| [211] | pig   | 60 min / 42 d    | con vs ticagrelor                                                      | TTC   | ↓ | <0.05   | 1.00 |
| [211] | pig   | 60 min / 42 d    | clopidogrel vs ticagrelor                                              | TTC   | ↓ | <0.05   | 1.00 |
| [212] | mouse | 45 min / 24 h    | young vs aged                                                          | TTC   | ↑ | <0.05   | 0.44 |
| [212] | mouse | 45 min / 24 h    | young vs aged in SIRT1 KO                                              | TTC   | ↑ | <0.05   | 0.32 |
| [212] | mouse | 45 min / 24 h    | young vs aged                                                          | TTC   | ↑ | <0.05   | 0.43 |
| [212] | mouse | 45 min / 24 h    | aged vs aged+AAVSirt1                                                  | TTC   | ↓ | <0.05   | 0.36 |
| [212] | mouse | 45 min / 24 h    | young vs aged (veh)                                                    | TTC   | ↑ | <0.05   | 0.93 |
| [212] | mouse | 45 min / 24 h    | young veh vs aged A769662                                              | TTC   | ↑ | <0.05   | 0.70 |
| [212] | mouse | 45 min / 24 h    | young A769223 vs aged A769662                                          | TTC   | ↑ | <0.05   | 0.35 |
| [212] | mouse | 45 min / 24 h    | aged veh vs aged A769662                                               | TTC   | ↓ | <0.05   | 0.60 |
| [212] | mouse | 45 min / 24 h    | veh vs A769662 (icSIRT1 KO)                                            | TTC   | ↓ | <0.05   | 0.70 |
| [213] | mouse | 20 min / 60 min  | WT vs MiCK OE                                                          | TTC   | ↓ | 0.045   | 0.40 |
| [213] | mouse | 45 min / 24 h    | WT vs MiCK OE                                                          | TTC   | ↓ | <0.0001 | 1.00 |
| [214] | mouse | perm / 8 wk      | WT vs apn KO                                                           | Histo | → | n.s.    | 0.71 |
| [215] | mouse | perm / 14 d      | con vs sympathetic denervation                                         | Histo | → | n.s.    | 0.08 |
| [216] | mouse | 30 min / 120 min | veh vs NTG A                                                           | TTC   | ↓ | <0.01   | 1.00 |
| [216] | mouse | 30 min / 120 min | NTG A vs NTG-tolerant                                                  | TTC   | ↑ | <0.01   | 1.00 |
| [216] | mouse | 30 min / 120 min | veh vs NTG B                                                           | TTC   | ↓ | <0.05   | 1.00 |
| [216] | mouse | 30 min / 120 min | veh vs CypD-/-                                                         | TTC   | ↓ | <0.01   | 1.00 |
| [216] | mouse | 30 min / 120 min | veh vs CypD-/- +NTG B                                                  | TTC   | ↓ | <0.001  | 1.00 |
| [216] | mouse | 30 min / 120 min | NTG B vs eNOS-/-                                                       | TTC   | ↑ | <0.001  | 1.00 |
| [216] | mouse | 30 min / 120 min | NTG B vs eNOS-/- +NTG B                                                | TTC   | ↑ | <0.01   | 1.00 |
| [216] | mouse | 30 min / 120 min | veh vs ApOE -/- +NTG B                                                 | TTC   | ↓ | <0.01   | 1.00 |
| [216] | mouse | 30 min / 120 min | NTG B vs ApOE-/-                                                       | TTC   | ↑ | <0.05   | 1.00 |
| [216] | mouse | 30 min / 120 min | ApOE-/- vs ApOE -/- +NTG B                                             | TTC   | ↓ | <0.01   | 1.00 |
| [217] | mouse | perm / 1 wk      | p110βFix vs p110β-Tie2                                                 | TTC   | ↓ | <0.05   | 0.94 |
| [217] | mouse | perm / 24 h      | p110β-aMHC vs P110β-FLX                                                | TTC   | ↑ | <0.05   | 0.71 |
| [217] | mouse | perm / 1 wk      | p110β-aMHC vs P110β-FLX                                                | TTC   | ↑ | <0.05   | 0.53 |
| [218] | mouse | 30 min / 24 h    | saline vs TAK-242 1 mg                                                 | TTC   | → | n.s.    | 0.30 |
| [218] | mouse | 30 min / 24 h    | saline vs TAK-242-NP 3 mg                                              | TTC   | ↓ | <0.001  | 1.00 |
| [219] | mouse | 45 min / 120 min | con vs HC067047                                                        | TTC   | ↓ | <0.05   | 0.70 |
| [220] | mouse | perm / 3 mo      | WT vs tenascin-c KO                                                    | Histo | → | n.s.    | 0.20 |
| [221] | mouse | 45 min / 24 h    | con vs AM-001 8 mg                                                     | TTC   | ↓ | <0.01   | 0.94 |
| [221] | mouse | 45 min / 24 h    | veh WT vs AM-001 8 mg WT                                               | TTC   | ↓ | <0.001  | 1.00 |
| [221] | mouse | 45 min / 24 h    | veh WT vs veh Epac1 -/-                                                | TTC   | ↓ | <0.001  | 1.00 |
| [221] | mouse | 45 min / 24 h    | veh WT vs AM-001 8 mg Epac1 -/-                                        | TTC   | ↓ | <0.001  | 1.00 |
| [222] | mouse | 30 min / 120 min | WT vs TGSLT1-KO                                                        | TTC   | ↓ | <0.05   | 0.85 |



|       |        |                  |                                           |       |   |         |      |
|-------|--------|------------------|-------------------------------------------|-------|---|---------|------|
| [222] | mouse  | 20 min / 120 min | WT vs TGSLT1 OE                           | TTC   | ↓ | <0.05   | 0.34 |
| [223] | mouse  | perm / 5 d       | con vs cxcl4                              | TTC   | → | n.s.    | 0.07 |
| [224] | rat    | 30 min / 120 min | con vs isoflurane                         | TTC   | ↓ | <0.05   | 1.00 |
| [224] | rat    | 30 min / 120 min | isoflurane vs nVEGF                       | TTC   | ↑ | <0.05   | 1.00 |
| [224] | rat    | 30 min / 120 min | isoflurane vs isoflurane +nVEGF           | TTC   | ↑ | <0.05   | 0.94 |
| [224] | rat    | 30 min / 120 min | isoflurane vs IgG                         | TTC   | ↑ | <0.05   | 1.00 |
| [224] | rat    | 30 min / 120 min | nVEGF+ISO vs IgG+isoflurane               | TTC   | ↓ | <0.05   | 0.64 |
| [224] | rat    | 30 min / 120 min | con vs IgG+isoflurane                     | TTC   | ↓ | <0.05   | 0.99 |
| [224] | rat    | 30 min / 120 min | IgG vs IgG+isoflurane                     | TTC   | ↓ | <0.05   | 0.94 |
| [225] | rat    | 45 min / 24 h    | con vs H/R-Exo                            | TTC   | ↓ | <0.05   | 1.00 |
| [225] | rat    | 45 min / 24 h    | con vs H/R-p-Exo                          | TTC   | ↓ | <0.01   | 1.00 |
| [225] | rat    | 45 min / 24 h    | H/R-Exo vs H/R-p-Exo                      | TTC   | ↓ | <0.01   | 1.00 |
| [226] | mouse  | perm / 14 d      | con vs Rat IgG                            | Histo | → | n.s.    | 0.12 |
| [226] | mouse  | perm / 14 d      | con vs CAG/CATZ/Rae-1e mice               | Histo | ↓ | <0.05   | 0.89 |
| [227] | rabbit | 30 min / 180 min | con vs Bio A                              | TTC   | ↓ | <0.01   | 1.00 |
| [227] | rabbit | 30 min / 180 min | con vs Bio B                              | TTC   | ↓ | <0.01   | 0.98 |
| [227] | rabbit | 30 min / 180 min | con vs MLS2776                            | TTC   | ↓ | <0.001  | 1.00 |
| [227] | rabbit | 30 min / 180 min | con vs MLS2777                            | TTC   | ↓ | <0.001  | 1.00 |
| [227] | rabbit | 30 min / 180 min | con vs MLS2778                            | TTC   | ↓ | <0.001  | 1.00 |
| [227] | rabbit | 30 min / 180 min | con vs MLS2779                            | TTC   | ↓ | <0.001  | 1.00 |
| [227] | rabbit | 30 min / 120 min | con vs MLS2776                            | TTC   | ↓ | <0.001  | 1.00 |
| [227] | rabbit | 30 min / 120 min | con vs MLS2778                            | TTC   | ↓ | <0.001  | 1.00 |
| [227] | mouse  | 30 min / 120 min | con vs MLS2776+CsA                        | TTC   | ↓ | <0.0001 | 1.00 |
| [227] | mouse  | 30 min / 120 min | con vs MLS2778+CsA                        | TTC   | ↓ | <0.0001 | 1.00 |
| [227] | mouse  | 30 min / 120 min | con vs CsA                                | TTC   | ↓ | <0.0001 | 1.00 |
| [227] | mouse  | 30 min / 120 min | CsA vs MLS2776                            | TTC   | ↓ | <0.001  | 1.00 |
| [227] | mouse  | 30 min / 120 min | CsA vs MLS2778                            | TTC   | ↓ | <0.001  | 1.00 |
| [227] | mouse  | 30 min / 120 min | CsA vs MLS2776+CsA                        | TTC   | ↓ | <0.0001 | 1.00 |
| [227] | mouse  | 30 min / 120 min | CsA vs MLS2778+CsA                        | TTC   | ↓ | <0.0001 | 1.00 |
| [228] | mouse  | perm / 28 d      | DMSO vs JZL184                            | TTC   | ↑ | <0.05   | 0.96 |
| [229] | mouse  | perm / 14 d      | con vs Sp-8-pCPT                          | Histo | ↓ | <0.05   | 0.79 |
| [230] | mouse  | 30 min / 24 h    | FITC-NP vs PIO-NP 0.1 mg/kg               | TTC   | ↓ | <0.05   | 0.87 |
| [230] | mouse  | 30 min / 24 h    | FITC-NP vs PIO-NP 0.3 mg/kg               | TTC   | ↓ | <0.01   | 0.99 |
| [230] | mouse  | 30 min / 24 h    | FITC-NP vs PIO-NP 1 mg/kg                 | TTC   | ↓ | <0.01   | 1.00 |
| [230] | mouse  | 30 min / 24 h    | FITC-NP vs PIO-NP 3 mg/kg                 | TTC   | ↓ | <0.01   | 1.00 |
| [230] | pig    | 60 min / 24 h    | saline vs PIO-NP                          | TTC   | ↓ | <0.005  | 1.00 |
| [230] | pig    | 60 min / 24 h    | FITC-NP vs PIO-NP                         | TTC   | ↓ | <0.005  | 0.94 |
| [231] | mouse  | 25 min / 120 min | con vs empagliflozin (with insulin)       | TTC   | → | n.s.    | 0.07 |
| [231] | mouse  | 25 min / 120 min | con vs cariporide (with insulin)          | TTC   | → | n.s.    | 0.24 |
| [231] | mouse  | 25 min / 120 min | con vs empagliflozin (w.o. insulin)       | TTC   | → | n.s.    | 0.06 |
| [231] | mouse  | 25 min / 120 min | con vs cariporide (w.o. insulin)          | TTC   | ↓ | <0.05   | 0.73 |
| [232] | mouse  | 15 min / 30 min  | WT vs SD2814D                             | TTC   | → | n.s.    | 0.71 |
| [232] | mouse  | 15 min / 30 min  | WT vs PLNKO                               | TTC   | ↑ | <0.05   | 0.98 |
| [232] | mouse  | 15 min / 30 min  | WT vs SDKO                                | TTC   | ↑ | <0.05   | 1.00 |
| [232] | mouse  | 15 min / 30 min  | SD2814D vs SDKO                           | TTC   | ↑ | <0.05   | 1.00 |
| [232] | mouse  | 15 min / 30 min  | PLNKO vs SDKO                             | TTC   | ↑ | <0.05   | 0.95 |
| [233] | mouse  | perm / 7 d       | WT vs Hspb1 -/-                           | TTC   | ↑ | <0.01   | 1.00 |
| [234] | mouse  | 60 min / 1 wk    | WT vs Ldlr-E06-scFv OE                    | TTC   | ↓ | 0.023   | 0.95 |
| [235] | mouse  | 45 min / 3 d     | PBS vs MSC-Exo                            | TTC   | ↓ | <0.0001 | 0.84 |
| [235] | mouse  | 45 min / 3 d     | PBS+CL2MDP vs MSC-Exo                     | TTC   | ↓ | <0.0001 | 1.00 |
| [235] | mouse  | 45 min / 3 d     | PBS+CL2MDP vs MSC-Exo+CL2MDP              | TTC   | ↓ | <0.05   | 0.48 |
| [235] | mouse  | 45 min / 3 d     | MSC-Exo vs MSC-Exo+CL2MDP                 | TTC   | ↑ | <0.001  | 0.70 |
| [236] | mouse  | 40 min / 60 min  | con vs Tat-DAXXp-scramble                 | TTC   | → | n.s.    | 0.08 |
| [236] | mouse  | 40 min / 60 min  | con vs Tat-DAXXp                          | TTC   | ↓ | <0.01   | 0.99 |
| [236] | mouse  | 40 min / 60 min  | Tat-DAXXp-scramble vs Tat-DAXXp           | TTC   | ↓ | <0.05   | 0.50 |
| [236] | mouse  | 40 min / 60 min  | Tat 1 mg vs Tat-DAXXp 1 mg                | TTC   | ↓ | <0.0001 | 0.62 |
| [236] | mouse  | 40 min / 60 min  | Tat 1 mg vs Tat-DAXXp 10 mg               | TTC   | ↓ | <0.01   | 0.48 |
| [236] | mouse  | 40 min / 60 min  | Tat-DAXXp-scramble 1 mg vs TD 1 mg        | TTC   | ↓ | <0.01   | 0.57 |
| [236] | mouse  | 40 min / 24 h    | Tat 1 mg vs Tat-DAXXp 1 mg                | TTC   | ↓ | <0.01   | 0.49 |
| [236] | mouse  | 40 min / 24 h    | Tat 1 mg vs Tat-DAXXp 10 mg               | TTC   | ↓ | <0.001  | 0.55 |
| [236] | mouse  | 40 min / 24 h    | Tat-DAXXp scramble 1 mg vs Tat-DAXXp 1 mg | TTC   | ↓ | <0.05   | 0.67 |
| [237] | mouse  | 40 min / 24 h    | WT vs TXNIP KO                            | TTC   | ↓ | <0.01   | 0.68 |
| [237] | mouse  | 40 min / 24 h    | WT vs TXNIP OE                            | TTC   | ↓ | <0.01   | 0.70 |
| [238] | rat    | perm / 28 d      | con vs MSC-Exo                            | Histo | ↓ | <0.001  | 0.98 |
| [238] | rat    | perm / 28 d      | con vs MSC-ATV-Exo                        | Histo | ↓ | <0.0001 | 1.00 |
| [238] | rat    | perm / 28 d      | MSC-Exo vs MSC-ATV-Exo                    | Histo | ↓ | <0.01   | 0.96 |
| [238] | rat    | perm / 28 d      | con vs MSC-ATV-Exo                        | Histo | ↓ | <0.0001 | 1.00 |
| [238] | rat    | perm / 28 d      | MSC-ATV-Exo vs MSC-ATV(Si)-Exo            | Histo | ↑ | <0.01   | 0.96 |
| [238] | rat    | perm / 28 d      | con vs MSC-(H19)-Exo                      | Histo | ↓ | <0.001  | 0.97 |
| [239] | mouse  | perm / 28 d      | con vs WT-hiSPC-CM                        | Histo | ↓ | <0.05   | 0.88 |
| [239] | mouse  | perm / 28 d      | con vs CDH2-hiSPC-CM                      | Histo | ↓ | <0.05   | 1.00 |
| [239] | mouse  | perm / 28 d      | WT-hiSPC-CM vs CDH2-hiSPC-CM              | Histo | ↓ | <0.05   | 1.00 |
| [240] | rat    | perm / 5 wk      | medium MI vs large MI                     | Histo | ↑ | <0.05   | 0.85 |
| [240] | rat    | perm / 5 wk      | medium MI+PBI vs large MI+PBI             | Histo | ↑ | <0.05   | 1.00 |
| [241] | mouse  | 30 min / 60 min  | con vs rapamycin (c57)                    | TTC   | ↓ | <0.001  | 1.00 |
| [241] | mouse  | 30 min / 60 min  | con vs rapamycin (db/db)                  | TTC   | ↓ | <0.001  | 1.00 |
| [241] | mouse  | 30 min / 60 min  | con (c57) vs con (db/db)                  | TTC   | ↑ | <0.001  | 0.79 |
| [242] | mouse  | perm / 30 d      | MI vs MI+CPCs                             | Histo | ↓ | 0.0096  | 0.95 |
| [243] | mouse  | 60 min / 240 min | veh vs PVS                                | TTC   | ↓ | <0.0001 | 0.44 |
| [244] | mouse  | 20 min / 90 min  | WT vs CypD KI C202s                       | TTC   | ↓ | <0.001  | 0.94 |
| [244] | mouse  | 20 min / 90 min  | WT vs CypD KI C202s (DMSO)                | TTC   | ↓ | <0.001  | 1.00 |
| [244] | mouse  | 20 min / 90 min  | WT vs WT+CsA                              | TTC   | ↓ | <0.001  | 1.00 |
| [244] | mouse  | 20 min / 90 min  | WT vs CypD KI C202s (CsA)                 | TTC   | → | n.s.    | 0.35 |
| [245] | rat    | perm / 28 d      | con vs B8B2+ CSCs                         | Histo | ↓ | <0.05   | 0.70 |
| [246] | mouse  | perm / 28 d      | WT vs S1PR1 KO                            | Histo | ↑ | <0.05   | 1.00 |
| [247] | mouse  | perm / 28 d      | con vs febuxostat                         | Histo | → | n.s.    | 0.07 |
| [248] | rat    | perm / 6 wk      | con vs ANG1-hiPSC-aCM                     | Histo | ↓ | 0.029   | 0.91 |
| [249] | mouse  | 30 min / 24 h    | WT vs SETD KO                             | TTC   | ↓ | 0.0039  | 0.85 |

|                             |         |                  |                                                 |        |        |         |       |      |
|-----------------------------|---------|------------------|-------------------------------------------------|--------|--------|---------|-------|------|
| [250]                       | mouse   | perm / 24 h      | WT vs GRK5 OE                                   | TTC    | →      | n.s.    | 0.14  |      |
| [251]                       | mouse   | 45 min / 24 h    | con vs selectin-targeting glycoalkaloid mimetic | TTC    | ↓      | <0.05   | 0.63  |      |
| [252]                       | mouse   | perm / 21 d      | WT vs FUCCI R26Rp-mice                          | Histo  | →      | n.s.    | 0.14  |      |
| [253]                       | mouse   | 20 min / 90 min  | WT vs Ogfod1 KO                                 | TTC    | ↓      | 0.0001  | 1.00  |      |
| [253]                       | mouse   | 40 min / 24 h    | WT vs Ogfod1 KO                                 | TTC    | ↓      | 0.028   | 0.90  |      |
| [253]                       | mouse   | 20 min / 90 min  | WT vs WT+carosine                               | TTC    | ↓      | <0.0001 | 0.83  |      |
| [254]                       | rat     | 30 min / 90 min  | con vs CAA0225                                  | TTC    | ↓      | <0.05   | 1.00  |      |
| [254]                       | mouse   | 45 min / 2 wk    | con vs CAA0225                                  | TTC    | ↓      | <0.05   | 0.87  |      |
| [254]                       | mouse   | 30 min / 120 min | con vs CAA0225                                  | TTC    | ↓      | <0.05   | 0.52  |      |
| [255]                       | mouse   | perm / 21 d      | WT vs FGF10 +/-                                 | Histo  | ↑      | <0.001  | 0.71  |      |
| [255]                       | mouse   | perm / 5d        | WT vs FGF10 +/-                                 | Histo  | ↑      | <0.01   | 0.51  |      |
| [255]                       | mouse   | perm / 21 d      | con vs DOX                                      | Histo  | ↓      | <0.05   | 0.29  |      |
| [256]                       | mouse   | 60 min / 120 min | con vs hyalalacine                              | TTC    | ↓      | 0.0003  | 1.00  |      |
| [256]                       | mouse   | 60 min / 120 min | con vs hyalalacine                              | TTC    | ↓      | 0.0083  | 0.89  |      |
| [257]                       | mouse   | perm / 4 wk      | WT vs Col1a2Cre(ER) OE                          | Histo  | ↓      | 0.0103  | 0.91  |      |
| [257]                       | mouse   | perm / 4 wk      | R26 Yap5SA vs Col1a2 cre(ER) OE                 | Histo  | ↑      | 0.0482  | 0.64  |      |
| [258]                       | rat     | 45 min / 120 min | con vs mCBS                                     | TTC    | ↓      | <0.05   | 0.30  |      |
| [258]                       | rat     | 45 min / 120 min | con vs IPC                                      | TTC    | ↓      | <0.001  | 0.99  |      |
| [258]                       | rat     | 30 min / 120 min | veh vs histones 20ug                            | TTC    | ↑      | <0.05   | 0.98  |      |
| [258]                       | rat     | 30 min / 120 min | histones 10ug vs histones 20ug                  | TTC    | ↑      | <0.01   | 1.00  |      |
| [258]                       | rat     | 30 min / 120 min | veh vs HIPe                                     | TTC    | ↓      | <0.01   | 0.84  |      |
| [259]                       | mouse   | perm / 48 h      | PBS vs IL-5                                     | TTC    | ↓      | <0.05   | 0.82  |      |
| [259]                       | mouse   | perm / 28 d      | PBS vs IL-5                                     | Histo  | ↓      | <0.05   | 0.94  |      |
| [259]                       | mouse   | perm / 28 d      | PBS vs PBS +TRFK5                               | Histo  | ↑      | <0.05   | 0.96  |      |
| [259]                       | mouse   | perm / 28 d      | PBS vs IL5+TRFK5                                | Histo  | ↑      | <0.05   | 0.87  |      |
| [259]                       | mouse   | perm / 28 d      | IL5 vs TRFK5+PBS                                | Histo  | ↑      | <0.05   | 1.00  |      |
| [259]                       | mouse   | perm / 28 d      | IL5 vs TRFK5+IL5                                | Histo  | ↑      | <0.05   | 1.00  |      |
| [260]                       | mouse   | perm / 24 h      | con vs miR126 antagomir                         | TTC    | ↓      | <0.01   | 0.43  |      |
| [261]                       | pig     | 45 min / 1 wk    | normothermia vs hypothermia                     | MRI    | →      | n.s.    | 0.11  |      |
| [262]                       | mouse   | perm / 24 wk     | con vs ferric carboxymaltose                    | Histo  | →      | n.s.    | 0.14  |      |
| [263]                       | mouse   |                  | 0 WT vs 146a-5p -/-                             | TTC    | ↑      | <0.001  | 1.00  |      |
| [263]                       | mouse   | perm / 1 wk      | adult vs aging                                  | Histo  | ↑      | <0.01   | 0.99  |      |
| [264]                       | rat     | perm / 21 d      | MI vs early RvD1                                | Histo  | ↓      | 0.009   | 1.00  |      |
| [265]                       | pig     | 60 min / 180 min | pla vs IPC (female)                             | TTC    | ↓      | 0.0003  | 0.91  |      |
| [265]                       | pig     | 60 min / 180 min | pla vs IPC (castrated male)                     | TTC    | ↓      | 0.0179  | 0.54  |      |
| [265]                       | pig     | 60 min / 180 min | pla vs IPC (male)                               | TTC    | ↓      | <0.0001 | 0.95  |      |
| [266]                       | mouse   | perm / 8 wk      | WT vs clock D19/D19                             | Histo  | ↓      | <0.05   | 0.72  | ②    |
| [266]                       | mouse   | perm / 8 wk      | cre-WT vs Sm-Bmal KO                            | Histo  | ↓      | <0.05   | 0.99  | ②    |
| [267]                       | mouse   | 30 min / 24 h    | WT vs p55y OE                                   | TTC    | ↓      | 0.0003  | 0.99  | ②    |
| [268]                       | mouse   | perm / 28 d      | WT vs ILC2s deficiency                          | Histo  | →      | n.s.    | 0.11  |      |
| [269]                       | mouse   | perm / 28 d      | con vs 4TTC-hCMP                                | Histo  | ↓      | <0.05   | 0.98  |      |
| [269]                       | mouse   | perm / 28 d      | 3TTC-hCMP vs 4TTC-hCMP>                         | Histo  | ↓      | <0.05   | 0.99  |      |
| [270]                       | mouse   | 30 min / 24 h    | WT vs Panx -/-                                  | TTC    | →      | n.s.    | 0.48  |      |
| [270]                       | mouse   | 30 min / 60 min  | con vs IPC                                      | TTC    | ↓      | <0.05   | 0.55  |      |
| [271]                       | rat     | 30 min / 120 min | con vs IPC (Budapest study group)               | TTC    | ↓      | <0.05   | 1.00  |      |
| [271]                       | rat     | 30 min / 120 min | IPC vs RICuni (Budapest study group)            | TTC    | ↑      | <0.05   | 1.00  |      |
| [271]                       | rat     | 30 min / 120 min | IPC vs RICbi (Budapest study group)             | TTC    | ↑      | <0.05   | 1.00  |      |
| [271]                       | rat     | 30 min / 120 min | con vs IPC (Szeged study group)                 | TTC    | ↓      | <0.05   | 0.96  |      |
| [271]                       | rat     | 30 min / 120 min | IPC vs RICbi (Szeged study group)               | TTC    | ↑      | <0.05   | 0.88  |      |
| [272]                       | rat     | perm / 28 d      | veh vs galectin-3                               | Histo  | ↓      | <0.05   | 0.76  | ①    |
| [272]                       | mouse   | perm / 56 d      | veh vs galectin-3                               | Histo  | →      | n.s.    | 0.81  | ①    |
| [272]                       | mouse   | perm / 56 d      | losartan vs galectin-3                          | Histo  | →      | n.s.    | 0.74  | ①    |
| [273]                       | mouse   | 60 min / 3 d     | con vs mixture of antibiotics                   | TTC    | ↓      | <0.001  | 1.00  |      |
| [273]                       | mouse   | 60 min / 3 d     | con vs GLP-2                                    | TTC    | ↓      | <0.0001 | 1.00  |      |
| <b>Circulation Research</b> |         |                  |                                                 |        |        |         |       |      |
| ref.                        | species | I/R timing       | intervention                                    | method | effect | p-value | power | note |
| [274]                       | mouse   | 50 min / 24 h    | WT vs CD73-/-                                   | MRI    | →      | n.s.    | 0.12  |      |
| [275]                       | mouse   | perm / 24 h      | Saline vs CDC                                   | TTC    | →      | n.s.    | 0.20  |      |
| [275]                       | mouse   | perm / 24 h      | Saline vs CBSC                                  | TTC    | →      | n.s.    | 0.07  |      |
| [275]                       | mouse   | perm / 6 wk      | Saline vs CDC                                   | Histo  | ↓      | <0.05   | 0.89  |      |
| [275]                       | mouse   | perm / 6 wk      | Saline vs CBSC                                  | Histo  | ↓      | <0.01   | 1.00  |      |
| [276]                       | sheep   | 90 min / 8 wk    | con vs all treated (salvage index)              | TTC    | ↑      | 0.002   | 0.96  |      |
| [276]                       | sheep   | 90 min / 8 wk    | con vs all treated                              | TTC    | ↓      | <0.001  | 0.99  |      |
| [277]                       | mouse   | 45 min / 24 h    | nSI vs mRNA-26a                                 | TTC    | ↓      | <0.05   | 0.44  |      |
| [278]                       | mouse   | 40 min / 60 min  | WT vs HAX1-1 OE                                 | TTC    | ↓      | <0.05   | 0.87  |      |
| [278]                       | mouse   | 30 min / 24 h    | WT vs HAX1-1 OE                                 | TTC    | ↓      | <0.05   | 0.27  |      |
| [278]                       | mouse   | 30 min / 24 h    | WT vs HAX1-1 +/-                                | TTC    | ↑      | <0.05   | 0.98  |      |
| [279]                       | mouse   | 60 min / 24 h    | WT vs CaMKIIδ KO                                | TTC    | ↓      | <0.05   | 0.43  |      |
| [279]                       | mouse   | 60 min / 24 h    | fl/fl vs c-CaMKIIδ KO                           | TTC    | ↓      | <0.05   | 0.74  |      |
| [280]                       | mouse   | perm / 6 wk      | WT vs creatine KO                               | Histo  | →      | n.s.    | 0.16  |      |
| [281]                       | mouse   | perm / 24 h      | WT vs MMP-28 -/- 1d                             | TTC    | →      | n.s.    | 0.08  |      |
| [281]                       | mouse   | perm / 3 d       | WT vs MMP-28 -/- 3d                             | TTC    | →      | n.s.    | 0.27  |      |
| [281]                       | mouse   | perm / 5 d       | WT vs MMP-28 -/- 5d                             | TTC    | →      | n.s.    | 0.08  |      |
| [281]                       | mouse   | perm / 7 d       | WT vs MMP-28 -/- 7d                             | TTC    | →      | n.s.    | 0.09  |      |
| [282]                       | mouse   | 30 min / 24 h    | WT vs NOX4 KO                                   | TTC    | ↓      | <0.05   | 0.69  |      |
| [282]                       | mouse   | 30 min / 24 h    | WT vs NOX2 KO                                   | TTC    | ↓      | <0.05   | 0.59  |      |
| [282]                       | mouse   | 30 min / 24 h    | nonOE vs vs DN-NOX OE                           | TTC    | ↑      | <0.05   | 0.86  |      |
| [282]                       | mouse   | 30 min / 24 h    | WT vs DN NOX OE                                 | TTC    | ↑      | <0.01   | 1.00  |      |
| [282]                       | mouse   | 30 min / 24 h    | DN-NOX OE vs DN-NOX OE +PHD2 +/-                | TTC    | ↓      | <0.05   | 0.97  |      |
| [282]                       | mouse   | 30 min / 24 h    | WT vs DN NOX OE                                 | TTC    | ↑      | <0.01   | 1.00  |      |
| [282]                       | mouse   | 30 min / 24 h    | DN NOX OE vs DN NOX OE PPAR2a -/-               | TTC    | ↓      | <0.05   | 0.97  |      |
| [283]                       | mouse   | 180 min / 0 min  | con vs NOX4 KO                                  | TTC    | ↑      | <0.05   | 0.83  |      |
| [284]                       | mouse   | perm / 24 h      | disrupted MI vs normal MI                       | TTC    | →      | n.s.    | 0.17  |      |
| [284]                       | mouse   | perm / 1 wk      | disrupted MI vs normal MI                       | Histo  | ↑      | <0.01   | 0.76  |      |
| [285]                       | mouse   | perm / 24 h      | con vs sorefenib                                | TTC    | →      | n.s.    | 0.49  |      |
| [286]                       | mouse   | perm / 1 wk      | con vs gene transfer of activated Notch1        | Histo  | →      | n.s.    | 0.23  |      |
| [286]                       | mouse   | perm / 1 wk      | con vs gene transfer of activated sj1           | Histo  | →      | n.s.    | 0.12  |      |

|       |        |                  |                                                                          |       |   |         |      |
|-------|--------|------------------|--------------------------------------------------------------------------|-------|---|---------|------|
| [286] | mouse  | perm / 60 d      | con vs gene transfer of activated Notch1                                 | Histo | → | n.s.    | 0.19 |
| [286] | mouse  | perm / 60 d      | con vs gene transfer of activated sJ1                                    | Histo | → | n.s.    | 0.06 |
| [287] | mouse  | perm / 5 wk      | con vs YAP OE                                                            | Histo | ↓ | 0.018   | 0.84 |
| [288] | mouse  | perm / 24 h      | WT vs pla 2R -/-                                                         | TTC   | → | n.s.    | 0.24 |
| [289] | mouse  | perm / 24 h      | con vs TGFβ receptor-KO                                                  | TTC   | → | n.s.    | 0.62 |
| [290] | mouse  | 30 min / 24 h    | con vs RIPC                                                              | TTC   | ↓ | <0.001  | 1.00 |
| [290] | mouse  | 30 min / 24 h    | con vs RIPC+NO scavenging                                                | TTC   | → | n.s.    | 0.08 |
| [290] | mouse  | 30 min / 60 min  | con vs RIPC                                                              | TTC   | ↓ | <0.05   | 0.68 |
| [290] | mouse  | 30 min / 60 min  | con vs RIPC wo. RH+Exogen NO                                             | TTC   | ↓ | <0.05   | 0.90 |
| [291] | mouse  | perm / 1 wk      | con vs Foxp3DTR Treg cell ablation                                       | Histo | ↑ | <0.05   | 0.72 |
| [292] | mouse  | perm / 7 d       | PBS vs diphtheria toxin                                                  | Histo | → | n.s.    | 0.12 |
| [292] | mouse  | perm / 7 d       | PBS vs diphtheria toxin+IL10 KO                                          | Histo | → | n.s.    | 0.10 |
| [293] | mouse  | 20 min / 120 min | con vs IPC                                                               | TTC   | ↓ | <0.05   | 1.00 |
| [293] | mouse  | 20 min / 120 min | con+wortmannin vs IPC+wortmannin                                         | TTC   | → | n.s.    | 0.42 |
| [293] | mouse  | 20 min / 120 min | con+KU63794 vs IPC+KU63794                                               | TTC   | → | n.s.    | 0.35 |
| [293] | mouse  | 20 min / 120 min | con vs IPC+pp242                                                         | TTC   | ↓ | <0.05   | 0.14 |
| [293] | mouse  | 20 min / 120 min | con vs IPC+rapamycin                                                     | TTC   | ↓ | <0.05   | 1.00 |
| [294] | mouse  | perm / 21 d      | WT vs human TIMP-4 OE                                                    | Histo | → | n.s.    | 0.05 |
| [295] | mouse  | perm / 14 d      | veh vs saphenous vein-derived pericytes (SVP)+cardiac stem cells ( CSC ) | Histo | ↓ | <0.05   | 0.93 |
| [296] | mouse  | 30 min / 4 h     | WT vs GSTP-null                                                          | TTC   | ↑ | <0.05   | 0.86 |
| [297] | mouse  | 30 min / 24 h    | con vs Drp1-C KO                                                         | TTC   | ↑ | <0.05   | 0.97 |
| [298] | mouse  | perm / 5-6 wk    | WT vs protein 1 Cre-tandem dimer Tomato OE                               | Histo | ↓ | 0.046   | 0.67 |
| [299] | mouse  | 30 min / 48 h    | con vs IPC in mice                                                       | TTC   | ↓ | <0.0001 | 1.00 |
| [299] | rabbit | 45 min / 72 h    | con vs IPC in rabbits                                                    | TTC   | ↓ | <0.0001 | 1.00 |
| [299] | pig    | 60 min / 72 h    | con vs IPC in pigs                                                       | TTC   | ↓ | 0.0121  | 0.84 |
| [300] | mouse  | perm / 8 wk      | PBS vs mES Ex-CPC                                                        | Histo | ↓ | <0.01   | 0.76 |
| [300] | mouse  | perm / 8 wk      | PBS vs mEF EX-CPC                                                        | Histo | → | n.s.    | 0.11 |
| [300] | mouse  | perm / 8 wk      | MEF Ex-CPC vs mES Ex-CPC                                                 | Histo | ↓ | <0.01   | 0.86 |
| [301] | mouse  | perm / 1 wk      | con vs MIPC S                                                            | MRI   | ↓ | <0.01   | 1.00 |
| [301] | mouse  | perm / 2 wk      | con vs MIPC S                                                            | MRI   | ↓ | <0.01   | 1.00 |
| [301] | mouse  | perm / 4 wk      | con vs MIPC S                                                            | MRI   | ↓ | <0.01   | 1.00 |
| [301] | mouse  | perm / 1/4 wk    | MIPC S 1 wk vs MIPC S 4 wk                                               | Histo | ↓ | <0.05   | 0.99 |
| [302] | rat    | 60 min / 24 h    | con vs eng. heart muscle                                                 | MRI   | → | n.s.    | 0.14 |
| [302] | rat    | 60 min / 28 d    | con vs eng. heart muscle                                                 | MRI   | → | n.s.    | 0.06 |
| [302] | rat    | 60 min / 24 h    | con vs eng. heart muscle (irradiated)                                    | MRI   | → | n.s.    | 0.07 |
| [302] | rat    | 60 min / 28 d    | con vs eng. heart muscle (irradiated)                                    | MRI   | → | n.s.    | 0.16 |
| [303] | pig    | 60 min / 180 min | pla vs RIPC                                                              | TTC   | ↓ | <0.05   | 1.00 |
| [303] | pig    | 60 min / 180 min | pla vs RIPC+RISK-BL                                                      | TTC   | ↓ | <0.05   | 1.00 |
| [303] | pig    | 60 min / 180 min | pla vs RIPC+SAFE-BL                                                      | TTC   | → | n.s.    | 0.11 |
| [303] | pig    | 60 min / 180 min | RIPC vs RIPC +SAFE-BL                                                    | TTC   | ↑ | <0.05   | 0.97 |
| [303] | rat    | 30 min / 120 min | pPLA vs pRIPC                                                            | TTC   | ↓ | <0.05   | 1.00 |
| [303] | rat    | 30 min / 120 min | pPLA +RISK-BL vs pRIPC                                                   | TTC   | ↓ | <0.05   | 1.00 |
| [303] | rat    | 30 min / 120 min | pPLA +SAFE-BL vs pRIPC                                                   | TTC   | ↓ | <0.05   | 1.00 |
| [303] | rat    | 30 min / 120 min | pRIPC vs pRIPC +RISK-BL                                                  | TTC   | ↑ | <0.05   | 1.00 |
| [303] | rat    | 30 min / 120 min | pRIPC vs pRIPC +SAFE-BL                                                  | TTC   | ↑ | <0.05   | 1.00 |
| [304] | mouse  | perm / 3 d       | WT vs Osteoglycin null                                                   | Histo | → | n.s.    | 0.06 |
| [305] | mouse  | perm / 3-7 d     | IS day 3 vs IS day 7 (neonates)                                          | Histo | ↓ | <0.05   | 1.00 |
| [305] | mouse  | perm / 3-7 d     | IS day 3 vs IS day 7 (adult)                                             | Histo | → | n.s.    | 0.28 |
| [306] | mouse  | perm / 7 d       | WT vs FOXO4 -/-                                                          | Histo | ↓ | <0.05   | 0.89 |
| [307] | mouse  | perm / 48 h      | con vs Gca KO                                                            | TTC   | ↓ | <0.05   | 0.88 |
| [308] | rat    | perm / 24 h      | con vs renal denervation (SHR rat)                                       | TTC   | ↓ | <0.01   | 0.94 |
| [308] | rat    | perm / 24 h      | con vs renal denervation (WKY rat)                                       | TTC   | → | n.s.    | 0.31 |
| [309] | rat    | 90 min / 12 mo   | veh vs CPC                                                               | Histo | ↓ | <0.01   | 0.90 |
| [310] | mouse  | 30 min / 72 h    | WT vs GRK2 KO                                                            | TTC   | ↓ | <0.05   | 0.80 |
| [311] | mouse  | 30 min / 24 h    | con vs γ2-AMPK cKO                                                       | TTC   | ↑ | <0.05   | 1.00 |
| [311] | mouse  | 30 min / 24 h    | WT vs γ2-AMPK OE                                                         | TTC   | ↓ | <0.05   | 1.00 |
| [311] | mouse  | 30 min / 24 h    | WT veh vs WT+TUDCA                                                       | TTC   | ↓ | <0.05   | 1.00 |
| [311] | mouse  | 30 min / 24 h    | WT veh vs γ2-AMPK OE+TUDCA                                               | TTC   | ↓ | <0.05   | 1.00 |
| [312] | mouse  | 45 min / 4 h     | MerTK+/+ vs MerTK-/-                                                     | TTC   | ↓ | <0.01   | *    |
| [312] | mouse  | 45 min / 1 wk    | MerTK+/+ vs CR/CR                                                        | TTC   | ↓ | <0.01   | *    |
| [312] | mouse  | 45 min / 1 wk    | MerTK+/+ vs MerTK-/- in LysM-Cre                                         | TTC   | ↑ | <0.05   | *    |
| [313] | mouse  | 45 min / 24 h    | WT vs MitEpac1 -/-                                                       | TTC   | ↓ | <0.01   | 0.91 |
| [314] | pig    | 40 min / 120 min | con vs PoCo                                                              | MRI   | ↑ | <0.05   | 0.68 |
| [314] | pig    | 40 min / 120 min | con vs IPC                                                               | MRI   | ↓ | <0.05   | 1.00 |
| [314] | pig    | 20 min / 120 min | 40 min I vs 20 min I                                                     | MRI   | ↓ | <0.05   | 1.00 |
| [314] | pig    | 40 min / 24 h    | con vs PoCo                                                              | MRI   | → | n.s.    | 0.36 |
| [314] | pig    | 40 min / 24 h    | con vs IPC                                                               | MRI   | ↓ | <0.05   | 0.72 |
| [314] | pig    | 20 min / 24 h    | 40 min I vs 20 min I                                                     | MRI   | ↓ | <0.05   | 1.00 |
| [314] | pig    | 40 min / 4 d     | con vs PoCo                                                              | MRI   | ↑ | <0.05   | 0.43 |
| [314] | pig    | 40 min / 4 d     | con vs IPC                                                               | MRI   | ↓ | <0.05   | 1.00 |
| [314] | pig    | 20 min / 4 d     | 40 min I vs 20 min I                                                     | MRI   | ↓ | <0.05   | 1.00 |
| [314] | pig    | 40 min / 7 d     | con vs PoCo                                                              | MRI   | ↑ | <0.05   | 0.60 |
| [314] | pig    | 40 min / 7 d     | con vs IPC                                                               | MRI   | ↓ | <0.05   | 1.00 |
| [314] | pig    | 20 min / 7 d     | 40 min I vs 20 min I                                                     | MRI   | ↓ | <0.05   | 1.00 |
| [315] | mouse  | perm / 4 wk      | MI vs MI+hCMP                                                            | Histo | ↓ | <0.05   | 0.79 |
| [315] | mouse  | perm / 4 wk      | MI+Scaffold vs MI+hCMP                                                   | Histo | ↓ | <0.05   | 0.78 |
| [316] | mouse  | perm / 8 wk      | con vs miR199a-3p                                                        | Histo | ↓ | <0.01   | 0.69 |
| [316] | mouse  | perm / 8 wk      | con vs miR590-3p                                                         | Histo | ↓ | <0.01   | 0.95 |
| [317] | mouse  | 45 min / 20 d    | no MSCs vs MSCs                                                          | TTC   | → | n.s.    | 0.11 |
| [318] | mouse  | perm / 15 d      | con vs syn MSC                                                           | Histo | ↓ | <0.05   | 0.84 |
| [318] | mouse  | perm / 15 d      | con vs MSC                                                               | Histo | ↓ | <0.05   | 0.96 |
| [319] | pig    | 90 min / 72 h    | veh vs CBSCs (72h)                                                       | TTC   | → | n.s.    | 0.07 |
| [319] | pig    | 90 min / 3 mo    | veh vs CBSCs (3wk)                                                       | TTC   | ↓ | <0.05   | 0.82 |
| [320] | mouse  | perm / 28 d      | con vs ANG-II                                                            | Histo | ↑ | <0.01   | 1.00 |
| [321] | mouse  | perm / 2/4 wk    | con 2wk vs con 4wk                                                       | MRI   | ↑ | <0.05   | 0.27 |
| [321] | mouse  | perm / 2/4 wk    | hCMs 2wk vs hCMs 4wk                                                     | MRI   | ↓ | <0.05   | 0.22 |
| [321] | mouse  | perm / 4 wk      | con 4wk vs hCMs 4wk                                                      | MRI   | ↓ | <0.05   | 0.72 |
| [321] | mouse  | perm / 4 wk      | hESCs 4wk vs hCMs 4wk                                                    | MRI   | ↓ | <0.05   | 0.54 |

|       |        |                  |                                                 |       |   |        |          |
|-------|--------|------------------|-------------------------------------------------|-------|---|--------|----------|
| [321] | mouse  | perm / 2/4 wk    | con 4wk vs iCms 4 wk                            | MRI   | ↓ | <0.05  | 0.35     |
| [321] | mouse  | perm / 4 wk      | IPSCs 4wk vs iCms 4 wk                          | MRI   | ↓ | <0.09  | 0.25     |
| [322] | mouse  | perm / 48 h      | WT vs D2 KO                                     | TTC   | ↓ | <0.001 | 0.99     |
| [322] | mouse  | perm / 14 d      | WT vs D2 KO                                     | Histo | ↓ | <0.001 | 0.95     |
| [322] | mouse  | perm / 28 d      | WT vs D2 KO                                     | Histo | → | n.s.   | 0.09     |
| [323] | mouse  | 20 min / 120 min | GSNO-R +/- vs GSNO-R -/- in male                | TTC   | ↓ | <0.05  | 0.54 (2) |
| [323] | mouse  | 20 min / 120 min | GSNO-R +/- vs GSNO-R -/- in female              | TTC   | ↑ | <0.05  | 0.70 (2) |
| [323] | mouse  | 25 min / 24 h    | GSNO-R +/- vs GSNO-R -/- in male                | TTC   | ↓ | <0.05  | 0.71 (2) |
| [323] | mouse  | 25 min / 24 h    | GSNO-R +/- vs GSNO-R -/- in female              | TTC   | ↑ | <0.05  | 0.80 (2) |
| [323] | mouse  | 20 min / 120 min | GSNO-R +/- vs GSNO-R -/- in male                | TTC   | ↓ | <0.05  | 0.91 (2) |
| [323] | mouse  | 20 min / 120 min | GSNO-R +/- vs GSNO-R +/- in male+Alda-1         | TTC   | ↓ | <0.05  | 0.64 (2) |
| [323] | mouse  | 20 min / 120 min | GSNO-R +/- vs GSNO-R -/- in male+Alda-1         | TTC   | ↓ | <0.05  | 0.83 (2) |
| [323] | mouse  | 20 min / 120 min | GSNO-R +/- vs GSNO-R -/- in female              | TTC   | ↑ | <0.01  | 0.92 (2) |
| [323] | mouse  | 20 min / 120 min | GSNO-R +/- vs GSNO-R -/- in female +Alda-1      | TTC   | ↓ | <0.05  | 0.18 (2) |
| [324] | pig    | 60 min / 180 min | con vs RIPC                                     | TTC   | ↓ | <0.001 | 1.00     |
| [325] | pig    | 60 min / 180 min | con vs RIPC                                     | TTC   | ↓ | <0.001 | 1.00     |
| [325] | pig    | 60 min / 180 min | vagotomy vs RIPC                                | TTC   | ↓ | <0.001 | 1.00     |
| [325] | pig    | 60 min / 180 min | SPLX vs RIPC                                    | TTC   | ↓ | <0.001 | 0.85     |
| [325] | pig    | 60 min / 180 min | vagotomy vs vagotomy+RIPC                       | TTC   | ↓ | <0.001 | 0.91     |
| [325] | pig    | 60 min / 180 min | RIPC vs vagotomy+RIPC                           | TTC   | ↑ | <0.001 | 0.75     |
| [325] | pig    | 60 min / 180 min | RIPC vs SPLX+RIPC                               | TTC   | ↑ | <0.001 | 0.73     |
| [325] | pig    | 60 min / 180 min | RIPC vs splenic denervation+RIPC                | TTC   | ↑ | <0.001 | 0.96     |
| [325] | rat    | 30 min / 120 min | con vs RIPC                                     | TTC   | ↓ | <0.05  | 1.00     |
| [325] | rat    | 30 min / 120 min | RIPC vs vagotomy+RIPC                           | TTC   | ↑ | <0.05  | 1.00     |
| [325] | rat    | 30 min / 120 min | RIPC vs SPLX+RIPC                               | TTC   | ↑ | <0.05  | 1.00     |
| [325] | rat    | 30 min / 120 min | RIPC vs splenic denervation+RIPC                | TTC   | ↑ | <0.05  | 1.00     |
| [325] | rat    | 30 min / 120 min | ppla vs pRIPC                                   | TTC   | ↓ | <0.05  | 1.00     |
| [325] | rat    | 30 min / 120 min | ppla+p(vagotomy vs RIPC)                        | TTC   | ↓ | <0.05  | 0.98     |
| [325] | rat    | 30 min / 120 min | pSPLX vs pRIPC                                  | TTC   | ↓ | <0.001 | 0.95     |
| [325] | rat    | 30 min / 120 min | pRIPC vs pRIPC+vagotomy                         | TTC   | ↑ | <0.05  | 1.00     |
| [325] | rat    | 30 min / 120 min | pRIPC vs p(RIPC+SPLX)                           | TTC   | ↑ | <0.05  | 0.83     |
| [325] | rat    | 30 min / 120 min | pRIPC vs p(splenic denervation)                 | TTC   | ↑ | <0.001 | 0.98     |
| [325] | rat    | 30 min / 120 min | saline vs carbachol                             | TTC   | ↓ | <0.05  | 1.00     |
| [325] | rat    | 30 min / 120 min | TC vs saline                                    | TTC   | ↑ | <0.05  | 1.00     |
| [325] | rat    | 30 min / 120 min | TC vs 1pM carbachol                             | TTC   | ↑ | <0.05  | 1.00     |
| [325] | rat    | 30 min / 120 min | TC vs 10pM carbachol                            | TTC   | ↑ | <0.05  | 1.00     |
| [325] | rat    | 30 min / 120 min | TC vs 20pM carbachol                            | TTC   | ↑ | <0.05  | 1.00     |
| [325] | rat    | 30 min / 120 min | TC vs 100pM carbachol                           | TTC   | ↑ | <0.05  | 1.00     |
| [325] | rat    | 30 min / 120 min | TC vs 1000pM carbachol                          | TTC   | ↑ | <0.05  | 1.00     |
| [325] | rat    | 30 min / 120 min | TC vs 10000pM carbachol                         | TTC   | ↑ | <0.05  | 1.00     |
| [325] | rat    | 30 min / 120 min | saline vs 100pM carbachol                       | TTC   | ↓ | <0.05  | 1.00     |
| [325] | rat    | 30 min / 120 min | saline vs 1000pM carbachol                      | TTC   | ↓ | <0.05  | 1.00     |
| [325] | rat    | 30 min / 120 min | saline vs 10000pM carbachol                     | TTC   | ↓ | <0.05  | 1.00     |
| [325] | rat    | 30 min / 120 min | 1pM carbachol vs 100pM carbachol                | TTC   | ↓ | <0.05  | 1.00     |
| [325] | rat    | 30 min / 120 min | 1pM carbachol vs 100pM carbachol                | TTC   | ↓ | <0.05  | 1.00     |
| [325] | rat    | 30 min / 120 min | 1pM carbachol vs 100pM carbachol                | TTC   | ↓ | <0.05  | 1.00     |
| [325] | rat    | 30 min / 120 min | 10pM carbachol vs 100pM carbachol               | TTC   | ↓ | <0.05  | 0.99     |
| [325] | rat    | 30 min / 120 min | 10pM carbachol vs 1000pM carbachol              | TTC   | ↓ | <0.05  | 0.98     |
| [325] | rat    | 30 min / 120 min | 10pM carbachol vs 10000pM carbachol             | TTC   | ↓ | <0.05  | 1.00     |
| [325] | rat    | 30 min / 120 min | 20pM carbachol vs 100pM carbachol               | TTC   | ↓ | <0.05  | 1.00     |
| [325] | rat    | 30 min / 120 min | 20pM carbachol vs 1000pM carbachol              | TTC   | ↓ | <0.05  | 0.99     |
| [325] | rat    | 30 min / 120 min | 20pM carbachol vs 10000pM carbachol             | TTC   | ↓ | <0.05  | 1.00     |
| [326] | mouse  | perm / 28 d      | WT vs OSTN (osteocrin) OE                       | Histo | ↓ | <0.05  | 0.70     |
| [327] | mouse  | 60 min / 24 h    | WT vs myonectin KO                              | TTC   | ↑ | <0.01  | 0.95     |
| [327] | mouse  | 60 min / 24 h    | WT sedentary vs WT exercise                     | TTC   | ↓ | <0.05  | 0.99     |
| [327] | mouse  | 60 min / 24 h    | myonectin KO sedentary vs myonectin KO exercise | TTC   | → | n.s.   | 0.30     |
| [327] | mouse  | 60 min / 24 h    | WT vs myonectin OE                              | TTC   | ↓ | <0.01  | 0.89     |
| [328] | pig    | 60 min / 1 wk    | con vs metformin                                | TTC   | → | n.s.   | 0.18     |
| [329] | mouse  | perm / 28 d      | con vs Exo                                      | Histo | ↓ | <0.05  | 0.86     |
| [329] | mouse  | perm / 28 d      | Exo-scramble vs Exo anti miR125b                | Histo | ↑ | <0.05  | 0.54     |
| [330] | mouse  | perm / 28 d      | WT vs E2F1                                      | Histo | ↓ | <0.01  | 0.94 (2) |
| [331] | rabbit | 30 min / 2 wk    | veh vs Muse                                     | Histo | ↓ | <0.001 | 1.00 (2) |
| [331] | rabbit | 30 min / 2 wk    | veh vs non-Muse                                 | Histo | ↓ | <0.001 | 0.90 (2) |
| [331] | rabbit | 30 min / 2 wk    | veh vs MSC                                      | Histo | ↓ | <0.001 | 0.95 (2) |
| [331] | rabbit | 30 min / 2 wk    | Muse vs non-Muse                                | Histo | ↑ | <0.001 | 0.91 (2) |
| [331] | rabbit | 30 min / 2 wk    | Muse vs MSC                                     | Histo | ↑ | <0.001 | 0.78 (2) |
| [331] | rabbit | 30 min / 2 mo    | veh vs Muse                                     | Histo | ↓ | <0.001 | 1.00 (2) |
| [331] | rabbit | 30 min / 2 mo    | veh vs non-Muse                                 | Histo | ↓ | <0.05  | 0.41 (2) |
| [331] | rabbit | 30 min / 2 mo    | veh vs MSC                                      | Histo | ↓ | <0.05  | 0.65 (2) |
| [331] | rabbit | 30 min / 2 mo    | Muse vs non-Muse                                | Histo | ↑ | <0.001 | 1.00 (2) |
| [331] | rabbit | 30 min / 2 mo    | Muse vs MSC                                     | Histo | ↑ | <0.01  | 1.00 (2) |
| [332] | mouse  | perm / 28 d      | PBS vs CCND2 OE                                 | Histo | ↓ | <0.05  | 0.71     |
| [333] | mouse  | perm / 8 wk      | ctrl vs transient introduction of miR-294       | Histo | ↓ | <0.01  | 0.99     |
| [334] | rat    | 30 min / 24 h    | veh vs Exercise-Exo                             | TTC   | ↓ | <0.01  | 0.99     |
| [334] | rat    | 30 min / 24 h    | veh vs sedentary-Exo                            | TTC   | → | n.s.   | 0.12     |
| [334] | rat    | 30 min / 24 h    | sedentary - neg con vs exercise neg con         | TTC   | ↓ | <0.01  | 1.00     |
| [334] | rat    | 30 min / 24 h    | exercise neg con vs exercise anti-342           | TTC   | ↓ | <0.05  | 0.92     |
| [334] | rat    | 30 min / 24 h    | agomiR neg cog vs mir-342 agomiR                | TTC   | ↓ | <0.05  | 1.00     |
| [335] | mouse  | perm / 14 d      | WT vs anti-IL35                                 | Histo | → | n.s.   | 0.11     |
| [336] | mouse  | perm / 28 d      | WT vs sulf1 -/-                                 | Histo | ↑ | <0.05  | 0.77     |
| [336] | mouse  | perm / 28 d      | WT vs sulf2 -/-                                 | Histo | ↑ | <0.05  | 0.85     |
| [336] | mouse  | perm / 28 d      | con vs surfen                                   | Histo | ↑ | <0.001 | 1.00     |
| [337] | mouse  | 60 min / 3 wk    | con vs HAS2 KO                                  | Histo | ↑ | <0.05  | 0.68 (2) |
| [337] | mouse  | 25 min / 60 d    | con vs HAS2 KO                                  | Histo | → | n.s.   | 0.06 (2) |
| [338] | mouse  | perm / 15-21 d   | Adm +/- vs ADM hi/hi (male)                     | Histo | → | n.s.   | 0.20     |
| [338] | mouse  | perm / 15-21 d   | Adm +/- vs ADM hi/hi (female)                   | Histo | → | n.s.   | 0.30     |
| [339] | rat    | 30 min / 35 d    | veh vs CD45-Lin-                                | Histo | → | n.s.   | 0.44     |
| [340] | mouse  | 30 min / 24 h    | AD vector vs LAPTM4B -/-                        | TTC   | ↓ | 0.0023 | 0.96     |

|       |        |                  |                                                  |       |   |             |      |   |
|-------|--------|------------------|--------------------------------------------------|-------|---|-------------|------|---|
| [340] | mouse  | 30 min / 24 h    | WT vs LAPTM4B -/-                                | TTC   | ↑ | 0.000000085 | 1.00 |   |
| [340] | mouse  | 30 min / 24 h    | con vs LABTM4B OE                                | TTC   | ↓ | 0.000018    | 1.00 |   |
| [340] | mouse  | 30 min / 24 h    | LABTM4B OE vs BAF+LABTM4B OE                     | TTC   | ↑ | 0.0015      | 0.92 |   |
| [340] | mouse  | 30 min / 24 h    | WT vs LABTM4B -/-                                | TTC   | ↑ | 0.0022      | 0.96 |   |
| [340] | mouse  | 30 min / 24 h    | WT vs WT RAPA                                    | TTC   | ↓ | 0.0277      | 0.93 |   |
| [340] | mouse  | 30 min / 24 h    | LABTM4B -/- vs LABTM4B -/- +rapamycin            | TTC   | ↓ | 0.0001      | 1.00 |   |
| [340] | mouse  | 30 min / 24 h    | WT vs LABTM4B -/-                                | TTC   | ↑ | 0.000000085 | 0.99 |   |
| [340] | mouse  | 30 min / 24 h    | WT vs WT siRaptor                                | TTC   | ↓ | 0.003       | 0.97 |   |
| [340] | mouse  | 30 min / 24 h    | LABTM4B -/- vs LABTM4B -/- +siRaptor             | TTC   | ↓ | 0.00000051  | 1.00 |   |
| [340] | mouse  | 30 min / 24 h    | vector WT vs LABTM4B -/-                         | TTC   | ↑ | 0.0005      | 0.97 |   |
| [340] | mouse  | 30 min / 24 h    | vector WT vs WT TFEBr OE                         | TTC   | ↓ | 0.000024    | 1.00 |   |
| [340] | mouse  | 30 min / 24 h    | vector LABTM4B -/- vs LABTM4B -/- TFEBr OE       | TTC   | ↓ | 0.000026    | 1.00 |   |
| [341] | mouse  | perm / 21 d      | con vs ABR-238901                                | Histo | ↑ | <0.05       | 0.79 |   |
| [342] | mouse  | perm / 8 wk      | veh vs ADSC-Ncad                                 | Histo | ↓ | 0.0024      | 1.00 |   |
| [342] | mouse  | perm / 8 wk      | ADSC-con vs ADSC-Ncad                            | Histo | ↓ | 0.0305      | 1.00 |   |
| [342] | mouse  | perm / 8 wk      | ADSC-con vs ADSC-WT-Ncad                         | Histo | ↓ | 0.0005      | 1.00 |   |
| [342] | mouse  | perm / 8 wk      | ADSC-WT-Ncad vs ADSC-KD-Ncad                     | Histo | ↑ | 0.0334      | 0.81 |   |
| [343] | mouse  | perm / 30 d      | PBS vs WT-EPC-Exo                                | Histo | ↓ | 0.0046      | 0.48 |   |
| [343] | mouse  | perm / 30 d      | WT-EPC-Exo vs IL10 KO EPC-Exo                    | Histo | ↑ | 0.0005      | 0.48 |   |
| [343] | mouse  | perm / 30 d      | PBS vs WT-EPC-Exo                                | Histo | ↓ | <0.0001     | 0.50 |   |
| [343] | mouse  | perm / 30 d      | PBS vs ILK-KD-EPC-Exo                            | Histo | ↓ | <0.0001     | 0.43 |   |
| [343] | mouse  | perm / 30 d      | IL10 KO EPC-Exo vs wt-EPC-Exo                    | Histo | ↓ | <0.0001     | 0.36 |   |
| [343] | mouse  | perm / 30 d      | IL10 KO EPC-Exo vs ILK-KD-EPC-Exo                | Histo | ↓ | <0.001      | 0.30 |   |
| [344] | mouse  | perm / 28 d      | saline vs SNC pre                                | Histo | ↓ | <0.05       | 0.88 |   |
| [344] | mouse  | perm / 28 d      | saline vs SNC interv                             | Histo | ↓ | <0.05       | 1.00 |   |
| [344] | mouse  | perm / 28 d      | SNC interv vs SNC pre                            | Histo | ↑ | <0.05       | 0.99 |   |
| [345] | mouse  | 90 min / 24 h    | con vs flia inh                                  | TTC   | ↓ | <0.01       | 0.99 |   |
| [345] | mouse  | 90 min / 24 h    | con vs fXa inh                                   | TTC   | ↓ | <0.01       | 1.00 |   |
| [345] | mouse  | 90 min / 24 h    | con vs flia inh                                  | TTC   | ↓ | <0.05       | 1.00 |   |
| [345] | mouse  | 90 min / 24 h    | con vs flia inh+3K3A-aPC                         | TTC   | ↓ | <0.01       | 1.00 |   |
| [345] | mouse  | 90 min / 24 h    | flia inh vs flia inh+3K3A-aPC                    | TTC   | ↓ | <0.01       | 1.00 |   |
| [345] | mouse  | 90 min / 24 h    | con vs fXa inh                                   | TTC   | ↓ | <0.01       | 1.00 |   |
| [345] | mouse  | 90 min / 24 h    | con vs fXa inh+MAPC1591                          | TTC   | ↓ | <0.05       | 0.98 |   |
| [345] | mouse  | 90 min / 24 h    | fXa inh vs fXa inh+MPC1609                       | TTC   | ↑ | <0.01       | 1.00 |   |
| [345] | mouse  | 90 min / 24 h    | fXa inh+MPC1609 vs fXa inh+MAPC1591              | TTC   | ↓ | <0.05       | 1.00 |   |
| [346] | mouse  | 30 min / 4-7 wk  | WT vs miR30d OE                                  | TTC   | ↓ | 0.0016      | 0.97 |   |
| [347] | mouse  | perm / 28 d      | Mst1/2 fl/fl vs LysMCre-Mst1/2 fl/fl             | Histo | ↑ | 0.013       | 0.92 |   |
| [347] | mouse  | perm / 28 d      | LysMCre-Mst1/2 fl/fl vs LysMCre-Mst1/2 fl/fl+CP  | Histo | ↓ | 0.013       | 0.99 |   |
| [347] | mouse  | perm / 28 d      | veh vs XMU                                       | Histo | ↑ | 0.0025      | 0.96 |   |
| [347] | mouse  | perm / 28 d      | XMU vs XMU+CP                                    | Histo | ↓ | 0.00000081  | 1.00 |   |
| [347] | mouse  | perm / 28 d      | veh vs xmu+CP                                    | Histo | ↓ | 0.0067      | 0.98 |   |
| [347] | mouse  | perm / 28 d      | CP vs XMU+CP                                     | Histo | ↓ | 0.043       | 0.95 |   |
| [348] | mouse  | perm / 28 d      | con vs MSC-Exo                                   | Histo | ↓ | 0.002       | 1.00 |   |
| [349] | mouse  | 30 min / 24 h    | WT vs GSDMD KO                                   | TTC   | ↓ | 0.000077    | 0.41 |   |
| [349] | mouse  | 30 min / 24 h    | Myh6-cre vs GHDMD KO                             | TTC   | ↓ | 0.000049    | 0.52 |   |
| [349] | mouse  | 30 min / 24 h    | GHDMD f/f vs GHDMD KO                            | TTC   | ↓ | 0.00015     | 0.46 |   |
| [350] | mouse  | 30 min / 24 h    | veh vs MNF                                       | TTC   | ↓ | 0.0025      | 0.83 |   |
| [351] | mouse  | 45 min / 24 h    | veh vs TAT scratch                               | TTC   | → | n.s.        | 0.28 |   |
| [351] | mouse  | 45 min / 24 h    | veh vs TAT-Beclin                                | TTC   | ↓ | 0.0486      | 0.90 |   |
| [351] | mouse  | 45 min / 24 h    | TAT scratch vs TAT-Beclin                        | TTC   | ↓ | 0.0011      | 0.96 |   |
| [352] | mouse  | perm / 28 d      | WT vs cilp1 KO                                   | Histo | ↓ | <0.05       | 0.61 | ② |
| [352] | mouse  | perm / 28 d      | WT vs cilp1 OE                                   | Histo | ↑ | <0.05       | 0.86 | ② |
| [353] | mouse  | 30 min / 120 min | L2HGDH +/- vs L2HDGH +/-                         | TTC   | ↓ | <0.05       | 0.56 | ① |
| [353] | mouse  | 30 min / 120 min | L2HGDH +/- vs L2HDGH -/-                         | TTC   | ↓ | <0.001      | 1.00 | ① |
| [353] | mouse  | 30 min / 60 min  | L2HGDH +/- vs L2HDGH +/-                         | TTC   | ↓ | <0.001      | 0.83 | ① |
| [353] | mouse  | 30 min / 60 min  | L2HGDH +/- vs L2HDGH -/-                         | TTC   | ↓ | <0.001      | 1.00 | ① |
| [353] | mouse  | 30 min / 60 min  | L2HGDH +/- vs L2HDGH -/-                         | TTC   | ↓ | <0.001      | 1.00 | ① |
| [353] | mouse  | 30 min / 60 min  | L2HGDH +/- vs L2HDGH +/-                         | TTC   | ↓ | <0.01       | 1.00 | ① |
| [353] | mouse  | 30 min / 60 min  | L2HGDH +/- vs L2HDGH -/-                         | TTC   | ↓ | <0.05       | 1.00 | ① |
| [354] | mouse  | 30 min / 24 h    | HSA vs rh mg53-WT (male db/db 8 wk)              | TTC   | ↓ | 0.0057      | 0.60 |   |
| [354] | mouse  | 30 min / 24 h    | HSA vs rh mg53-S255A (male db/db 8 wk)           | TTC   | ↓ | 0.0032      | 0.95 |   |
| [354] | mouse  | 30 min / 24 h    | rh mg53-WT vs rh mg53-S255A (male db/db 8 wk)    | TTC   | ↓ | 0.000012    | 0.68 |   |
| [354] | mouse  | 30 min / 24 h    | HSA vs rh mg53-WT (male db/db 12 wk)             | TTC   | → | n.s.        | 0.06 |   |
| [354] | mouse  | 30 min / 24 h    | HSA vs rh mg53-S255A (male db/db 12 wk)          | TTC   | ↓ | 0.00023     | 0.97 |   |
| [354] | mouse  | 30 min / 24 h    | rh mg53-WT vs rh mg53-S255A (male db/db 12 wk)   | TTC   | ↓ | 0.0014      | 0.80 |   |
| [354] | mouse  | 30 min / 24 h    | HSA vs rh mg53-WT (female db/db 12 wk)           | TTC   | → | n.s.        | 0.06 |   |
| [354] | mouse  | 30 min / 24 h    | HSA vs rh mg53-S255A (female db/db 12 wk)        | TTC   | ↓ | 0.023       | 0.70 |   |
| [354] | mouse  | 30 min / 24 h    | rh mg53-WT vs rh mg53-S255A (female db/db 12 wk) | TTC   | ↓ | 0.00076     | 0.82 |   |
| [354] | mouse  | 30 min / 24 h    | HSA vs rh mg53-WT ( mg53 KO)                     | TTC   | ↓ | 0.0091      | 0.64 |   |
| [354] | mouse  | 30 min / 24 h    | HSA vs rh mg53-S255A ( mg53 KO)                  | TTC   | ↓ | 0.00047     | 1.00 |   |
| [354] | mouse  | 30 min / 24 h    | rh mg53-WT vs rh mg53-S255A ( mg53 KO)           | TTC   | → | n.s.        | 0.10 |   |
| [355] | mouse  | perm / 1 wk      | WT vs Arrdc4 KO                                  | TTC   | ↓ | 0.00024     | 0.54 |   |
| [356] | monkey | perm / 30 d      | nc vs LV-MnmFMO2                                 | MRI   | ↓ | 0.032       | 0.91 |   |
| [356] | rat    | perm / 30 d      | nc vs LV-MnmFMO2                                 | Histo | ↓ | 0.019       | 0.91 |   |
| [357] | mouse  | perm / 8 wk      | WT vs LAPR2 KO                                   | Histo | ↑ | 0.0014      | 0.87 |   |
| [357] | mouse  | perm / 23 d      | WT vs LAPR2 KO                                   | Histo | ↑ | 0.00076     | 0.99 |   |
| [357] | mouse  | perm / 3 d       | WT vs LAPR2 KO                                   | TTC   | ↑ | <0.001      | 1.00 |   |
| [358] | mouse  | 30 min / 120 min | con vs DSM isch                                  | TTC   | → | n.s.        | 0.09 |   |
| [358] | mouse  | 30 min / 120 min | con vs DSM rep                                   | TTC   | ↓ | 0.0035      | 1.00 |   |
| [358] | mouse  | 30 min / 120 min | veh vs CsA                                       | TTC   | ↓ | 0.0379      | 1.00 |   |
| [358] | mouse  | 30 min / 120 min | veh vs DSM                                       | TTC   | ↓ | 0.0132      | 1.00 |   |
| [358] | mouse  | 30 min / 120 min | veh vs CsA+DSM                                   | TTC   | ↓ | 0.000143    | 1.00 |   |
| [359] | mouse  | 30 min / 24 h    | WT vs het PDE4B                                  | TTC   | → | n.s.        | 0.11 |   |
| [359] | mouse  | 30 min / 24 h    | WT vs PDB4E KO                                   | TTC   | ↓ | 0.029       | 0.88 |   |
| [359] | mouse  | 30 min / 24 h    | rcp WT / don WT vs rcp WT / don KO               | TTC   | ↓ | 0.033       | 0.72 |   |
| [359] | mouse  | 30 min / 24 h    | rcp WT / don WT vs rcp KO / don KO               | TTC   | ↓ | 0.00000011  | 1.00 |   |
| [359] | mouse  | 30 min / 24 h    | rcp KO / don WT vs rcp KO / don KO               | TTC   | ↓ | 0.0013      | 0.87 |   |
| [359] | mouse  | 30 min / 24 h    | rcp WT / don KO vs rcp KO / don KO               | TTC   | ↓ | 0.024       | 0.80 |   |

|       |       |                  |                                              |       |   |               |      |   |
|-------|-------|------------------|----------------------------------------------|-------|---|---------------|------|---|
| [359] | mouse | 30 min / 24 h    | veh vs PICL 5 mg/kg                          | TTC   | ↓ | 0.00074       | 0.71 |   |
| [359] | mouse | 30 min / 24 h    | veh vs PICL 10 mg/kg                         | TTC   | ↓ | 0.034         | 0.94 |   |
| [360] | mouse | 45 min / 24 h    | WT vs CIRCIL OE                              | TTC   | ↑ | 0.0000085     | 1.00 |   |
| [360] | mouse | 45 min / 24 h    | WT vs CIRCIL KO                              | TTC   | ↓ | 0.0000013     | 0.98 |   |
| [360] | mouse | 45 min / 24 h    | WT vs CIRCIL OE                              | TTC   | ↑ | 0.0000051     | 1.00 |   |
| [360] | mouse | 45 min / 24 h    | CIRCIL OE+KU70 vs CIRCIL OE+vector           | TTC   | ↑ | 0.0000049     | 1.00 |   |
| [361] | mouse | 60 min / 2 wk    | con vs harmine                               | TTC   | → | n.s.          | 0.18 | ① |
| [361] | mouse | 60 min / 2 wk    | con vs DYRK1a KO                             | TTC   | → | n.s.          | 0.21 | ① |
| [362] | mouse | 40 min / 24 h    | sedentary vs exercise                        | TTC   | ↓ | 0.0012        | 1.00 |   |
| [362] | mouse | 40 min / 24 h    | exercise vs exercise+BAT ablation            | TTC   | ↑ | 0.014         | 0.99 |   |
| [362] | mouse | 40 min / 24 h    | shRab27a#2+exercise sham vs shRab27a#2       | TTC   | ↓ | 0.0000057     | 1.00 |   |
| [362] | mouse | 40 min / 24 h    | shRab27a#2 sedentary vs scramble exercise    | TTC   | ↑ | 0.028         | 0.96 |   |
| [362] | mouse | 40 min / 24 h    | shRab27a#2 sedentary vs shRab26a#3 sedentary | TTC   | ↑ | 0.018         | 0.95 |   |
| [362] | mouse | 40 min / 24 h    | veh vs BATsEVs                               | TTC   | ↓ | 0.00000000097 | 1.00 |   |
| [362] | mouse | 40 min / 24 h    | sedentary NC vs exercise NC                  | TTC   | ↓ | 0.00019       | 1.00 |   |
| [362] | mouse | 40 min / 24 h    | exercise NC vs exercise antagoniRs           | TTC   | ↑ | 0.0013        | 1.00 |   |
| [363] | mouse | 30 min / 120 min | con vs LM22A-4                               | TTC   | ↓ | 0.0008        | 1.00 |   |
| [363] | mouse | 30 min / 120 min | con vs LM22A-4 (myoBDNF KO)                  | TTC   | ↓ | 0.0012        | 1.00 |   |
| [363] | mouse | 30 min / 120 min | WT vs myoBDNF KO                             | TTC   | ↑ | 0.0024        | 1.00 |   |
| [363] | mouse | 30 min / 120 min | LM22A-4 WT vs LM22A-4 myoBDNF KO             | TTC   | ↑ | 0.0012        | 1.00 |   |
| [363] | mouse | 30 min / 120 min | con vs BRL37344 (WT)                         | TTC   | ↓ | 0.02          | 1.00 |   |
| [363] | mouse | 30 min / 120 min | WT vs myoBDNF KO                             | TTC   | ↑ | 0.003         | 1.00 |   |
| [363] | mouse | 30 min / 120 min | WT vs BRL37344+myoBDNF KO                    | TTC   | ↑ | 0.0024        | 1.00 |   |
| [363] | mouse | 30 min / 120 min | BRL37344 WT vs BRL37344+myoBDNF KO           | TTC   | ↑ | 0.0012        | 1.00 |   |
| [364] | mouse | perm / 28 d      | WT vs ZBP1 KO                                | Histo | → | n.s.          | 0.07 |   |
| [365] | rat   | perm / 28 d      | PBS vs tropoelastin                          | Histo | ↓ | 0.0001        | 1.00 | ② |
| [366] | rat   | 30 min / 120 min | PBS vs GSH 10mM                              | TTC   | ↓ | 0.0004        | 0.98 |   |
| [366] | rat   | 30 min / 120 min | PBS vs GSSG 10mM                             | TTC   | ↓ | 0.00051       | 1.00 |   |
| [366] | rat   | 30 min / 120 min | PBS vs Fer-1                                 | TTC   | ↓ | 0.000024      | 0.99 |   |
| [366] | rat   | 30 min / 120 min | PBS vs delayed Fer-1                         | TTC   | ↓ | 0.023         | 0.42 |   |
| [366] | rat   | 30 min / 120 min | Fer1 vs delayed Fer-1                        | TTC   | ↑ | 0.00052       | 0.72 |   |
| [366] | rat   | 30 min / 120 min | PBS vs MK571                                 | TTC   | ↓ | 0.0036        | 0.79 |   |
| [366] | rat   | 30 min / 120 min | PBS vs delayed MK571                         | TTC   | ↓ | 0.041         | 0.42 |   |
| [366] | rat   | 30 min / 120 min | PBS vs MK571+Fer-1                           | TTC   | ↓ | 0.035         | 0.77 |   |
| [366] | rat   | 30 min / 120 min | MK571 vs delayed MK571                       | TTC   | ↑ | 0.013         | 0.57 |   |
| [367] | mouse | 45 min / 24 h    | WT vs ucp1 -/-                               | TTC   | ↑ | 0.03          | 0.73 |   |
| [367] | mouse | 45 min / 24 h    | WT vs BAT                                    | TTC   | ↓ | 0.04          | 0.69 |   |
| [367] | mouse | 45 min / 24 h    | sham vs WT BAT (Bmp3-/-)                     | TTC   | ↑ | 0.005         | 0.94 |   |
| [367] | mouse | 45 min / 24 h    | WT BAT (Bmp3-/-) vs BMP3-/- BAT (Bmp3-/-)    | TTC   | ↓ | 0.00001       | 1.00 |   |
| [368] | mouse | 30 min / 1 wk    | lox vs Pf4D                                  | TTC   | ↑ | 0.0017        | 0.97 | ② |
| [368] | mouse | 30 min / 1 wk    | Pf4D con vs Pf4D ticagrelor                  | TTC   | ↓ | 0.0244        | 1.00 | ② |
| [368] | mouse | 30 min / 4 wk    | lox vs Pf4D                                  | TTC   | ↓ | 0.0082        | 1.00 | ② |
| [369] | pig   | 60 min / 28 d    | veh vs nGFP-CM SMRTs                         | MRI   | ↓ | 0.00194       | 1.00 |   |
| [369] | pig   | 60 min / 28 d    | veh vs CCND2-CM SMRTs                        | MRI   | ↓ | 0.00477       | 1.00 |   |
| [369] | mouse | perm min / 28d   | veh vs L7Ae-modRNA                           | Histo | ↓ | 0.0474        | 1.00 |   |
| [369] | mouse | perm min / 28d   | veh vs CCND2-CM SMRTs                        | Histo | ↓ | 0.0000355     | 1.00 |   |
| [369] | mouse | perm min / 28d   | L7Ae-modRNA vs LUC-CM SMRTs                  | Histo | ↓ | 0.00256       | 1.00 |   |
| [369] | mouse | perm min / 28d   | LUC-CM SMRTs vs CCND2-CM SMRTS               | Histo | ↓ | 0.00144       | 1.00 |   |
| [370] | mouse | perm / 7 d       | FAP+/- vs FAP-/-                             | Histo | ↓ | 0.043         | 0.94 | ② |
| [370] | mouse | perm / 7 d       | veh vs FAPi (Nppb +/-)                       | Histo | ↓ | 0.013         | 1.00 | ② |
| [370] | mouse | perm / 7 d       | veh vs FAPi (Npr1 +/-)                       | Histo | → | n.s.          | 0.89 | ② |
| [370] | mouse | perm / 7 d       | FAPi vs FAPi+Nppb +/-                        | Histo | ↑ | 0.0046        | 0.95 | ② |
| [370] | mouse | perm / 7 d       | FAPi vs FAPi Npr1 +/-                        | Histo | ↑ | 0.00000058    | 1.00 | ② |
| [371] | mouse | 45 min / 24 h    | WT vs ASPP1 OE                               | TTC   | ↑ | 0.0000052     | 1.00 |   |
| [371] | mouse | 45 min / 24 h    | WT vs ASPP1 KO                               | TTC   | ↓ | 0.00000013    | 1.00 |   |
| [371] | mouse | 45 min / 24 h    | ASPP1 OE+AAV9-NC vs AAV9-shp53               | TTC   | ↓ | 0.000000033   | 1.00 |   |

- ↑ increased infarct size                      \* no n-values reported  
 ↓ decreased infarct size                      gray shaded: studies without prospective power analysis and using the most reasonable infarct size endpoint  
 → infarct size not changed                      red shaded: studies with a prospective power analysis and using the most reasonable infarct size endpoint  
 ① endpoint for prospective power calculation other than infarct size  
 ② endpoint for prospective power calculation not specified

## Supplemental references

1. Belaidi, E; Decorps, J; Augeul, L; Durand, A; Ovize, M (2013) Endoplasmic reticulum stress contributes to heart protection induced by cyclophilin D inhibition. *Basic Res Cardiol* 108:363. doi:10.1007/s00395-013-0363-z
2. Bell, RM; Kunuthur, SP; Hendry, C; Bruce-Hickman, D; Davidson, S; Yellon, DM (2013) Matrix metalloproteinase inhibition protects CyPD knockout mice independently of RISK/mPTP signalling: a parallel pathway to protection. *Basic Res Cardiol* 108:331. doi:10.1007/s00395-013-0331-7
3. Contractor, H; Stottrup, NB; Cunnington, C; Manhiot, C; Diesch, J; Ormerod, JOM; Jensen, R; Botker, HE; Redington, A; Schmidt, MR; Ashrafian, H; Kharbanda, RK (2013) Aldehyde dehydrogenase-2 inhibition blocks remote preconditioning in experimental and human models. *Basic Res Cardiol* 108:343. doi:10.1007/s00395-013-0343-3
4. Davidson, SM; Selvaraj, P; He, D; Boi-Doku, C; Yellon, RL; Vicencio, JM; Yellon, DM (2013) Remote ischaemic preconditioning involves signalling through the SDF-1 alpha/CXCR4 signalling axis. *Basic Res Cardiol* 108:377. doi:10.1007/s00395-013-0377-6
5. De Paulis, D; Chiari, P; Teixeira, G; Couture-Lepetit, E; Abrial, M; Argaud, L; Gharib, A; Ovize, M (2013) Cyclosporine A at reperfusion fails to reduce infarct size in the in vivo rat heart. *Basic Res Cardiol* 108:379. doi:10.1007/s00395-013-0379-4
6. Farah, C; Kleindienst, A; Bolea, G; Meyer, G; Gayrard, S; Geny, B; Obert, P; Cazorla, O; Tanguy, S; Reboul, C (2013) Exercise-induced cardioprotection: a role for eNOS uncoupling and NO metabolites. *Basic Res Cardiol* 108:389. doi:10.1007/s00395-013-0389-2
7. Gross, ER; Hsu, AK; Urban, TJ; Mochly-Rosen, D; Gross, GJ (2013) Nociceptive-induced myocardial remote conditioning is mediated by neuronal gamma protein kinase C. *Basic Res Cardiol* 108:381. doi:10.1007/s00395-013-0381-x
8. Lei, P; Baysa, A; Nebb, HI; Valen, G; Skomedal, T; Osnes, JB; Yang, ZQ; Haugen, F (2013) Activation of Liver X receptors in the heart leads to accumulation of intracellular lipids and attenuation of ischemia-reperfusion injury. *Basic Res Cardiol* 108:323. doi:10.1007/s00395-012-0323-z
9. Luo, T; Chen, BH; Zhao, ZL; He, NQ; Zeng, Z; Wu, B; Fukushima, Y; Dai, M; Huang, QB; Xu, DL; Bin, JP; Kitakaze, M; Liao, YL (2013) Histamine H2 receptor activation exacerbates myocardial ischemia/reperfusion injury by disturbing mitochondrial and endothelial function. *Basic Res Cardiol* 108:342. doi:10.1007/s00395-013-0342-4
10. Markowski, P; Boehm, O; Goelz, L; Haesner, AL; Ehrentraut, H; Bauerfeld, K; Tran, N; Zacharowski, K; Weisheit, C; Langhoff, P; Schwederski, M; Hilbert, T; Klaschik, S; Hoefft, A; Baumgarten, G; Meyer, R; Knuefermann, P (2013) Pre-conditioning with synthetic CpG-oligonucleotides attenuates myocardial ischemia/reperfusion injury via IL-10 up-regulation. *Basic Res Cardiol* 108:376. doi:10.1007/s00395-013-0376-7
11. Methner, C; Lukowski, R; Grube, K; Loga, F; Smith, RAJ; Murphy, MP; Hofmann, F; Krieg, T (2013) Protection through postconditioning or a mitochondria-targeted S-nitrosothiol is unaffected by cardiomyocyte-selective ablation of protein kinase G. *Basic Res Cardiol* 108:337. doi:10.1007/s00395-013-0337-1
12. Pei, HF; Yu, QJ; Xue, Q; Guo, YP; Sun, L; Hong, ZB; Han, H; Gao, EH; Qu, Y; Tao, L (2013) Notch1 cardioprotection in myocardial ischemia/reperfusion involves reduction of oxidative/nitrative stress. *Basic Res Cardiol* 108:373. doi:10.1007/s00395-013-0373-x
13. Pei, HF; Qu, Y; Lu, XY; Yu, QJ; Lian, K; Liu, PL; Yan, WJ; Liu, JY; Ma, YZ; Liu, Y; Li, CX; Li, WJ; Lau, WB; Zhang, HF; Tao, L (2013) Cardiac-derived adiponectin induced by long-term insulin treatment ameliorates myocardial ischemia/reperfusion injury in type 1 diabetic mice via AMPK signaling. *Basic Res Cardiol* 108:322. doi:10.1007/s00395-012-0322-0
14. Penna, C; Perrelli, MG; Tullio, F; Angotti, C; Camporeale, A; Poli, V; Pagliaro, P (2013) Diazoxide postconditioning induces mitochondrial protein S-Nitrosylation and a redox-sensitive mitochondrial phosphorylation/translocation of RISK elements: no role for SAFE. *Basic Res Cardiol* 108:371. doi:10.1007/s00395-013-0371-z
15. Sanchez, JA; Rodriguez-Sinovas, A; Barba, I; Miro-Casas, E; Fernandez-Sanz, C; Ruiz-Meana, M; Albuquerque-Bejar, JJ; Garcia-Dorado, D (2013) Activation of RISK and SAFE pathways is not involved in the effects of Cx43 deficiency on tolerance to ischemia-reperfusion injury and preconditioning protection. *Basic Res Cardiol* 108:351. doi:10.1007/s00395-013-0351-3

16. Su, H; Yuan, YX; Wang, XM; Lau, WB; Wang, YJ; Wang, XL; Gao, EH; Koch, WJ; Ma, XL (2013) Inhibition of CTRP9, a novel and cardiac-abundantly expressed cell survival molecule, by TNF alpha-initiated oxidative signaling contributes to exacerbated cardiac injury in diabetic mice. *Basic Res Cardiol* 108:315. doi:10.1007/s00395-012-0315-z
17. Sun, ZC; Tong, G; Ma, N; Li, JY; Li, XJ; Li, S; Zhou, JY; Xiong, LZ; Cao, F; Yao, LB; Wang, HC; Shen, L (2013) NDRG2: a newly identified mediator of insulin cardioprotection against myocardial ischemia-reperfusion injury. *Basic Res Cardiol* 108:341. doi:10.1007/s00395-013-0341-5
18. Wang, N; De Vuyst, E; Ponsaerts, R; Boengler, K; Palacios-Prado, N; Wauman, J; Lai, CP; De Bock, M; Decrock, E; Bol, M; Vinken, M; Rogiers, V; Tavernier, J; Evans, WH; Naus, CC; Bukauskas, FF; Sipido, KR; Heusch, G; Schulz, R; Bultynck, G; Leybaert, L (2013) Selective inhibition of Cx43 hemichannels by Gap19 and its impact on myocardial ischemia/reperfusion injury. *Basic Res Cardiol* 108:309. doi:10.1007/s00395-012-0309-x
19. Zhao, M; He, X; Bi, XY; Yu, XJ; Wier, WG; Zang, WJ (2013) Vagal stimulation triggers peripheral vascular protection through the cholinergic anti-inflammatory pathway in a rat model of myocardial ischemia/reperfusion. *Basic Res Cardiol* 108:345. doi:10.1007/s00395-013-0345-1
20. Garcia-Prieto, J; Garcia-Ruiz, JM; Sanz-Rosa, D; Pun, A; Garcia-Alvarez, A; Davidson, SM; Fernandez-Friera, L; Nuno-Ayala, M; Fernandez-Jimenez, R; Bernal, JA; Izquierdo-Garcia, JL; Jimenez-Borreguero, J; Pizarro, G; Ruiz-Cabello, J; Macaya, C; Fuster, V; Yellon, DM; Ibanez, B (2014) beta(3) adrenergic receptor selective stimulation during ischemia/reperfusion improves cardiac function in translational models through inhibition of mPTP opening in cardiomyocytes. *Basic Res Cardiol* 109:422. doi:10.1007/s00395-014-0422-0
21. Li, J; Rohailla, S; Gelber, N; Rutka, J; Sabah, N; Gladstone, RA; Wei, C; Hu, PZ; Kharbanda, RK; Redington, AN (2014) MicroRNA-144 is a circulating effector of remote ischemic preconditioning. *Basic Res Cardiol* 109:423. doi:10.1007/s00395-014-0423-z
22. Liu, Y; Lian, K; Zhang, LJ; Wang, RT; Yi, F; Gao, C; Xin, C; Zhu, D; Li, Y; Yan, WJ; Xiong, LZ; Gao, EH; Wang, HC; Tao, L (2014) TXNIP mediates NLRP3 inflammasome activation in cardiac microvascular endothelial cells as a novel mechanism in myocardial ischemia/reperfusion injury. *Basic Res Cardiol* 109:415. doi:10.1007/s00395-014-0415-z
23. Lu, MJ; Chen, YS; Huang, HS; Ma, MC (2014) Hypoxic preconditioning protects rat hearts against ischemia-reperfusion injury via the arachidonate12-lipoxygenase/transient receptor potential vanilloid 1 pathway. *Basic Res Cardiol* 109:414. doi:10.1007/s00395-014-0414-0
24. Merlocco, AC; Redington, KL; Disenhouse, T; Strantzas, SC; Gladstone, R; Wei, C; Tropak, MB; Manlihot, C; Li, J; Redington, AN (2014) Transcutaneous electrical nerve stimulation as a novel method of remote preconditioning: in vitro validation in an animal model and first human observations. *Basic Res Cardiol* 109:406. doi:10.1007/s00395-014-0406-0
25. Merx, MW; Gorressen, S; van de Sandt, AM; Cortese-Krott, MM; Ohlig, J; Stern, M; Rassaf, T; Godecke, A; Gladwin, MT; Kelm, M (2014) Depletion of circulating blood NOS3 increases severity of myocardial infarction and left ventricular dysfunction. *Basic Res Cardiol* 109:398. doi:10.1007/s00395-013-0398-1
26. Muller, J; Gorressen, S; Grandoch, M; Feldmann, K; Kretschmer, I; Lehr, S; Ding, Z; Schmitt, JP; Schrader, J; Garbers, C; Heusch, G; Kelm, M; Scheller, J; Fischer, JW (2014) Interleukin-6-dependent phenotypic modulation of cardiac fibroblasts after acute myocardial infarction. *Basic Res Cardiol* 109:440. doi:10.1007/s00395-014-0440-y
27. Penna, C; Brancaccio, M; Tullio, F; Rubinetto, C; Perrelli, MG; Angotti, C; Pagliaro, P; Tarone, G (2014) Overexpression of the muscle-specific protein, melusin, protects from cardiac ischemia/reperfusion injury. *Basic Res Cardiol* 109:418. doi:10.1007/s00395-014-0418-9
28. Sun, LL; Chen, C; Jiang, BB; Li, YL; Deng, QP; Sun, M; An, XB; Yang, X; Yang, Y; Zhang, RL; Lu, Y; Zhu, DS; Huo, YQ; Feng, GS; Zhang, YY; Luo, JC (2014) Grb2-associated binder 1 is essential for cardioprotection against ischemia/reperfusion injury. *Basic Res Cardiol* 109:420. doi:10.1007/s00395-014-0420-2
29. Tseliou, E; Reich, H; de Couto, G; Terrovitis, J; Sun, BM; Liu, WX; Marban, E (2014) Cardiospheres reverse adverse remodeling in chronic rat myocardial infarction: roles of soluble endoglin and Tgf-beta signaling. *Basic Res Cardiol* 109:443. doi:10.1007/s00395-014-0443-8
30. Zhang, Y; Liu, XX; She, ZG; Jiang, DS; Wan, NA; Xia, H; Zhu, XH; Wei, X; Zhang, XD; Li, HL (2014) Interferon regulatory factor 9 is an essential mediator of heart dysfunction and cell death



following myocardial ischemia/reperfusion injury. *Basic Res Cardiol* 109:434. doi:10.1007/s00395-014-0434-9

31. Bao, MW; Cai, ZX; Zhang, XJ; Li, LP; Liu, XX; Wan, N; Hu, GY; Wan, FW; Zhang, R; Zhu, XY; Xia, H; Li, HL (2015) Dickkopf-3 protects against cardiac dysfunction and ventricular remodeling following myocardial infarction. *Basic Res Cardiol* 110:25. doi:10.1007/s00395-015-0481-x

32. Barsukevich, V; Basalay, M; Sanchez, J; Mrochek, A; Whittle, J; Ackland, GL; Gourine, AV; Gourine, A (2015) Distinct cardioprotective mechanisms of immediate, early and delayed ischaemic postconditioning. *Basic Res Cardiol* 110:452. doi:10.1007/s00395-014-0452-7

33. Baysa, A; Sagave, J; Carpi, A; Zaglia, T; Campesan, M; Dahl, CP; Bilbija, D; Troitskaya, M; Gullestad, L; Giorgio, M; Mongillo, M; Di Lisa, F; Vaage, JI; Valen, G (2015) The p66ShcA adaptor protein regulates healing after myocardial infarction. *Basic Res Cardiol* 110:13. doi:10.1007/s00395-015-0470-0

34. Das, A; Samidurai, A; Hoke, NN; Kukreja, RC; Salloum, FN (2015) Hydrogen sulfide mediates the cardioprotective effects of gene therapy with PKG-I alpha. *Basic Res Cardiol* 110:42. doi:10.1007/s00395-015-0500-y

35. Das, A; Salloum, FN; Filippone, SM; Durrant, DE; Rokosh, G; Bolli, R; Kukreja, RC (2015) Inhibition of mammalian target of rapamycin protects against reperfusion injury in diabetic heart through STAT3 signaling. *Basic Res Cardiol* 110:31. doi:10.1007/s00395-015-0486-5

36. Eisenhardt, SU; Weiss, JBW; Smolka, C; Maxeiner, J; Pankratz, F; Bemtgen, X; Kustermann, M; Thiele, JR; Schmidt, Y; Stark, GB; Moser, M; Bode, C; Grundmann, S (2015) MicroRNA-155 aggravates ischemia-reperfusion injury by modulation of inflammatory cell recruitment and the respiratory oxidative burst. *Basic Res Cardiol* 110:32. doi:10.1007/s00395-015-0490-9

37. Hernandez-Resendiz, S; Palma-Flores, C; De los Santos, S; Roman-Anguiano, NG; Flores, M; de la Pena, A; Flores, PL; Fernandez, JM; Coral-Vazquez, RM; Zazueta, C (2015) Reduction of no-reflow and reperfusion injury with the synthetic 17 beta-aminoestrogen compound Prolame is associated with PI3K/Akt/eNOS signaling cascade. *Basic Res Cardiol* 110:1. doi:10.1007/s00395-015-0464-y

38. Li, LP; Wang, XD; Chen, W; Qi, HY; Jiang, DS; Huang, L; Huang, FH; Wang, LM; Li, HL; Chen, X (2015) Regulatory role of CARD3 in left ventricular remodeling and dysfunction after myocardial infarction. *Basic Res Cardiol* 110:56. doi:10.1007/s00395-015-0515-4

39. Niu, JL; Jin, ZQ; Kim, H; Kolattukudy, PE (2015) MCP-1-induced protein attenuates post-infarct cardiac remodeling and dysfunction through mitigating NF-kappa B activation and suppressing inflammation-associated microRNA expression. *Basic Res Cardiol* 110:26. doi:10.1007/s00395-015-0483-8

40. Robinson, E; Cassidy, RS; Tate, M; Zhao, YY; Lockhart, S; Calderwood, D; Church, R; McGahon, MK; Brazil, DP; McDermott, BJ; Green, BD; Grieve, DJ (2015) Exendin-4 protects against post-myocardial infarction remodeling via specific actions on inflammation and the extracellular matrix. *Basic Res Cardiol* 110:20. doi:10.1007/s00395-015-0476-7

41. Szczepanek, K; Xu, AJ; Hu, Y; Thompson, J; He, J; Larner, AC; Salloum, FN; Chen, Q; Lesnefsky, EJ (2015) Cardioprotective function of mitochondrial-targeted and transcriptionally inactive STAT3 against ischemia and reperfusion injury. *Basic Res Cardiol* 110:53. doi:10.1007/s00395-015-0509-2

42. Tian, YK; French, BA; Kron, IL; Yang, ZQ (2015) Splenic leukocytes mediate the hyperglycemic exacerbation of myocardial infarct size in mice. *Basic Res Cardiol* 110:39. doi:10.1007/s00395-015-0496-3

43. Tian, YK; Marshall, M; French, BA; Linden, J; Yang, ZQ (2015) The infarct-sparing effect of IB-MECA against myocardial ischemia/reperfusion injury in mice is mediated by sequential activation of adeNOSine A(3) and A(2A) receptors. *Basic Res Cardiol* 110:16. doi:10.1007/s00395-015-0473-x

44. Uitterdijk, A; Yetgin, T; Hekkert, MTL; Sneep, S; Krabbendam-Peters, I; van Beusekom, HMM; Fischer, TM; Cornelussen, RN; Manintveld, OC; Merkus, D; Duncker, DJ (2015) Vagal nerve stimulation started just prior to reperfusion limits infarct size and no-reflow. *Basic Res Cardiol* 110:51. doi:10.1007/s00395-015-0508-3

45. Yan, L; Kudej, RK; Vatner, DE; Vatner, SF (2015) Myocardial ischemic protection in natural mammalian hibernation. *Basic Res Cardiol* 110:9. doi:10.1007/s00395-015-0462-0

46. Yang, XM; Cui, L; White, J; Kuck, J; Ruchko, MV; Wilson, GL; Alexeyev, M; Gillespie, MN; Downey, JM; Cohen, MV (2015) Mitochondrially targeted Endonuclease III has a powerful anti-infarct

- effect in an in vivo rat model of myocardial ischemia/reperfusion. *Basic Res Cardiol* 110:3. doi:10.1007/s00395-014-0459-0
47. Zalewski, J; Claus, P; Bogaert, J; Vanden Driessche, N; Driesen, RB; Galan, DT; Sipido, KR; Buszman, P; Milewski, K; Van de Werf, F (2015) Cyclosporine A reduces microvascular obstruction and preserves left ventricular function deterioration following myocardial ischemia and reperfusion. *Basic Res Cardiol* 110:18. doi:10.1007/s00395-015-0475-8
48. Borrell-Pages, M; Vilahur, G; Romero, JC; Casani, L; Bejar, MT; Badimon, L (2016) LRP5/canonical Wnt signalling and healing of ischemic myocardium. *Basic Res Cardiol* 111:67. doi:10.1007/s00395-016-0585-y
49. Estrada, JA; Williams, AG; Sun, J; Gonzalez, L; Downey, HF; Caffrey, JL; Mallet, RT (2016) delta-Opioid receptor (DOR) signaling and reactive oxygen species (ROS) mediate intermittent hypoxia induced protection of canine myocardium. *Basic Res Cardiol* 111:17. doi:10.1007/s00395-016-0538-5
50. Fang, J; Hu, FD; Ke, D; Yan, YM; Liao, ZM; Yuan, X; Wu, LZ; Jiang, Q; Chen, LL (2016) N,N-dimethylsphingosine attenuates myocardial ischemia-reperfusion injury by recruiting regulatory T cells through PI3K/Akt pathway in mice. *Basic Res Cardiol* 111:32. doi:10.1007/s00395-016-0548-3
51. Inserte, J; Cardona, M; Poncelas-Nozal, M; Hernando, V; Vilardosa, U; Aluja, D; Parra, VM; Sanchis, D; Garcia-Dorado, D (2016) Studies on the role of apoptosis after transient myocardial ischemia: genetic deletion of the executioner caspases-3 and-7 does not limit infarct size and ventricular remodeling. *Basic Res Cardiol* 111:18. doi:10.1007/s00395-016-0537-6
52. Johnsen, J; Pryds, K; Salman, R; Lofgren, B; Kristiansen, SB; Botker, HE (2016) The remote ischemic preconditioning algorithm: effect of number of cycles, cycle duration and effector organ mass on efficacy of protection. *Basic Res Cardiol* 111:10. doi:10.1007/s00395-016-0529-6
53. Kleindienst, A; Battault, S; Belaidi, E; Tanguy, S; Rosselin, M; Boulghobra, D; Meyer, G; Gayraud, S; Walther, G; Geny, B; Durand, G; Cazorla, O; Reboul, C (2016) Exercise does not activate the beta(3) adrenergic receptor-eNOS pathway, but reduces inducible NOS expression to protect the heart of obese diabetic mice. *Basic Res Cardiol* 111:40. doi:10.1007/s00395-016-0559-0
54. Marchini, T; Wolf, D; Michel, NA; Mauler, M; Dufner, B; Hoppe, N; Beckert, J; Jackel, M; Magnani, N; Duerschmied, D; Tasat, D; Alvarez, S; Reinohl, J; von zur Muhlen, C; Idzko, M; Bode, C; Hilgendorf, I; Evelson, P; Zirlik, A (2016) Acute exposure to air pollution particulate matter aggravates experimental myocardial infarction in mice by potentiating cytokine secretion from lung macrophages. *Basic Res Cardiol* 111:44. doi:10.1007/s00395-016-0562-5
55. Pickard, JMJ; Davidson, SM; Hausenloy, DJ; Yellon, DM (2016) Co-dependence of the neural and humoral pathways in the mechanism of remote ischemic conditioning. *Basic Res Cardiol* 111:50. doi:10.1007/s00395-016-0568-z
56. Reforgiato, MR; Milano, G; Fabrias, G; Casas, J; Gasco, P; Paroni, R; Samaja, M; Ghidoni, R; Caretti, A; Signorelli, P (2016) Inhibition of ceramide de novo synthesis as a postischemic strategy to reduce myocardial reperfusion injury. *Basic Res Cardiol* 111:12. doi:10.1007/s00395-016-0533-x
57. Tian, YK; Pan, DF; Chordia, MD; French, BA; Kron, IL; Yang, ZQ (2016) The spleen contributes importantly to myocardial infarct exacerbation during post-ischemic reperfusion in mice via signaling between cardiac HMGB1 and splenic RAGE. *Basic Res Cardiol* 111:62. doi:10.1007/s00395-016-0583-0
58. Wang, XX; Wang, XL; Tong, MM; Gan, L; Chen, HL; Wu, SS; Chen, JX; Li, RL; Wu, Y; Zhang, HY; Zhu, Y; Li, YX; He, JH; Wang, MJ; Jiang, W (2016) SIRT6 protects cardiomyocytes against ischemia/reperfusion injury by augmenting FoxO3 alpha-dependent antioxidant defense mechanisms. *Basic Res Cardiol* 111:13. doi:10.1007/s00395-016-0531-z
59. Bei, YH; Xu, TZ; Lv, DC; Yu, PJ; Xu, JH; Che, L; Das, A; Tigges, J; Toxavidis, V; Ghiran, I; Shah, R; Li, YQ; Zhang, YH; Das, S; Xiao, JJ (2017) Exercise-induced circulating extracellular vesicles protect against cardiac ischemia-reperfusion injury. *Basic Res Cardiol* 112:38. doi:10.1007/s00395-017-0628-z
60. Blackburn, NJR; Vulesevic, B; McNeill, B; Cimenci, CE; Ahmadi, A; Gonzalez-Gomez, M; Ostojic, A; Zhong, ZY; Brownlee, M; Beisswenger, PJ; Milne, RW; Suuronen, EJ (2017) Methylglyoxal-derived advanced glycation end products contribute to negative cardiac remodeling and dysfunction post-myocardial infarction. *Basic Res Cardiol* 112:57. doi:10.1007/s00395-017-0646-x
61. Du, GQ; Shao, ZB; Wu, J; Yin, WJ; Li, SH; Wu, J; Weisel, RD; Tian, JW; Li, RK (2017) Targeted myocardial delivery of GDF11 gene rejuvenates the aged mouse heart and enhances myocardial

regeneration after ischemia-reperfusion injury. *Basic Res Cardiol* 112:7. doi:10.1007/s00395-016-0593-y

62. Gadicherla, AK; Wang, N; Bulic, M; Agullo-Pascual, E; Lissoni, A; De Smet, M; Delmar, M; Bultynck, G; Krysko, DV; Camara, A; Schluter, KD; Schulz, R; Kwok, WM; Leybaert, L (2017) Mitochondrial Cx43 hemichannels contribute to mitochondrial calcium entry and cell death in the heart. *Basic Res Cardiol* 112:27. doi:10.1007/s00395-017-0618-1
63. Garcia-Nino, WR; Correa, F; Rodriguez-Barrena, JI; Leon-Contreras, JC; Buelna-Chontal, M; Soria-Castro, E; Hernandez-Pando, R; Pedraza-Chaverri, J; Zazueta, C (2017) Cardioprotective kinase signaling to subsarcolemmal and interfibrillar mitochondria is mediated by caveolar structures. *Basic Res Cardiol* 112:15. doi:10.1007/s00395-017-0607-4
64. Garcia-Ruiz, JM; Galan-Arriola, C; Fernandez-Jimenez, R; Agüero, J; Sanchez-Gonzalez, J; Garcia-Alvarez, A; Nuno-Ayala, M; Dube, GP; Zafirelis, Z; Lopez-Martin, GJ; Bernal, JA; Lara-Pezzi, E; Fuster, V; Ibanez, B (2017) Bloodless reperfusion with the oxygen carrier HBOC-201 in acute myocardial infarction: a novel platform for cardioprotective probes delivery. *Basic Res Cardiol* 112:17. doi:10.1007/s00395-017-0605-6
65. Harsseh, R; Pillot, B; Gharib, A; Augeul, L; Gallo-Bona, N; Ferrera, R; Loufouat, J; Delale, T; Allas, S; Aribat, T; Da Silva, CC; Ovize, M (2017) Unacylated ghrelin analog prevents myocardial reperfusion injury independently of permeability transition pore. *Basic Res Cardiol* 112:4. doi:10.1007/s00395-016-0595-9
66. Hong, H; Tao, T; Chen, S; Liang, CQ; Qiu, Y; Zhou, YH; Zhang, R (2017) MicroRNA-143 promotes cardiac ischemia-mediated mitochondrial impairment by the inhibition of protein kinase Cepsilon. *Basic Res Cardiol* 112:60. doi:10.1007/s00395-017-0649-7
67. Hooshdaran, B; Kolpakov, MA; Guo, XJ; Miller, SA; Wang, T; Tilley, DG; Rafiq, K; Sabri, A (2017) Dual inhibition of cathepsin G and chymase reduces myocyte death and improves cardiac remodeling after myocardial ischemia reperfusion injury. *Basic Res Cardiol* 112:62. doi:10.1007/s00395-017-0652-z
68. Jamaiyar, A; Wan, WG; Ohanyan, V; Enrick, M; Janota, D; Cumpston, D; Song, H; Stevanov, K; Kolz, CL; Hakobyan, T; Dong, F; Newby, BMZ; Chilian, WM; Yin, LY (2017) Alignment of inducible vascular progenitor cells on a micro-bundle scaffold improves cardiac repair following myocardial infarction. *Basic Res Cardiol* 112:41. doi:10.1007/s00395-017-0631-4
69. Jung, MR; Ma, YG; Iyer, RP; DeLeon-Pennell, KY; Yabluchanskiy, A; Garrett, MR; Lindsey, ML (2017) IL-10 improves cardiac remodeling after myocardial infarction by stimulating M2 macrophage polarization and fibroblast activation. *Basic Res Cardiol* 112:33. doi:10.1007/s00395-017-0622-5
70. Kingery, JR; Hamid, T; Lewis, RK; Ismahil, MA; Bansal, SS; Rokosh, G; Townes, TM; Ildstad, ST; Jones, SP; Prabhu, SD (2017) Leukocyte iNOS is required for inflammation and pathological remodeling in ischemic heart failure. *Basic Res Cardiol* 112:19. doi:10.1007/s00395-017-0609-2
71. Lassen, TR; Nielsen, JM; Johnsen, J; Ringgaard, S; Botker, HE; Kristiansen, SB (2017) Effect of paroxetine on left ventricular remodeling in an in vivo rat model of myocardial infarction. *Basic Res Cardiol* 112:26. doi:10.1007/s00395-017-0614-5
72. Maciel, L; de Oliveira, DF; da Costa, GCV; Bisch, PM; Nascimento, JHM (2017) Cardioprotection by the transfer of coronary effluent from ischaemic preconditioned rat hearts: identification of cardioprotective humoral factors. *Basic Res Cardiol* 112:52. doi:10.1007/s00395-017-0641-2
73. Pickard, JM; Burke, N; Davidson, SM; Yellon, DM (2017) Intrinsic cardiac ganglia and acetylcholine are important in the mechanism of ischaemic preconditioning. *Basic Res Cardiol* 112:11. doi:10.1007/s00395-017-0601-x
74. Pischke, SE; Gustavsen, A; Orrem, HL; Egge, KH; Courivaud, F; Fontenelle, H; Despont, A; Bongoni, AK; Rieben, R; Tonnessen, TI; Nunn, MA; Scott, H; Skulstad, H; Barratt-Due, A; Mollnes, TE (2017) Complement factor 5 blockade reduces porcine myocardial infarction size and improves immediate cardiac function. *Basic Res Cardiol* 112:20. doi:10.1007/s00395-017-0610-9
75. Rienks, M; Carai, P; Bitsch, N; Schellings, M; Vanhaverbeke, M; Verjans, J; Cuijpers, I; Heymans, S; Papageorgiou, A (2017) Sema3A promotes the resolution of cardiac inflammation after myocardial infarction. *Basic Res Cardiol* 112:42. doi:10.1007/s00395-017-0630-5
76. Rossello, X; Riquelme, JA; He, ZH; Taferner, S; Vanhaesebroeck, B; Davidson, SM; Yellon, DM (2017) The role of PI3K alpha isoform in cardioprotection. *Basic Res Cardiol* 112:66. doi:10.1007/s00395-017-0657-7

77. Tobisawa, T; Yano, T; Tanno, M; Miki, T; Kuno, A; Kimura, Y; Ishikawa, S; Kouzu, H; Nishizawa, K; Yoshida, H; Miura, T (2017) Insufficient activation of Akt upon reperfusion because of its novel modification by reduced PP2A-B55 alpha contributes to enlargement of infarct size by chronic kidney disease. *Basic Res Cardiol* 112:31. doi:10.1007/s00395-017-0621-6
78. Uitterdijk, A; Springeling, T; Hermans, KCM; Merkus, D; de Beer, VJ; Gorsse-Bakker, C; Mokolke, E; Daskalopoulos, EP; Wielopolski, PA; Cleutjens, JPM; Blankesteyn, WM; Prinzen, FW; van der Giessen, WJ; van Geuns, RJM; Duncker, DJ (2017) Intermittent pacing therapy favorably modulates infarct remodeling. *Basic Res Cardiol* 112:28. doi:10.1007/s00395-017-0616-3
79. Yang, G; Zhang, XJ; Weng, XY; Liang, P; Dai, X; Zeng, S; Xu, HH; Huan, HL; Fang, MM; Li, YH; Xu, DC; Xu, Y (2017) SUV39H1 mediated SIRT1 trans-repression contributes to cardiac ischemia-reperfusion injury. *Basic Res Cardiol* 112:22. doi:10.1007/s00395-017-0608-3
80. Audia, JP; Yang, XM; Crockett, ES; Housley, N; Ul Haq, E; O'Donnell, K; Cohen, MV; Downey, JM; Alvarez, DF (2018) Caspase-1 inhibition by VX-765 administered at reperfusion in P2Y<sub>12</sub> receptor antagonist-treated rats provides long-term reduction in myocardial infarct size and preservation of ventricular function. *Basic Res Cardiol* 113:32. doi:10.1007/s00395-018-0692-z
81. Kleinbongard, P; Skyschally, A; Gent, S; Pesch, M; Heusch, G (2018) STAT3 as a common signal of ischemic conditioning: a lesson on rigor and reproducibility in preclinical studies on cardioprotection. *Basic Res Cardiol* 113:3. doi:10.1007/s00395-017-0660-z
82. Kohler, D; Bibli, SI; Klammer, LP; Roth, JM; Lehmann, R; Fleming, I; Granja, TF; Straub, A; Benz, PM; Rosenberger, P (2018) Phosphorylation of vasodilator-stimulated phosphoprotein contributes to myocardial ischemic preconditioning. *Basic Res Cardiol* 113:11. doi:10.1007/s00395-018-0667-0
83. Nuntaphum, W; Pongkan, W; Wongjaikam, S; Thummasorn, S; Tanajak, P; Khamseekaew, J; Intachai, K; Chattipakorn, SC; Chattipakorn, N; Shinlapawittayatorn, K (2018) Vagus nerve stimulation exerts cardioprotection against myocardial ischemia/reperfusion injury predominantly through its efferent vagal fibers. *Basic Res Cardiol* 113:22. doi:10.1007/s00395-018-0683-0
84. Wider, J; Undyala, VVR; Whittaker, P; Woods, J; Chen, XQ; Przyklenk, K (2018) Remote ischemic preconditioning fails to reduce infarct size in the Zucker fatty rat model of type-2 diabetes: role of defective humoral communication. *Basic Res Cardiol* 113:16. doi:10.1007/s00395-018-0674-1
85. Yellon, DM; He, ZH; Khambata, R; Ahluwalia, A; Davidson, SM (2018) The GTN patch: a simple and effective new approach to cardioprotection?. *Basic Res Cardiol* 113:20. doi:10.1007/s00395-018-0681-2
86. Alakoski, T; Ulvila, J; Yrjola, R; Vainio, L; Magga, J; Szabo, Z; Licht, JD; Kerkela, R (2019) Inhibition of cardiomyocyte Sprouty1 protects from cardiac ischemia-reperfusion injury. *Basic Res Cardiol* 114:7. doi:10.1007/s00395-018-0713-y
87. Amanakis, G; Kleinbongard, P; Heusch, G; Skyschally, A (2019) Attenuation of ST-segment elevation after ischemic conditioning maneuvers reflects cardioprotection online. *Basic Res Cardiol* 114:22. doi:10.1007/s00395-019-0732-3
88. Baker, HE; Kiel, AM; Luebbe, ST; Simon, BR; Earl, CC; Regmi, A; Roell, WC; Mather, KJ; Tune, JD; Goodwill, AG (2019) Inhibition of sodium-glucose cotransporter-2 preserves cardiac function during regional myocardial ischemia independent of alterations in myocardial substrate utilization. *Basic Res Cardiol* 114:25. doi:10.1007/s00395-019-0733-2
89. Billah, M; Ridiandries, A; Rayner, BS; Allahwala, UK; Dona, A; Khachigian, LM; Bhindi, R (2019) Egr-1 functions as a master switch regulator of remote ischemic preconditioning-induced cardioprotection. *Basic Res Cardiol* 115:3. doi:10.1007/s00395-019-0763-9
90. Birnbaum, Y; Tran, D; Bajaj, M; Ye, YM (2019) DPP-4 inhibition by linagliptin prevents cardiac dysfunction and inflammation by targeting the Nlrp3/ASC inflammasome. *Basic Res Cardiol* 114:35. doi:10.1007/s00395-019-0743-0
91. Guo, YR; Nong, YB; Tukaye, DN; Rokosh, G; Du, JJ; Zhu, XP; Book, M; Tomlin, A; Li, QH; Bolli, R (2019) Inducible cardiac-specific overexpression of cyclooxygenase-2 (COX-2) confers resistance to ischemia/reperfusion injury. *Basic Res Cardiol* 114:32. doi:10.1007/s00395-019-0741-2
92. Kohlhauer, M; Pell, VR; Burger, N; Spiroski, AM; Gruszczuk, A; Mulvey, JF; Mottahedin, A; Costa, ASH; Frezza, C; Ghaleh, B; Murphy, MP; Tissier, R; Krieg, T (2019) Protection against cardiac ischemia-reperfusion injury by hypothermia and by inhibition of succinate accumulation and oxidation is additive. *Basic Res Cardiol* 114:18. doi:10.1007/s00395-019-0727-0

93. Su, HH; Liao, JM; Wang, YH; Chen, KM; Lin, CW; Lee, IH; Li, YJ; Huang, JY; Tsai, SK; Yen, JC; Huang, SS (2019) Exogenous GDF11 attenuates non-canonical TGF- signaling to protect the heart from acute myocardial ischemia-reperfusion injury. *Basic Res Cardiol* 114:20. doi:10.1007/s00395-019-0728-z
94. ter Horst, EN; Krijnen, PAJ; Hakimzadeh, N; Robbers, LFHJ; Hirsch, A; Nijveldt, R; Lommerse, I; Fontijn, RD; Meinster, E; Delewi, R; van Royen, N; Zijlstra, F; van Rossum, AC; van der Schoot, CE; Kraan, TCTMV; Horrevoets, AJ; van der Laan, AM; Niessen, HWM; Piek, JJ (2019) Elevated monocyte-specific type I interferon signalling correlates positively with cardiac healing in myocardial infarct patients but interferon alpha application deteriorates myocardial healing in rats. *Basic Res Cardiol* 114:1. doi:10.1007/s00395-018-0709-7
95. Wang, MJ; Smith, K; Yu, Q; Miller, C; Singh, K; Sen, CK (2019) Mitochondrial connexin 43 in sex-dependent myocardial responses and estrogen-mediated cardiac protection following acute ischemia/reperfusion injury. *Basic Res Cardiol* 115:1. doi:10.1007/s00395-019-0759-5
96. Wu, L; Tan, JL; Chen, ZY; Huang, G (2019) Cardioprotection of post-ischemic moderate ROS against ischemia/reperfusion via STAT3-induced the inhibition of MCU opening. *Basic Res Cardiol* 114:39. doi:10.1007/s00395-019-0747-9
97. Bakhta, O; Pascaud, A; Dieu, X; Beaumont, J; Nzougnet, JK; Kamel, R; Croyal, M; Tamareille, S; Simard, G; de la Barca, JMC; Reynier, P; Prunier, F; Mirebeau-Prunier, D (2020) Tryptophan-kynurenine pathway in the remote ischemic conditioning mechanism. *Basic Res Cardiol* 115:13. doi:10.1007/s00395-019-0770-x
98. Behrouzi, B; Weyers, JJ; Qi, XL; Barry, J; Rabadia, V; Manca, D; Connelly, J; Spino, M; Wood, JC; Strauss, BH; Wright, GA; Ghugre, NR (2020) Action of iron chelator on intramyocardial hemorrhage and cardiac remodeling following acute myocardial infarction. *Basic Res Cardiol* 115:24. doi:10.1007/s00395-020-0782-6
99. He, ZH; Davidson, SM; Yellon, DM (2020) The importance of clinically relevant background therapy in cardioprotective studies. *Basic Res Cardiol* 115:69. doi:10.1007/s00395-020-00830-y
100. Heimerl, M; Sieve, I; Ricke-Hoch, M; Erschow, S; Battmer, K; Scherr, M; Hilfiker-Kleiner, D (2020) Neuraminidase-1 promotes heart failure after ischemia/reperfusion injury by affecting cardiomyocytes and invading monocytes/macrophages. *Basic Res Cardiol* 115:62. doi:10.1007/s00395-020-00821-z
101. Liu, SJ; Chen, J; Shi, J; Zhou, WY; Wang, L; Fang, WL; Zhong, Y; Chen, XH; Chen, YF; Sabri, A; Liu, SM (2020) M1-like macrophage-derived exosomes suppress angiogenesis and exacerbate cardiac dysfunction in a myocardial infarction microenvironment. *Basic Res Cardiol* 115:22. doi:10.1007/s00395-020-0781-7
102. Lobo-Gonzalez, M; Galan-Arriola, C; Rossello, X; Gonzalez-Del-Hoyo, M; Vilchez, JP; Higuero-Verdejo, MI; Garcia-Ruiz, JM; Lopez-Martin, GJ; Sanchez-Gonzalez, J; Oliver, E; Pizarro, G; Fuster, V; Ibanez, B (2020) Metoprolol blunts the time-dependent progression of infarct size. *Basic Res Cardiol* 115:55. doi:10.1007/s00395-020-0812-4
103. Mendieta, G; Ben-Aicha, S; Casani, L; Badimon, L; Sabate, M; Vilahur, G (2020) Molecular pathways involved in the cardioprotective effects of intravenous statin administration during ischemia. *Basic Res Cardiol* 115:2. doi:10.1007/s00395-019-0760-z
104. Sawashita, Y; Hirata, N; Yoshikawa, Y; Terada, H; Tokinaga, Y; Yamakage, M (2020) Remote ischemic preconditioning reduces myocardial ischemia-reperfusion injury through unacylated ghrelin-induced activation of the JAK/STAT pathway. *Basic Res Cardiol* 115:50. doi:10.1007/s00395-020-0809-z
105. Sun, X; Wei, ZL; Li, YY; Wang, JZ; Hu, JX; Yin, Y; Xie, J; Xu, B (2020) Renal denervation restrains the inflammatory response in myocardial ischemia-reperfusion injury. *Basic Res Cardiol* 115:15. doi:10.1007/s00395-020-0776-4
106. Takov, K; He, ZH; Johnston, HE; Timms, JF; Guillot, PV; Yellon, DM; Davidson, SM (2020) Small extracellular vesicles secreted from human amniotic fluid mesenchymal stromal cells possess cardioprotective and promigratory potential. *Basic Res Cardiol* 115:26. doi:10.1007/s00395-020-0785-3
107. Vatner, DE; Oydanich, M; Zhang, J; Babici, D; Vatner, SF (2020) Secreted frizzled-related protein 2, a novel mechanism to induce myocardial ischemic protection through angiogenesis. *Basic Res Cardiol* 115:48. doi:10.1007/s00395-020-0808-0

108. Wang, JZ; Chen, ZW; Dai, Q; Zhao, JX; Wei, ZL; Hui, JX; Sun, X; Xie, J; Xu, B (2020) Intravenously delivered mesenchymal stem cells prevent microvascular obstruction formation after myocardial ischemia/reperfusion injury. *Basic Res Cardiol* 115:40. doi:10.1007/s00395-020-0800-8
109. Zhou, H; Toan, S; Zhu, PJ; Wang, J; Ren, J; Zhang, YM (2020) DNA-PKcs promotes cardiac ischemia reperfusion injury through mitigating BI-1-governed mitochondrial homeostasis. *Basic Res Cardiol* 115:11. doi:10.1007/s00395-019-0773-7
110. Cheng, ZJ; Zhang, H; Zhang, L; Wang, XJ; Zhang, QJ; Feng, MW; Hu, DL; Li, H; Qian, LM (2021) Exercise-induced peptide TAG-23 protects cardiomyocytes from reperfusion injury through regulating PKG-cCbl interaction. *Basic Res Cardiol* 116:41. doi:10.1007/s00395-021-00878-4
111. Hekkert, MT; Newton, G; Chapman, K; Aqil, R; Downham, R; Yan, R; Merkus, D; Whitlock, G; Lane, CAL; Cawkill, D; Perrior, T; Duncker, DJ; Schneider, MD (2021) Preclinical trial of a MAP4K4 inhibitor to reduce infarct size in the pig: does cardioprotection in human stem cell-derived myocytes predict success in large mammals?. *Basic Res Cardiol* 116:34. doi:10.1007/s00395-021-00875-7
112. Hirschhauser, C; Lissoni, A; Gorge, PM; Lampe, PD; Heger, J; Schluter, KD; Leybaert, L; Schulz, R; Boengler, K (2021) Connexin 43 phosphorylation by casein kinase 1 is essential for the cardioprotection by ischemic preconditioning. *Basic Res Cardiol* 116:21. doi:10.1007/s00395-021-00861-z
113. Lai, Q; Yuan, GY; Shen, L; Zhang, L; Fu, F; Liu, ZL; Zhang, YY; Kou, JP; Liu, SJ; Yu, BY; Li, F (2021) Oxoeicosanoid receptor inhibition alleviates acute myocardial infarction through activation of BCAT1. *Basic Res Cardiol* 116:3. doi:10.1007/s00395-021-00844-0
114. Li, S; Chen, JX; Liu, MY; Chen, YQ; Wu, Y; Li, QY; Ma, T; Gao, JF; Xia, Y; Fan, MK; Chen, A; Lu, DB; Su, EY; Xu, F; Chen, ZW; Qian, JY; Ge, JB (2021) Protective effect of HINT2 on mitochondrial function via repressing MCU complex activation attenuates cardiac microvascular ischemia-reperfusion injury. *Basic Res Cardiol* 116:65. doi:10.1007/s00395-021-00905-4
115. Lieder, HR; Braczko, F; Gedik, N; Stroetges, M; Heusch, G; Kleinbongard, P (2021) Cardioprotection by post-conditioning with exogenous triiodothyronine in isolated perfused rat hearts and isolated adult rat cardiomyocytes. *Basic Res Cardiol* 116:27. doi:10.1007/s00395-021-00868-6
116. Liu, N; Kataoka, M; Wang, YC; Pu, LB; Dong, XX; Fu, XY; Zhang, F; Gao, F; Liang, T; Pei, JQ; Xiao, CC; Qiu, QZ; Hong, TT; Chen, QM; Zhao, J; Zhu, LL; He, JH; Hu, XY; Nie, Y; Zhu, W; Yu, H; Cowan, DB; Hu, XY; Wang, JA; Wang, DZ; Chen, JH (2021) LncRNA LncHrt preserves cardiac metabolic homeostasis and heart function by modulating the LKB1-AMPK signaling pathway. *Basic Res Cardiol* 116:48. doi:10.1007/s00395-021-00887-3
117. Zhang, HL; Yang, NZ; He, HY; Chai, JW; Cheng, XX; Zhao, HH; Zhou, DM; Teng, TM; Kong, XR; Yang, Q; Xu, ZL (2021) The zinc transporter ZIP7 (Slc39a7) controls myocardial reperfusion injury by regulating mitophagy. *Basic Res Cardiol* 116:54. doi:10.1007/s00395-021-00894-4
118. Fu, WB; Ren, HM; Shou, JL; Liao, Q; Li, LP; Shi, Y; Jose, PA; Zeng, CY; Wang, WE (2022) Loss of NPPA-AS1 promotes heart regeneration by stabilizing SFPQ-NONO heteromer-induced DNA repair. *Basic Res Cardiol* 117:10. doi:10.1007/s00395-022-00921-y
119. Hess, A; Borchert, T; Ross, TL; Bengel, FM; Thackeray, JT (2022) Characterizing the transition from immune response to tissue repair after myocardial infarction by multiparametric imaging. *Basic Res Cardiol* 117:14. doi:10.1007/s00395-022-00922-x
120. Jiao, T; Collado, A; Mahdi, A; Jurga, J; Tengbom, J; Saleh, N; Verouhis, D; Bohm, F; Zhou, ZC; Yang, JN; Pernow, J (2022) Erythrocytes from patients with ST-elevation myocardial infarction induce cardioprotection through the purinergic P2Y(13) receptor and nitric oxide signaling. *Basic Res Cardiol* 117:46. doi:10.1007/s00395-022-00953-4
121. Kleinbongard, P; Lieder, HR; Skyschally, A; Alloosh, M; Godecke, A; Rahmann, S; Sturek, M; Heusch, G (2022) Non-responsiveness to cardioprotection by ischaemic preconditioning in Ossabaw minipigs with genetic predisposition to, but without the phenotype of the metabolic syndrome. *Basic Res Cardiol* 117:58. doi:10.1007/s00395-022-00965-0
122. Nikolaou, PE; Mylonas, N; Makridakis, M; Makreka-Kuka, M; Iliou, A; Zerikiotis, S; Efentakis, P; Kampoukos, S; Kostomitsopoulos, N; Vilskersts, R; Ikonomidis, I; Lambadiari, V; Zuurbier, CJ; Latosinska, A; Vlahou, A; Dimitriadis, G; Iliodromitis, EK; Andreadou, I (2022) Cardioprotection by selective SGLT-2 inhibitors in a non-diabetic mouse model of myocardial ischemia/reperfusion injury: a class or a drug effect?. *Basic Res Cardiol* 117:27. doi:10.1007/s00395-022-00934-7
123. Starz, C; Hardtner, C; Mauler, M; Dufner, B; Hoppe, N; Krebs, K; Ehlert, CA; Merz, J; Heidt, T; Stachon, P; Wolf, D; Bode, C; von zur Muehlen, C; Rottbauer, W; Gawaz, M; Duerschmied, D;

- Leuschner, F; Borst, O; Westermann, D; Hilgendorf, I (2022) Elevated platelet-leukocyte complexes are associated with, but dispensable for myocardial ischemia-reperfusion injury. *Basic Res Cardiol* 117:61. doi:10.1007/s00395-022-00970-3
124. Wu, C; Liu, RR; Luo, ZF; Sun, MY; Qile, M; Xu, SJ; Jin, SY; Zhang, L; Gross, ER; Zhang, Y; He, SF (2022) Spinal cord astrocytes regulate myocardial ischemia-reperfusion injury. *Basic Res Cardiol* 117:56. doi:10.1007/s00395-022-00968-x
125. Xing, YH; Sui, ZH; Liu, YC; Wang, MM; Wei, XQ; Lu, QX; Wang, XY; Liu, N; Lu, C; Chen, R; Wu, MM; Wang, YQ; Zhao, YH; Guo, F; Cao, JL; Qi, JS; Wang, WY (2022) Blunting TRPML1 channels protects myocardial ischemia/reperfusion injury by restoring impaired cardiomyocyte autophagy. *Basic Res Cardiol* 117:20. doi:10.1007/s00395-022-00930-x
126. Xu, Y; Jiang, K; Chen, F; Qian, J; Wang, DD; Wu, YZ; Zhou, CJ; Yu, Y; Chen, K; Hwa, O; Yang, B; Wang, HY; Xiang, YZ (2022) Bone marrow-derived naive B lymphocytes improve heart function after myocardial infarction: a novel cardioprotective mechanism for empagliflozin. *Basic Res Cardiol* 117:47. doi:10.1007/s00395-022-00956-1
127. Bassiouni, W; Valencia, R; Mahmud, Z; Seubert, JM; Schulz, R (2023) Matrix metalloproteinase-2 proteolyzes mitofusin-2 and impairs mitochondrial function during myocardial ischemia-reperfusion injury. *Basic Res Cardiol* 118:29. doi:10.1007/s00395-023-00999-y
128. Dang, YN; Hua, WJ; Zhang, XT; Sun, H; Zhang, YJ; Yu, BB; Wang, SR; Zhang, M; Kong, ZH; Pan, DJ; Chen, Y; Li, SR; Yuan, L; Reinhardt, JD; Lu, X; Zheng, Y (2023) Anti-angiogenic effect of exo-LncRNA TUG1 in myocardial infarction and modulation by remote ischemic conditioning. *Basic Res Cardiol* 118:1. doi:10.1007/s00395-022-00975-y
129. Kleinbongard, P.; Lieder, H.R.; Skyschally, A. (2023) No robust reduction of infarct size and no-reflow by metoprolol pretreatment in adult Göttingen minipigs. *Basic Res Cardiol* 118:23. doi:10.1007/s00395-023-00993-4
130. Konijnenberg, LSF; Luiken, TTJ; Veltien, A; Uthman, L; Kuster, CTA; Rodwell, L; de Waard, GA; Lindert, MKT; Akiva, A; Thijssen, DHJ; Nijveldt, R; van Royen, N (2023) Imatinib attenuates reperfusion injury in a rat model of acute myocardial infarction. *Basic Res Cardiol* 118:2. doi:10.1007/s00395-022-00974-z
131. Schneckmann, R; Doring, M; Gerfer, S; Gorressen, S; Heitmeier, S; Helten, C; Polzin, A; Jung, C; Kelm, M; Fender, AC; Flogel, U; Grandoch, M (2023) Rivaroxaban attenuates neutrophil maturation in the bone marrow niche. *Basic Res Cardiol* 118:31. doi:10.1007/s00395-023-01001-5
132. Schunke, KJ; Rodriguez, J; Dyavanapalli, J; Schloen, J; Wang, X; Escobar, J; Kowalik, G; Cheung, EC; Ribeiro, C; Russo, R; Alber, BR; Dergacheva, O; Chen, SW; Murillo-Berlitz, AE; Lee, KB; Trachiotis, G; Entcheva, E; Brantner, CA; Mendelowitz, D; Kay, MW (2023) Outcomes of hypothalamic oxytocin neuron-driven cardioprotection after acute myocardial infarction. *Basic Res Cardiol* 118:43. doi:10.1007/s00395-023-01013-1
133. Szulik, MW; Valdez, S; Walsh, M; Davis, K; Bia, R; Horiuchi, E; O'Very, S; Laxman, AK; Sandaklie-Nicolova, L; Eberhardt, DR; Durrant, JR; Sheikh, H; Hickenlooper, S; Creed, M; Brady, C; Miller, M; Wang, L; Garcia-Llana, J; Tracy, C; Drakos, SG; Funai, K; Chaudhuri, D; Boudina, S; Franklin, S (2023) SMYD1a protects the heart from ischemic injury by regulating OPA1-mediated cristae remodeling and supercomplex formation. *Basic Res Cardiol* 118:20. doi:10.1007/s00395-023-00991-6
134. Teixeira, RB; Pfeiffer, M; Zhang, P; Shafique, E; Rayta, B; Karbasiafshar, C; Ahsan, N; Sellke, FW; Abid, MR (2023) Reduction in mitochondrial ROS improves oxidative phosphorylation and provides resilience to coronary endothelium in non-reperfused myocardial infarction. *Basic Res Cardiol* 118:3. doi:10.1007/s00395-022-00976-x
135. Umbarkar, P; Ejantkar, S; Ramirez, SYR; Cora, AT; Zhang, QK; Tousif, S; Lal, H (2023) Cardiac fibroblast GSK-3 $\alpha$  aggravates ischemic cardiac injury by promoting fibrosis, inflammation, and impairing angiogenesis. *Basic Res Cardiol* 118:35. doi:10.1007/s00395-023-01005-1
136. Xie, DN; Guo, HL; Li, MB; Jia, LQ; Zhang, H; Liang, DG; Wu, NS; Yang, ZQ; Tian, YK (2023) Splenic monocytes mediate inflammatory response and exacerbate myocardial ischemia/reperfusion injury in a mitochondrial cell-free DNA-TLR9-NLRP3-dependent fashion. *Basic Res Cardiol* 118:44. doi:10.1007/s00395-023-01014-0
137. Xie, J; Jiang, LJ; Wang, JZ; Yin, Y; Wang, RL; Du, LP; Chen, T; Ni, ZC; Qiao, SH; Gong, H; Xu, B; Xu, QB (2023) Multilineage contribution of CD34 $^{+}$  cells in cardiac remodeling after ischemia/reperfusion injury. *Basic Res Cardiol* 118:17. doi:10.1007/s00395-023-00981-8

138. Zhong, LF; Han, JB; Fan, XX; Huang, ZQ; Su, L; Cai, XL; Lin, S; Chen, XD; Huang, WJ; Dai, SS; Ye, BZ (2023) Novel GSDMD inhibitor GI-Y1 protects heart against pyroptosis and ischemia/reperfusion injury by blocking pyroptotic pore formation. *Basic Res Cardiol* 118:40. doi:10.1007/s00395-023-01010-4
139. Frasier, CR; Moukdar, F; Patel, HD; Sloan, RC; Stewart, LM; Alleman, RJ; La Favor, JD; Brown, DA (2013) Redox-dependent increases in glutathione reductase and exercise preconditioning: role of NADPH oxidase and mitochondria. *Cardiovasc Res* 98:47-55. doi:10.1093/cvr/cvt009
140. Hiroi, T; Wajima, T; Negoro, T; Ishii, M; Nakano, Y; Kiuchi, Y; Mori, Y; Shimizu, S (2013) Neutrophil TRPM2 channels are implicated in the exacerbation of myocardial ischaemia/reperfusion injury. *Cardiovasc Res* 97:271-281. doi:10.1093/cvr/cvs332
141. Jiang, BM; Zhang, B; Liang, PF; Chen, GW; Zhou, B; Lv, CL; Tu, ZZ; Xiao, XZ (2013) Nucleolin protects the heart from ischaemiareperfusion injury by up-regulating heat shock protein 32. *Cardiovasc Res* 99:92-101. doi:10.1093/cvr/cvt085
142. Li, JJ; Zhang, YY; Li, CF; Xie, J; Liu, Y; Zhu, WN; Zhang, XJ; Jiang, SR; Liu, L; Ding, ZN (2013) HSPA12B attenuates cardiac dysfunction and remodelling after myocardial infarction through an eNOS-dependent mechanism. *Cardiovasc Res* 99:674-684. doi:10.1093/cvr/cvt139
143. Liu, Y; Ye, XY; Mao, LN; Cheng, ZK; Yao, XP; Jia, XH; Mao, D; Ou, LL; Li, ZJ; Che, YZ; Liu, N; Steinhoff, G; Liu, L; Kong, DL (2013) Transplantation of parthenogenetic embryonic stem cells ameliorates cardiac dysfunction and remodelling after myocardial infarction. *Cardiovasc Res* 97:208-218. doi:10.1093/cvr/cvs314
144. Pereira, FE; Cronin, C; Ghosh, M; Zhou, SY; Agosto, M; Subramani, J; Wang, RB; Shen, JB; Schacke, W; Liang, B; Yang, TH; McAulliffe, B; Liang, BT; Shapiro, LH (2013) CD13 is essential for inflammatory trafficking and infarct healing following permanent coronary artery occlusion in mice. *Cardiovasc Res* 100:74-83. doi:10.1093/cvr/cvt155
145. Sandanger, O; Ranheim, T; Vinge, LE; Bliksoen, M; Alfsnes, K; Finsen, AV; Dahl, CP; Askevold, ET; Florholmen, G; Christensen, G; Fitzgerald, KA; Lien, E; Valen, G; Espevik, T; Aukrust, P; Yndestad, A (2013) The NLRP3 inflammasome is up-regulated in cardiac fibroblasts and mediates myocardial ischaemiareperfusion injury. *Cardiovasc Res* 99:164-174. doi:10.1093/cvr/cvt091
146. Uchinaka, A; Kawaguchi, N; Hamada, Y; Mori, S; Miyagawa, S; Saito, A; Sawa, Y; Matsuura, N (2013) Transplantation of myoblast sheets that secrete the novel peptide SVVYGLR improves cardiac function in failing hearts. *Cardiovasc Res* 99:102-110. doi:10.1093/cvr/cvt088
147. Wang, XH; Ha, TZ; Liu, L; Zou, JH; Zhang, X; Kalbfleisch, J; Gao, X; Williams, D; Li, CF (2013) Increased expression of microRNA-146a decreases myocardial ischaemia/reperfusion injury. *Cardiovasc Res* 97:432-442. doi:10.1093/cvr/cvs356
148. Whittington, HJ; Harding, I; Stephenson, CIM; Bell, R; Hausenloy, DJ; Mocanu, MM; Yellon, DM (2013) Cardioprotection in the aging, diabetic heart: the loss of protective Akt signalling. *Cardiovasc Res* 99:694-704. doi:10.1093/cvr/cvt140
149. Yang, CJ; Talukder, MAH; Varadharaj, S; Velayutham, M; Zweier, JL (2013) Early ischaemic preconditioning requires Akt- and PKA-mediated activation of eNOS via serine1176 phosphorylation. *Cardiovasc Res* 97:33-43. doi:10.1093/cvr/cvs287
150. Barile, L; Lionetti, V; Cervio, E; Matteucci, M; Gherghiceanu, M; Popescu, LM; Torre, T; Siclari, F; Moccetti, T; Vassalli, G (2014) Extracellular vesicles from human cardiac progenitor cells inhibit cardiomyocyte apoptosis and improve cardiac function after myocardial infarction. *Cardiovasc Res* 103:530-541. doi:10.1093/cvr/cvu167
151. Bice, JS; Keim, Y; Stasch, JP; Baxter, GF (2014) NO-independent stimulation or activation of soluble guanylyl cyclase during early reperfusion limits infarct size. *Cardiovasc Res* 101:220-228. doi:10.1093/cvr/cvt257
152. De Hoog, VC; Timmers, L; Van Duijvenvoorde, A; De Jager, SCA; Van Middelaar, BJ; Smeets, MB; Woodruff, TM; Doevendans, PA; Pasterkamp, G; Hack, CE; De Kleijn, DPV (2014) Leucocyte expression of complement C5a receptors exacerbates infarct size after myocardial reperfusion injury. *Cardiovasc Res* 103:521-529. doi:10.1093/cvr/cvu153
153. Gu, JM; Fan, YQ; Liu, XB; Zhou, LH; Cheng, JK; Cai, R; Xue, S (2014) SENP1 protects against myocardial ischaemia/reperfusion injury via a HIF1 alpha-dependent pathway. *Cardiovasc Res* 104:83-92. doi:10.1093/cvr/cvu177



154. Herzog, C; Lorenz, A; Gillmann, HJ; Chowdhury, A; Larmann, J; Harendza, T; Echtermeyer, F; Muller, M; Schmitz, M; Stypmann, J; Seidler, DG; Damm, M; Stehr, SN; Koch, T; Wollert, KC; Conway, EM; Theilmeyer, G (2014) Thrombomodulin's lectin-like domain reduces myocardial damage by interfering with HMGB1-mediated TLR2 signalling. *Cardiovasc Res* 101:400-410. doi:10.1093/cvr/cvt275
155. Inserte, J; Hernando, V; Ruiz-Meana, M; Poncelas-Nozal, M; Fernandez, C; Agullo, L; Sartorio, C; Vilarrosa, U; Garcia-Dorado, D (2014) Delayed phospholamban phosphorylation in post-conditioned heart favours Ca<sup>2+</sup> normalization and contributes to protection. *Cardiovasc Res* 103:542-553. doi:10.1093/cvr/cvu163
156. Jiang, BM; Liang, PF; Wang, KK; Lv, CL; Sun, L; Tong, ZY; Liu, YJ; Xiao, XZ (2014) Nucleolin involved in myocardial ischaemic preconditioning via post-transcriptional control of HSPA1A expression. *Cardiovasc Res* 102:56-67. doi:10.1093/cvr/cvu006
157. Jiang, SX; Streeter, J; Schickling, BM; Zimmerman, K; Weiss, RM; Miller, FJ (2014) Nox1 NADPH oxidase is necessary for late but not early myocardial ischaemic preconditioning. *Cardiovasc Res* 102:79-87. doi:10.1093/cvr/cvu027
158. Kang, J; Yun, JY; Hur, J; Kang, JA; Choi, JI; Ko, SB; Lee, J; Kim, JY; Hwang, IC; Park, YB; Kim, HS (2014) Erythropoietin priming improves the vasculogenic potential of G-CSF mobilized human peripheral blood mononuclear cells. *Cardiovasc Res* 104:171-182. doi:10.1093/cvr/cvu180
159. Li, JY; Chen, XQ; McClusky, R; Ruiz-Sundstrom, M; Itoh, Y; Umar, S; Arnold, AP; Eghbali, M (2014) The number of X chromosomes influences protection from cardiac ischaemia/reperfusion injury in mice: one X is better than two. *Cardiovasc Res* 102:-. doi:10.1093/cvr/cvu064
160. Lopez-Olaneta, MM; Villalba, M; Gomez-Saliner, JM; Jimenez-Borreguero, LJ; Breckenridge, R; Ortiz-Sanchez, P; Garcia-Pavia, P; Ibanez, B; Lara-Pezzi, E (2014) Induction of the calcineurin variant CnA beta 1 after myocardial infarction reduces post-infarction ventricular remodelling by promoting infarct vascularization. *Cardiovasc Res* 102:396-406. doi:10.1093/cvr/cvu068
161. Luedde, M; Lutz, M; Carter, N; Sosna, J; Jacoby, C; Vucur, M; Gautheron, J; Roderburg, C; Borg, N; Reisinger, F; Hippe, HJ; Linkermann, A; Wolf, MJ; Rose-John, S; Lullmann-Rauch, R; Adam, D; Flogel, U; Heikenwalder, M; Luedde, T; Frey, N (2014) RIP3, a kinase promoting necroptotic cell death, mediates adverse remodelling after myocardial infarction. *Cardiovasc Res* 103:206-216. doi:10.1093/cvr/cvu146
162. Morel, S; Braunersreuther, V; Chanson, M; Bouis, D; Rochemont, V; Foglia, B; Pelli, G; Sutter, E; Pinsky, DJ; Mach, F; Kwak, BR (2014) Endothelial Cx40 limits myocardial ischaemia/reperfusion injury in mice. *Cardiovasc Res* 102:329-337. doi:10.1093/cvr/cvu063
163. Ong, SG; Lee, WH; Theodorou, L; Kodo, K; Lim, SY; Shukla, DH; Briston, T; Kiriakidis, S; Ashcroft, M; Davidson, SM; Maxwell, PH; Yellon, DM; Hausenloy, DJ (2014) HIF-1 reduces ischaemia-reperfusion injury in the heart by targeting the mitochondrial permeability transition pore. *Cardiovasc Res* 104:24-36. doi:10.1093/cvr/cvu172
164. Pride, CK; Mo, L; Quesnelle, K; Dagda, RK; Murillo, D; Geary, L; Corey, C; Portella, R; Zharikov, S; St Croix, C; Maniar, S; Chu, CT; Khoo, NH; Shiva, S (2014) Nitrite activates protein kinase A in normoxia to mediate mitochondrial fusion and tolerance to ischaemia/reperfusion. *Cardiovasc Res* 101:57-68. doi:10.1093/cvr/cvt224
165. Saxena, A; Bujak, M; Frunza, O; Dobaczewski, M; Gonzalez-Quesada, C; Lu, B; Gerard, C; Frangogiannis, NG (2014) CXCR3-independent actions of the CXC chemokine CXCL10 in the infarcted myocardium and in isolated cardiac fibroblasts are mediated through proteoglycans. *Cardiovasc Res* 103:217-227. doi:10.1093/cvr/cvu138
166. Wang, XH; Ha, TZ; Zou, JH; Ren, DY; Liu, L; Zhang, X; Kalbfleisch, J; Gao, X; Williams, D; Li, CF (2014) MicroRNA-125b protects against myocardial ischaemia/reperfusion injury via targeting p53-mediated apoptotic signalling and TRAF6. *Cardiovasc Res* 102:385-395. doi:10.1093/cvr/cvu044
167. Wu, M; Zhou, JL; Cheng, M; Boriboun, C; Biyashev, D; Wang, H; Mackie, A; Thorne, T; Chou, J; Wu, YP; Chen, ZS; Liu, QH; Yan, HB; Yang, Y; Jie, CF; Tang, YL; Zhao, TC; Taylor, RN; Kishore, R; Losordo, DW; Qin, GJ (2014) E2F1 suppresses cardiac neovascularization by down-regulating VEGF and PIGF expression. *Cardiovasc Res* 104:412-422. doi:10.1093/cvr/cvu222
168. Wu, W; Hu, YP; Li, JT; Zhu, WN; Ha, TZ; Que, LL; Liu, L; Zhu, Q; Chen, Q; Xu, Y; Li, CF; Li, YH (2014) Silencing of Pellino1 improves post-infarct cardiac dysfunction and attenuates left ventricular remodelling in mice. *Cardiovasc Res* 102:46-55. doi:10.1093/cvr/cvu007

169. Albuquerque-Bejar, JJ; Barba, I; Inserte, J; Miro-Casas, E; Ruiz-Meana, M; Poncelas, M; Vilardosa, U; Valls-Lacalle, L; Rodriguez-Sinovas, A; Garcia-Dorado, D (2015) Combination therapy with remote ischaemic conditioning and insulin or exenatide enhances infarct size limitation in pigs. *Cardiovasc Res* 107:246-254. doi:10.1093/cvr/cvv171
170. Andersson, L; Tang, MS; Lundqvist, A; Lindbom, M; Mardani, I; Fogelstrand, P; Shahrouki, P; Redfors, B; Omerovic, E; Levin, M; Boren, J; Levin, MC (2015) Rip2 modifies VEGF-induced signalling and vascular permeability in myocardial ischaemia. *Cardiovasc Res* 107:478-486. doi:10.1093/cvr/cvv186
171. Bandaru, S; Gronros, J; Redfors, B; Cil, C; Pazooki, D; Salimi, R; Larsson, E; Zhou, AX; Omerovic, E; Akyurek, LM (2015) Deficiency of filamin A in endothelial cells impairs left ventricular remodelling after myocardial infarction. *Cardiovasc Res* 105:151-159. doi:10.1093/cvr/cvu226
172. Bibli, SI; Andreadou, I; Chatzianastasiou, A; Tzimas, C; Sanoudou, D; Kranias, E; Brouckaert, P; Coletta, C; Szabo, C; KremastiNOS, DT; Iliodromitis, EK; Papapetropoulos, A (2015) Cardioprotection by H2S engages a cGMP-dependent protein kinase G/phospholamban pathway. *Cardiovasc Res* 106:432-442. doi:10.1093/cvr/cvv129
173. Chen, YX; Liu, JL; Zheng, YJ; Wang, JX; Wang, ZH; Gu, SS; Tan, JL; Jing, Q; Yang, HT (2015) Uncoupling protein 3 mediates H2O2 preconditioning-afforded cardioprotection through the inhibition of MPTP opening. *Cardiovasc Res* 105:192-202. doi:10.1093/cvr/cvu256
174. Davidson, SM; Foote, K; Kunuthur, S; Gosain, R; Tan, N; Tyser, R; Zhao, YJ; Graeff, R; Ganesan, A; Duchon, MR; Patel, S; Yellon, DM (2015) Inhibition of NAADP signalling on reperfusion protects the heart by preventing lethal calcium oscillations via two-pore channel 1 and opening of the mitochondrial permeability transition pore. *Cardiovasc Res* 108:357-366. doi:10.1093/cvr/cvv226
175. de Hoog, VC; Bovens, SM; de Jager, SCA; van Middelaar, BJ; van Duijvenvoorde, A; Doevendans, PA; Pasterkamp, G; de Kleijn, DPV; Timmers, L (2015) BLT1 antagonist LSN2792613 reduces infarct size in a mouse model of myocardial ischaemia-reperfusion injury. *Cardiovasc Res* 108:367-376. doi:10.1093/cvr/cvv224
176. Du, M; Huang, K; Huang, D; Yang, L; Gao, L; Wang, XJ; Huang, DD; Li, XR; Wang, C; Zhang, FX; Wang, Y; Cheng, M; Tong, QS; Qin, GJ; Huang, K; Wang, L (2015) Renalase is a novel target gene of hypoxia-inducible factor-1 in protection against cardiac ischaemia-reperfusion injury. *Cardiovasc Res* 105:182-191. doi:10.1093/cvr/cvu255
177. Esposito, G; Schiattarella, GG; Perrino, C; Cattaneo, F; Pironti, G; Franzone, A; Gargiulo, G; Magliulo, F; Serino, F; Carotenuto, G; Sannino, A; Ilardi, F; Scudiero, F; Brevetti, L; Olivetti, M; Giugliano, G; Del Giudice, C; Ciccarelli, M; Renzone, G; Scaloni, A; Zambrano, N; Trimarco, B (2015) Dermcidin: a skeletal muscle myokine modulating cardiomyocyte survival and infarct size after coronary artery ligation. *Cardiovasc Res* 107:431-441. doi:10.1093/cvr/cvv173
178. Lucas, A; Mialet-Perez, J; Daviaud, D; Parini, A; Marber, MS; Sicard, P (2015) Gadd45 gamma regulates cardiomyocyte death and post-myocardial infarction left ventricular remodelling. *Cardiovasc Res* 108:254-267. doi:10.1093/cvr/cvv219
179. Basalay, MV; Mastitskaya, S; Mrochek, A; Ackland, GL; del Arroyo, AG; Sanchez, J; Sjoquist, PO; Pernow, J; Gourine, AV; Gourine, A (2016) Glucagon-like peptide-1 (GLP-1) mediates cardioprotection by remote ischaemic conditioning. *Cardiovasc Res* 112:669-676. doi:10.1093/cvr/cvw216
180. Booij, HG; Yu, HJ; De Boer, RA; van de Kolk, CWA; van de Sluis, B; Van Deursen, JM; Van Gilst, WH; Sillje, HHW; Westenbrink, BD (2016) Overexpression of A kinase interacting protein 1 attenuates myocardial ischaemia/reperfusion injury but does not influence heart failure development. *Cardiovasc Res* 111:217-226. doi:10.1093/cvr/cvw161
181. Eerenberg, ES; Teunissen, PFA; van den Born, BJ; Meijers, JCM; Hollander, MR; Jansen, M; Tijssen, R; Belien, JAM; van de Ven, PM; Aly, MF; Kamp, O; Niessen, HW; Kamphuisen, PW; Levi, M; van Royen, N (2016) The role of ADAMTS13 in acute myocardial infarction: cause or consequence?. *Cardiovasc Res* 111:194-203. doi:10.1093/cvr/cvw097
182. Gonzalez-Santamaria, J; Villalba, M; Busnadiego, O; Lopez-Olaneta, MM; Sandoval, P; Snabel, J; Lopez-Cabrera, M; Erler, JT; Hanemaaijer, R; Lara-Pezzi, E; Rodriguez-Pascual, F (2016) Matrix cross-linking lysyl oxidases are induced in response to myocardial infarction and promote cardiac dysfunction. *Cardiovasc Res* 109:67-78. doi:10.1093/cvr/cvv214
183. Hu, ZY; Crump, SM; Zhang, P; Abbott, GW (2016) Kcne2 deletion attenuates acute post-ischaemia/reperfusion myocardial infarction. *Cardiovasc Res* 110:227-237. doi:10.1093/cvr/cvw048

184. Kan, XY; Wu, YN; Ma, YC; Zhang, CC; Li, P; Wu, LF; Zhang, S; Li, YL; Du, J (2016) Deficiency of IL-12p35 improves cardiac repair after myocardial infarction by promoting angiogenesis. *Cardiovasc Res* 109:249-259. doi:10.1093/cvr/cvv255
185. Kumagai, S; Nakayama, H; Fujimoto, M; Honda, H; Serada, S; Ishibashi-Ueda, H; Kasai, A; Obana, M; Sakata, Y; Sawa, Y; Fujio, Y; Naka, T (2016) Myeloid cell-derived LRG attenuates adverse cardiac remodelling after myocardial infarction. *Cardiovasc Res* 109:272-282. doi:10.1093/cvr/cvv273
186. Matteucci, M; Casieri, V; Gabisonia, K; Aquaro, GD; Agostini, S; Pollio, G; Diamanti, D; Rossi, M; Travagli, M; Porcari, V; Recchia, FA; Lionetti, V (2016) Magnetic resonance imaging of infarct-induced canonical wntless/integrated (Wnt)/beta-catenin/T-cell factor pathway activation, in vivo. *Cardiovasc Res* 112:645-655. doi:10.1093/cvr/cvw214
187. Morel, S; Christoffersen, C; Axelsen, LN; Montecucco, F; Rochemont, V; Frias, MA; Mach, F; James, RW; Naus, CC; Chanson, M; Lampe, PD; Nielsen, MS; Nielsen, LB; Kwak, BR (2016) Sphingosine-1-phosphate reduces ischaemia-reperfusion injury by phosphorylating the gap junction protein Connexin43. *Cardiovasc Res* 109:385-396. doi:10.1093/cvr/cvw004
188. Sun, JH; Aponte, AM; Menazza, S; Gucek, M; Steenbergen, C; Murphy, E (2016) Additive cardioprotection by pharmacological postconditioning with hydrogen sulfide and nitric oxide donors in mouse heart: S-sulfhydration vs. S-nitrosylation. *Cardiovasc Res* 110:96-106. doi:10.1093/cvr/cvw037
189. Takada, S; Masaki, Y; Kinugawa, S; Matsumoto, J; Furihata, T; Mizushima, W; Kadoguchi, T; Fukushima, A; Homma, T; Takahashi, M; Harashima, S; Matsushima, S; Yokota, T; Tanaka, S; Okita, K; Tsutsui, H (2016) Dipeptidyl peptidase-4 inhibitor improved exercise capacity and mitochondrial biogenesis in mice with heart failure via activation of glucagon-like peptide-1 receptor signalling. *Cardiovasc Res* 111:338-347. doi:10.1093/cvr/cvw182
190. Valls-Lacalle, L; Barba, I; Miro-Casas, E; Alburquerque-Bejar, JJ; Ruiz-Meana, M; Fuertes-Agudo, M; Rodriguez-Sinovas, A; Garcia-Dorado, D (2016) Succinate dehydrogenase inhibition with malonate during reperfusion reduces infarct size by preventing mitochondrial permeability transition. *Cardiovasc Res* 109:374-384. doi:10.1093/cvr/cvv279
191. Alburquerque-Bejar, JJ; Barba, I; Valls-Lacalle, L; Ruiz-Meana, M; Pecoraro, M; Rodriguez-Sinovas, A; Garcia-Dorado, D (2017) Remote ischemic conditioning provides humoral cross-species cardioprotection through glycine receptor activation. *Cardiovasc Res* 113:52-60. doi:10.1093/cvr/cvw242
192. Bayoumi, AS; Teoh, JP; Aonuma, T; Yuan, ZZ; Ruan, XF; Tang, YL; Su, HB; Weintraub, NL; Kim, IM (2017) MicroRNA-532 protects the heart in acute myocardial infarction, and represses prss23, a positive regulator of endothelial-to-mesenchymal transition. *Cardiovasc Res* 113:1603-1614. doi:10.1093/cvr/cvx132
193. Bibli, SI; Zhou, ZM; Zukunft, S; Fisslthaler, B; Andreadou, I; Szabo, C; Brouckaert, P; Fleming, I; Papapetropoulos, A (2017) Tyrosine phosphorylation of eNOS regulates myocardial survival after an ischaemic insult: role of PYK2. *Cardiovasc Res* 113:926-937. doi:10.1093/cvr/cvx058
194. Chen, ZH; Xie, JH; Hao, HX; Lin, HR; Wang, L; Zhang, YX; Chen, L; Cao, SP; Huang, XB; Liao, WJ; Bin, JP; Liao, YL (2017) Ablation of periostin inhibits post-infarction myocardial regeneration in neonatal mice mediated by the phosphatidylinositol 3 kinase/glycogen synthase kinase 3 beta/cyclin D1 signalling pathway. *Cardiovasc Res* 113:620-632. doi:10.1093/cvr/cvx001
195. Garikipati, VNS; Verma, SK; Joladarashi, D; Cheng, ZJ; Ibeti, J; Cimini, M; Tang, Y; Khan, M; Yue, YJ; Benedict, C; Nickoloff, E; Truongcao, MM; Gao, EH; Krishnamurthy, P; Goukassian, DA; Koch, WJ; Kishore, R (2017) Therapeutic inhibition of miR-375 attenuates post-myocardial infarction inflammatory response and left ventricular dysfunction via PDK-1-AKT signalling axis. *Cardiovasc Res* 113:938-949. doi:10.1093/cvr/cvx052
196. Huang, CH; Liu, Y; Beenken, A; Jiang, L; Gao, X; Huang, ZF; Hsu, A; Gross, GJ; Wang, YG; Mohammadi, M; Schultz, JEJ (2017) A novel fibroblast growth factor-1 ligand with reduced heparin binding protects the heart against ischemia-reperfusion injury in the presence of heparin co-administration. *Cardiovasc Res* 113:1585-1602. doi:10.1093/cvr/cvx165
197. Poncelas, M; Inserte, J; Aluja, D; Hernando, V; Vilardosa, U; Garcia-Dorado, D (2017) Delayed, oral pharmacological inhibition of calpains attenuates adverse post-infarction remodelling. *Cardiovasc Res* 113:950-961. doi:10.1093/cvr/cvx073
198. Raleigh, JV; Mauro, AG; Devarakonda, T; Marchetti, C; He, J; Kim, E; Filippone, S; Das, A; Toldo, S; Abbate, A; Salloum, FN (2017) Reperfusion therapy with recombinant human relaxin-2

- (Serelaxin) attenuates myocardial infarct size and NLRP3 inflammasome following ischemia/reperfusion injury via eNOS-dependent mechanism. *Cardiovasc Res* 113:609-619. doi:10.1093/cvr/cvw246
199. Ribeiro-Rodrigues, TM; Laundos, TL; Pereira-Carvalho, R; Batista-Almeida, D; Pereira, R; Coelho-Santos, V; Silva, AP; Fernandes, R; Zuzarte, M; Enguita, FJ; Costa, MC; Pinto-do-O, P; Pinto, MT; Gouveia, P; Ferreira, L; Mason, JC; Pereira, P; Kwak, BR; Nascimento, DS; Girao, H (2017) Exosomes secreted by cardiomyocytes subjected to ischaemia promote cardiac angiogenesis. *Cardiovasc Res* 113:1338-1350. doi:10.1093/cvr/cvx118
200. Vincent, A; Sportouch, C; Covinhes, A; Barrere, C; Gallot, L; Delgado-Betancourt, V; Lattuca, B; Solecki, K; Boisguerin, P; Piot, C; Nargeot, J; Barrere-Lemaire, S (2017) Cardiac mGluR1 metabotropic receptors in cardioprotection. *Cardiovasc Res* 113:644-655. doi:10.1093/cvr/cvx024
201. Wang, YM; Jin, L; Song, Y; Zhang, M; Shan, D; Liu, YL; Fang, M; Lv, FX; Xiao, RP; Zhang, Y (2017) beta-arrestin 2 mediates cardiac ischemia-reperfusion injury via inhibiting GPCR-independent cell survival signalling. *Cardiovasc Res* 113:1615-1626. doi:10.1093/cvr/cvx147
202. Wang, ZH; Huang, SY; Sheng, YL; Peng, X; Liu, H; Jin, N; Cai, J; Shu, YW; Li, T; Li, P; Fan, C; Hu, XF; Zhang, WY; Long, R; You, Y; Huang, CH; Song, Y; Xiang, CH; Wang, J; Yang, Y; Liu, K (2017) Topiramate modulates post-infarction inflammation primarily by targeting monocytes or macrophages. *Cardiovasc Res* 113:475-487. doi:10.1093/cvr/cvx027
203. Barile, L; Cervio, E; Lionetti, V; Milano, G; Ciullo, A; Biemmi, V; Bolis, S; Altomare, C; Matteucci, M; Di Silvestre, D; Brambilla, F; Fertig, TE; Torre, T; Demertzis, S; Mauri, P; Moccetti, T; Vassalli, G (2018) Cardioprotection by cardiac progenitor cell-secreted exosomes: role of pregnancy-associated plasma protein-A. *Cardiovasc Res* 114:992-1005. doi:10.1093/cvr/cvy055
204. Chen, CW; Wang, LL; Zaman, S; Gordon, J; Arisi, MF; Venkataraman, CM; Chung, JJ; Hung, G; Gaffey, AC; Spruce, LA; Fazelinia, H; Gorman, RC; Seeholzer, SH; Burdick, JA; Atluri, P (2018) Sustained release of endothelial progenitor cell-derived extracellular vesicles from shear-thinning hydrogels improves angiogenesis and promotes function after myocardial infarction. *Cardiovasc Res* 114:1029-1040. doi:10.1093/cvr/cvy067
205. Chen, H; Jing, XY; Shen, YJ; Wang, TL; Ou, C; Lu, SF; Cai, Y; Li, Q; Chen, X; Ding, YJ; Yu, XC; Zhu, BM (2018) Stat5-dependent cardioprotection in late remote ischaemia preconditioning. *Cardiovasc Res* 114:679-689. doi:10.1093/cvr/cvy014
206. Deutsch, MA; Doppler, SA; Li, XH; Lahm, H; Santamaria, G; Cuda, G; Eichhorn, S; Ratschiller, T; Dzilic, E; Dressen, M; Eckart, A; Stark, K; Massberg, S; Bartets, A; Rischpter, C; Gilsbach, R; Hein, L; Fleischmann, BK; Wu, SM; Lange, R; Krane, M (2018) Reactivation of the Nkx2.5 cardiac enhancer after myocardial infarction does not presage myogenesis. *Cardiovasc Res* 114:1098-1114. doi:10.1093/cvr/cvy069
207. Ding, ZF; Wang, XW; Liu, SJ; Shahanawaz, J; Theus, S; Fan, YB; Deng, XY; Zhou, SC; Mehta, JL (2018) PCSK9 expression in the ischaemic heart and its relationship to infarct size, cardiac function, and development of autophagy. *Cardiovasc Res* 114:1738-1751. doi:10.1093/cvr/cvy128
208. Francois, AA; Obasanjo-Blackshire, K; Clark, JE; Boguslavskyi, A; Holt, MR; Parker, PJ; Marber, MS; Heads, RJ (2018) Loss of Protein Kinase Novel 1 (PKN1) is associated with mild systolic and diastolic contractile dysfunction, increased phospholamban Thr 17 phosphorylation, and exacerbated ischaemia-reperfusion injury. *Cardiovasc Res* 114:138-157. doi:10.1093/cvr/cvx206
209. Frankenreiter, S; Groneberg, D; Kuret, A; Krieg, T; Ruth, P; Friebe, A; Lukowski, R (2018) Cardioprotection by ischemic postconditioning and cyclic guanosine monophosphate-elevating agents involves cardiomyocyte nitric oxide-sensitive guanylyl cyclase. *Cardiovasc Res* 114:822-829. doi:10.1093/cvr/cvy039
210. Ueta, CB; Campos, JC; Albuquerque, RPE; Lima, VM; Disatnik, MH; Sanchez, AB; Chen, CH; de Medeiros, MHG; Yang, WJ; Mochly-Rosen, D; Ferreira, JCB (2018) Cardioprotection induced by a brief exposure to acetaldehyde: role of aldehyde dehydrogenase 2. *Cardiovasc Res* 114:1006-1015. doi:10.1093/cvr/cvy070
211. Vilahur, G; Gutierrez, M; Casani, L; Lambert, C; Mendieta, G; Ben-Aicha, S; Capdevila, A; Pons-Llado, G; Carreras, F; Carlsson, L; Hidalgo, A; Badimon, L (2018) P2Y(12) antagonists and cardiac repair post-myocardial infarction: global and regional heart function analysis and molecular assessments in pigs. *Cardiovasc Res* 114:1860-1870. doi:10.1093/cvr/cvy201

212. Wang, L; Quan, NH; Sun, WQ; Chen, X; Cates, C; Rousselle, T; Zhou, XC; Zhao, XZ; Li, J (2018) Cardiomyocyte-specific deletion of Sirt1 gene sensitizes myocardium to ischaemia and reperfusion injury. *Cardiovasc Res* 114:805-821. doi:10.1093/cvr/cvy033
213. Whittington, HJ; Ostrowski, PJ; McAndrew, DJ; Cao, F; Shaw, A; Eykyn, TR; Lake, HA; Tyler, J; Schneider, JE; Neubauer, S; Zervou, S; Lygate, CA (2018) Over-expression of mitochondrial creatine kinase in the murine heart improves functional recovery and protects against injury following ischaemia-reperfusion. *Cardiovasc Res* 114:858-869. doi:10.1093/cvr/cvy054
214. Xia, YL; Zhang, FY; Zhao, SH; Li, YY; Chen, XY; Gao, EH; Xu, XY; Xiong, ZY; Zhang, XM; Zhang, JL; Zhao, HS; Wang, W; Wang, HL; Guo, YJ; Liu, Y; Li, CY; Wang, S; Zhang, L; Yan, WJ; Tao, L (2018) Adiponectin determines farnesoid X receptor agonism-mediated cardioprotection against post-infarction remodelling and dysfunction. *Cardiovasc Res* 114:1335-1349. doi:10.1093/cvr/cvy093
215. Ziegler, KA; Ahles, A; Wille, T; Kerler, J; Ramanujam, D; Engelhardt, S (2018) Local sympathetic denervation attenuates myocardial inflammation and improves cardiac function after myocardial infarction in mice. *Cardiovasc Res* 114:291-299. doi:10.1093/cvr/cvx227
216. Bibli, SI; Papapetropoulos, A; Iliodromitis, EK; Daiber, A; Randriamboavonjy, V; Steven, S; Brouckaert, P; Chatzianastasiou, A; Kypreos, KE; Hausenloy, DJ; Fleming, I; Andreadou, I (2019) Nitroglycerine limits infarct size through S-nitrosation of cyclophilin D: a novel mechanism for an old drug. *Cardiovasc Res* 115:625-636. doi:10.1093/cvr/cvy222
217. Chen, XY; Zhabyeyev, P; Azad, AK; Wang, W; Minerath, RA; DesAulniers, E; Grueter, CE; Murray, AG; Kassiri, Z; Vanhaesebroeck, B; Oudit, GY (2019) Endothelial and cardiomyocyte PI3K beta divergently regulate cardiac remodelling in response to ischaemic injury. *Cardiovasc Res* 115:1343-1356. doi:10.1093/cvr/cvy298
218. Fujiwara, M; Matoba, T; Koga, JI; Okahara, A; Funamoto, D; Nakano, K; Tsutsui, H; Egashira, K (2019) Nanoparticle incorporating Toll-like receptor 4 inhibitor attenuates myocardial ischaemia-reperfusion injury by inhibiting monocyte-mediated inflammation in mice. *Cardiovasc Res* 115:1244-1255. doi:10.1093/cvr/cvz066
219. Jones, JL; Peana, D; Veteto, AB; Lambert, MD; Nourian, Z; Karasseva, NG; Hill, MA; Lindman, BR; Baines, CP; Krenz, M; Domeier, TL (2019) TRPV4 increases cardiomyocyte calcium cycling and contractility yet contributes to damage in the aged heart following hypoosmotic stress. *Cardiovasc Res* 115:46-56. doi:10.1093/cvr/cvy156
220. Kimura, T; Tajiri, K; Sato, A; Sakai, S; Wang, Z; Yoshida, T; Uede, T; Hiroe, M; Aonuma, K; Ieda, M; Imanaka-Yoshida, K (2019) Tenascin-C accelerates adverse ventricular remodelling after myocardial infarction by modulating macrophage polarization. *Cardiovasc Res* 115:614-624. doi:10.1093/cvr/cvy244
221. Laudette, M; Coluccia, A; Sainte-Marie, Y; Solari, A; Fazal, L; Sicard, P; Silvestri, R; Mialet-Perez, J; Pons, S; Ghaleh, B; Blondeau, JP; Lezoualc'h, F (2019) Identification of a pharmacological inhibitor of Epac1 that protects the heart against acute and chronic models of cardiac stress. *Cardiovasc Res* 115:1766-1777. doi:10.1093/cvr/cvz076
222. Li, Z; Agrawal, V; Ramratnam, M; Sharma, RK; D'Auria, S; Sincoular, A; Jakubiak, M; Music, ML; Kutschke, WJ; Huang, XN; Gifford, L; Ahmad, F (2019) Cardiac sodium-dependent glucose cotransporter 1 is a novel mediator of ischaemia/reperfusion injury. *Cardiovasc Res* 115:1646-1658. doi:10.1093/cvr/cvz037
223. Lindsey, ML; Jung, M; Yabluchanskiy, A; Cannon, PL; Iyer, RP; Flynn, ER; DeLeon-Pennell, KY; Valerio, FM; Harrison, CL; Ripplinger, CM; Hall, ME; Ma, YG (2019) Exogenous CXCL4 infusion inhibits macrophage phagocytosis by limiting CD36 signalling to enhance post-myocardial infarction cardiac dilation and mortality. *Cardiovasc Res* 115:395-408. doi:10.1093/cvr/cvy211
224. Liu, YN; Paterson, M; Baumgardt, SL; Irwin, MG; Xia, ZY; Bosnjak, ZJ; Ge, ZD (2019) Vascular endothelial growth factor regulation of endothelial nitric oxide synthase phosphorylation is involved in isoflurane cardiac preconditioning. *Cardiovasc Res* 115:168-178. doi:10.1093/cvr/cvy157
225. Luo, H; Li, XH; Li, TZM; Zhao, L; He, JN; Zha, LH; Qi, QQ; Yu, ZX (2019) microRNA-423-3p exosomes derived from cardiac fibroblasts mediates the cardioprotective effects of ischaemic post-conditioning. *Cardiovasc Res* 115:1189-1204. doi:10.1093/cvr/cvy231
226. Matsumoto, K; Obana, M; Kobayashi, A; Kihara, M; Shioi, G; Miyagawa, S; Maeda, M; Sakata, Y; Nakayama, H; Sawa, Y; Fujio, Y (2019) Blockade of NKG2D/NKG2D ligand interaction attenuated

cardiac remodelling after myocardial infarction. *Cardiovasc Res* 115:765-775.  
doi:10.1093/cvr/cvy254

227. Nikolaou, PE; Boengler, K; Efentakis, P; Vouvgiannopoulou, K; Zoga, A; Gaboriaud-Kolar, N; Myrianthopoulos, V; Alexakos, P; Kostomitsopoulos, N; Rerras, I; Tsantili-Kakoulidou, A; Skaltsounis, AL; Papapetropoulos, A; Iliodromitis, EK; Schulz, R; Andreadou, I (2019) Investigating and re-evaluating the role of glycogen synthase kinase 3 beta kinase as a molecular target for cardioprotection by using novel pharmacological inhibitors. *Cardiovasc Res* 115:1228-1243.  
doi:10.1093/cvr/cvz061

228. Schloss, MJ; Horckmans, M; Guillamat-Prats, R; Hering, D; Lauer, E; Lenglet, S; Weber, C; Thomas, A; Steffens, S (2019) 2-Arachidonoylglycerol mobilizes myeloid cells and worsens heart function after acute myocardial infarction. *Cardiovasc Res* 115:602-613. doi:10.1093/cvr/cvy242

229. Surinkaew, S; Aflaki, M; Takawale, A; Chen, Y; Qi, XY; Gillis, MA; Shi, YF; Tardif, JC; Chattipakorn, N; Nattel, S (2019) Exchange protein activated by cyclic-adeNOSine monophosphate (Epac) regulates atrial fibroblast function and controls cardiac remodelling. *Cardiovasc Res* 115:94-106. doi:10.1093/cvr/cvy173

230. Tokutome, M; Matoba, T; Nakano, Y; Okahara, A; Fujiwara, M; Koga, JI; Nakano, K; Tsutsui, H; Egashira, K (2019) Peroxisome proliferator-activated receptor-gamma targeting nanomedicine promotes cardiac healing after acute myocardial infarction by skewing monocyte/macrophage polarization in preclinical animal models. *Cardiovasc Res* 115:419-431. doi:10.1093/cvr/cvy200

231. Uthman, L; Nederlof, R; Eerbeek, O; Baartscheer, A; Schumacher, C; Buchholtz, N; Hollmann, MW; Coronel, R; Weber, NC; Zuurbier, CJ (2019) Delayed ischaemic contracture onset by empagliflozin associates with NHE1 inhibition and is dependent on insulin in isolated mouse hearts. *Cardiovasc Res* 115:1533-1545. doi:10.1093/cvr/cvz004

232. Valverde, CA; Mazzocchi, G; Di Carlo, MN; Pardo, AC; Salas, N; Ragone, MI; Felice, JI; Cely-Ortiz, A; Consolini, AE; Portiansky, E; Mosca, S; Kranias, EG; Wehrens, XHT; Mattiazzi, A (2019) Ablation of phosphotamban rescues reperfusion arrhythmias but exacerbates myocardium infarction in hearts with Ca<sup>2+</sup>/calmodulin kinase II constitutive phosphorylation of ryanodine receptors. *Cardiovasc Res* 115:556-569. doi:10.1093/cvr/cvy213

233. Wang, YN; Liu, JL; Kong, QY; Cheng, H; Tu, F; Yu, P; Liu, Y; Zhang, XJ; Li, CF; Li, YH; Min, XX; Du, SY; Ding, ZN; Liu, L (2019) Cardiomyocyte-specific deficiency of HSPB1 worsens cardiac dysfunction by activating NFB-mediated leucocyte recruitment after myocardial infarction. *Cardiovasc Res* 115:154-167. doi:10.1093/cvr/cvy163

234. Yeang, C; Hasanally, D; Que, XC; Hung, MY; Stamenkovic, A; Chan, D; Chaudhary, R; Margulets, V; Edell, AL; Hoshijima, M; Gu, YS; Bradford, W; Dalton, N; Miu, P; Cheung, DY; Jassal, DS; Pierce, GN; Peterson, KL; Kirshenbaum, LA; Witztum, JL; Tsimikas, S; Ravandi, A (2019) Reduction of myocardial ischaemia-reperfusion injury by inactivating oxidized phospholipids. *Cardiovasc Res* 115:179-189. doi:10.1093/cvr/cvy136

235. Zhao, JX; Li, XL; Hu, JX; Chen, F; Qiao, SH; Sun, X; Gao, L; Xie, J; Xu, B (2019) Mesenchymal stromal cell-derived exosomes attenuate myocardial ischaemia-reperfusion injury through miR-182-regulated macrophage polarization. *Cardiovasc Res* 115:1205-1216. doi:10.1093/cvr/cvz040

236. Boisguerin, P; Covinhes, A; Gallot, L; Barrere, C; Vincent, A; Busson, M; Piot, C; Nargeot, J; Lebleu, B; Barrere-Lemaire, S (2020) A novel therapeutic peptide targeting myocardial reperfusion injury. *Cardiovasc Res* 116:633-644. doi:10.1093/cvr/cvz145

237. Gao, C; Wang, RT; Li, B; Guo, YZ; Yin, T; Xia, YL; Zhang, FY; Lian, K; Liu, Y; Wang, H; Zhang, L; Gao, EH; Yan, WJ; Tao, L (2020) TXNIP/Redd1 signalling and excessive autophagy: a novel mechanism of myocardial ischaemia/reperfusion injury in mice. *Cardiovasc Res* 116:645-657. doi:10.1093/cvr/cvz152

238. Huang, PS; Wang, L; Li, Q; Tian, XQ; Xu, J; Xu, JY; Xiong, YY; Chen, GH; Qian, HY; Jin, C; Yu, Y; Cheng, K; Qian, L; Yang, YJ (2020) Atorvastatin enhances the therapeutic efficacy of mesenchymal stem cells-derived exosomes in acute myocardial infarction via up-regulating long non-coding RNA H19. *Cardiovasc Res* 116:353-367. doi:10.1093/cvr/cvz139

239. Lou, X; Zhao, M; Fan, CM; Fast, VG; Valarmathi, MT; Zhu, WQ; Zhang, JY (2020) N-cadherin overexpression enhances the reparative potency of human-induced pluripotent stem cell-derived cardiac myocytes in infarcted mouse hearts. *Cardiovasc Res* 116:671-685. doi:10.1093/cvr/cvz179

240. Nguyen, QT; Nsaibia, MJ; Sirois, MG; Calderone, A; Tardif, JC; Shi, YF; Ruiz, M; Daneault, C; Gagnon, L; Grouix, B; Laurin, P; Dupuis, J (2020) PBI-4050 reduces pulmonary hypertension, lung

- fibrosis, and right ventricular dysfunction in heart failure. *Cardiovasc Res* 116:171-182. doi:10.1093/cvr/cvz034
241. Samidurai, A; Roh, SK; Prakash, M; Durrant, D; Salloum, FN; Kukreja, RC; Das, A (2020) STAT3-miR-17/20 signalling axis plays a critical role in attenuating myocardial infarction following rapamycin treatment in diabetic mice. *Cardiovasc Res* 116:2103-2115. doi:10.1093/cvr/cvz315
242. Schwach, V; Fernandes, MG; Maas, S; Gerhardt, S; Tsonaka, R; van der Weerd, L; Passier, R; Mummery, CL; Birket, MJ; Salvatori, DCF (2020) Expandable human cardiovascular progenitors from stem cells for regenerating mouse heart after myocardial infarction. *Cardiovasc Res* 116:545-553. doi:10.1093/cvr/cvz181
243. Yang, CF; Chen, YY; Singh, JP; Hsu, SF; Liu, YW; Yang, CY; Chang, CW; Chen, SN; Shih, RH; Hsu, ST; Jou, YS; Cheng, CF; Meng, TC (2020) Targeting protein tyrosine phosphatase PTP-PEST (PTPN12) for therapeutic intervention in acute myocardial infarction. *Cardiovasc Res* 116:1032-1046. doi:10.1093/cvr/cvz165
244. Amanakis, G; Sun, JH; Fergusson, MM; McGinty, S; Liu, CY; Molkenkin, JD; Murphy, E (2021) Cysteine 202 of cyclophilin D is a site of multiple post-translational modifications and plays a role in cardioprotection. *Cardiovasc Res* 117:212-223. doi:10.1093/cvr/cvaa053
245. Kompa, AR; Greening, DW; Kong, AM; McMillan, PJ; Fang, HY; Saxena, R; Wong, RCB; Lees, JG; Sivakumaran, P; Newcomb, AE; Tannous, BA; Kos, C; Mariana, L; Loudovaris, T; Hausenloy, DJ; Lim, SY (2021) Sustained subcutaneous delivery of secretome of human cardiac stem cells promotes cardiac repair following myocardial infarction. *Cardiovasc Res* 117:918-929. doi:10.1093/cvr/cvaa088
246. Kuang, YS; Li, XL; Liu, XX; Wei, L; Chen, XL; Liu, J; Zhuang, T; Pi, JJ; Wang, YF; Zhu, CY; Gong, X; Hu, H; Yu, ZR; Li, JM; Yu, P; Fan, HM; Zhang, YZ; Liu, ZM; Zhang, L (2021) Vascular endothelial S1pr1 ameliorates adverse cardiac remodelling via stimulating reparative macrophage proliferation after myocardial infarction. *Cardiovasc Res* 117:585-599. doi:10.1093/cvr/cvaa046
247. Nambu, H; Takada, S; Maekawa, S; Matsumoto, J; Kakutani, N; Furihata, T; Shirakawa, R; Katayama, T; Nakajima, T; Yamanashi, K; Obata, Y; Nakano, I; Tsuda, M; Saito, A; Fukushima, A; Yokota, T; Nio-Kobayashi, J; Yasui, H; Higashikawa, K; Kuge, Y; Anzai, T; Sabe, H; Kinugawa, S (2021) Inhibition of xanthine oxidase in the acute phase of myocardial infarction prevents skeletal muscle abnormalities and exercise intolerance. *Cardiovasc Res* 117:805-819. doi:10.1093/cvr/cvaa127
248. Tao, ZH; Loo, SJ; Su, LP; Tan, SH; Tee, GZ; Gan, SU; Zhang, JY; Chen, X; Ye, L (2021) Angiopoietin-1 enhanced myocytemitosis, engraftment, and the reparability of hiPSC-CMs for treatment of myocardial infarction. *Cardiovasc Res* 117:1578-1591. doi:10.1093/cvr/cvaa215
249. Ambrosini, S; Montecucco, F; Kolijn, D; Pedicino, D; Akhmedov, A; Mohammed, SA; Herwig, M; Gorica, E; Szabo, PL; Weber, L; Russo, G; Vinci, R; Matter, CM; Liuzzo, G; Brown, PJ; Rossi, FMV; Camici, GG; Sciarretta, S; Beltrami, AP; Crea, F; Podesser, B; Luscher, TF; Kiss, A; Ruschitzka, F; Hamdani, N; Costantino, S; Paneni, F (2022) Methylation of the Hippo effector YAP by the methyltransferase SETD7 drives myocardial ischaemic injury: a translational study. *Cardiovasc Res* 118:3374-3385. doi:10.1093/cvr/cvac102
250. de Lucia, C; Grisanti, LA; Borghetti, G; Piedepalumbo, M; Ibeti, J; Lucchese, AM; Barr, EW; Roy, R; Okyere, AD; Murphy, HC; Gao, E; Rengo, G; Houser, SR; Tilley, DG; Koch, WJ (2022) G protein-coupled receptor kinase 5 (GRK5) contributes to impaired cardiac function and immune cell recruitment in post-ischemic heart failure. *Cardiovasc Res* 118:169-183. doi:10.1093/cvr/cvab044
251. Dehghani, T; Thai, PN; Sodhi, H; Ren, L; Sirish, P; Nader, CE; Timofeyev, V; Overton, JL; Li, XC; Lam, KS; Chiamvimonvat, N; Panitch, A (2022) Selectin-targeting glycosaminoglycan-peptide conjugate limits neutrophil-mediated cardiac reperfusion injury. *Cardiovasc Res* 118:267-281. doi:10.1093/cvr/cvaa312
252. del Campo, CV; Liaw, NY; Gunadasa-Rohling, M; Matthaei, M; Braga, L; Kennedy, T; Salinas, G; Voigt, N; Giacca, M; Zimmermann, WH; Riley, PR (2022) Regenerative potential of epicardium-derived extracellular vesicles mediated by conserved miRNA transfer. *Cardiovasc Res* 118:597-611. doi:10.1093/cvr/cvab054
253. Harris, M; Sun, JH; Keeran, K; Aponte, A; Singh, K; Springer, D; Gucek, M; Pirooznia, M; Cockman, ME; Murphy, E; Kennedy, LM (2022) Ogfod1 deletion increases cardiac beta-alanine levels and protects mice against ischaemia- reperfusion injury. *Cardiovasc Res* 118:2847-2858. doi:10.1093/cvr/cvab323

254. He, WH; McCarroll, CS; Nather, K; Ford, K; Mangion, K; Riddell, A; O'Toole, D; Zaeri, A; Corcoran, D; Carrick, D; Lee, MMY; McEntegart, M; Davie, A; Good, R; Lindsay, MM; Eteiba, H; Rocchiccioli, P; Watkins, S; Hood, S; Shaukat, A; McArthur, L; Elliott, EB; McClure, J; Hawksby, C; Martin, T; Petrie, MC; Oldroyd, KG; Smith, GL; Channon, KM; Berry, C; Nicklin, SA; Loughrey, CM (2022) Inhibition of myocardial cathepsin-L release during reperfusion following myocardial infarction improves cardiac function and reduces infarct size. *Cardiovasc Res* 118:1535-1547. doi:10.1093/cvr/cvab204
255. Hubert, F; Payan, SM; Pelce, E; Bouchard, L; Sturny, R; Lenfant, N; Mottola, G; Collart, F; Kelly, RG; Rochais, F (2022) FGF10 promotes cardiac repair through a dual cellular mechanism increasing cardiomyocyte renewal and inhibiting fibrosis. *Cardiovasc Res* 118:2625-2637. doi:10.1093/cvr/cvab340
256. Kalkhoran, SB; Kriston-Vizi, J; Hernandez-Resendiz, S; Crespo-Avilan, GE; Rosdah, AA; Lees, JG; Da Costa, JRS; Ling, NXY; Holien, JK; Samangouei, P; Chinda, K; Yap, EP; Riquelme, JA; Ketteler, R; Yellon, DM; Lim, SY; Hausenloy, DJ (2022) Hydralazine protects the heart against acute ischaemia/reperfusion injury by inhibiting Drp1-mediated mitochondrial fission. *Cardiovasc Res* 118:282-294. doi:10.1093/cvr/cvaa343
257. Mia, MM; Cibi, DM; Ghani, SABA; Singh, A; Tee, N; Sivakumar, V; Bogireddi, H; Cook, SA; Mao, JH; Singh, MK (2022) Loss of Yap/Taz in cardiac fibroblasts attenuates adverse remodelling and improves cardiac function. *Cardiovasc Res* 118:1785-1804. doi:10.1093/cvr/cvab205
258. Shah, M; He, ZH; Rauf, A; Kalkhoran, SB; Heiestad, CM; Stenslokken, KO; Parish, CR; Soehnlein, O; Arjun, S; Davidson, SM; Yellon, D (2022) Extracellular histones are a target in myocardial ischaemia-reperfusion injury. *Cardiovasc Res* 118:1115-1125. doi:10.1093/cvr/cvab139
259. Xu, JY; Xiong, YY; Tang, RJ; Jiang, WY; Ning, Y; Gong, ZT; Huang, PS; Chen, GH; Xu, J; Wu, CX; Hu, MJ; Xu, J; Xu, Y; Huang, CR; Jin, C; Lu, XT; Qian, HY; Li, XD; Yang, YJ (2022) Interleukin-5-induced eosinophil population improves cardiac function after myocardial infarction. *Cardiovasc Res* 118:2165-2178. doi:10.1093/cvr/cvab237
260. Akbar, N; Braithwaite, AT; Corr, EM; Koelwyn, GJ; van Solingen, C; Cochain, C; Saliba, AE; Corbin, A; Pezzolla, D; Jorgensen, MM; Baek, R; Edgar, L; De Villiers, C; Gunadasa-Rohling, M; Banerjee, A; Paget, D; Lee, C; Hogg, E; Costin, A; Dhaliwal, R; Johnson, E; Krausgruber, T; Riepsaame, J; Melling, GE; Shanmuganathan, M; Bock, C; Carter, DRF; Channon, KM; Riley, PR; Udalova, IA; Moore, KJ; Anthony, D; Choudhury, RP (2023) Rapid neutrophil mobilization by VCAM-1+endothelial cell-derived extracellular vesicles. *Cardiovasc Res* 119:236-251. doi:10.1093/cvr/cvac012
261. Berg, J; Jablonowski, R; Nordlund, D; Ryd, D; Heiberg, E; Carlsson, M; Arheden, H (2023) Mild hypothermia attenuates ischaemia/reperfusion injury: insights from serial non-invasive pressure-volume loops. *Cardiovasc Res* :2230-2243. doi:10.1093/cvr/cvad028
262. Chung, BM; Wang, Y; Thiel, M; Rostami, F; Rogoll, A; Hirsch, VG; Malik, Z; Bührke, A; Bär, C; Klintschar, M; Schmitto, JD; Vogt, C; Werlein, C; Jonigk, D; Bauersachs, J; Wollert, KC; Kempf, T (2023) Pre-emptive iron supplementation prevents myocardial iron deficiency and attenuates adverse remodelling after myocardial infarction. *Cardiovasc Res* 119:1969-1980. doi:10.1093/cvr/cvad092
263. Dong, M; Chen, DS; Zhu, YX; Yang, S; Kumar, S; Zhang, R; Zhou, Y; Yang, ZY; Zheng, N; Zhu, T; Xiang, JQ; Liu, Y; Kang, L; Liu, J (2023) Impaired regulation of MMP2/16-MLCK3 by miR-146a-5p increased susceptibility to myocardial ischaemic injury in aging mice. *Cardiovasc Res* 119:786-801. doi:10.1093/cvr/cvac104
264. Hiram, R; Xiong, F; Naud, P; Xiao, JN; Sosnowski, DK; Le Quilliec, E; Saljic, A; Abu-Taha, IH; Kamler, M; Leblanc, CA; Al-U'Datt, DGF; Sirois, MG; Hebert, TE; Tanguay, JF; Tardif, JC; Dobrev, D; Nattel, S (2023) An inflammation resolution-promoting intervention prevents atrial fibrillation caused by left ventricular dysfunction. *Cardiovasc Res* :- . doi:10.1093/cvr/cvad175
265. Kleinbongard, P; Lieder, H; Skyschally, A; Heusch, G (2023) No sex-related differences in infarct size, no-reflow, and protection by ischaemic pre-conditioning in Gottingen minipigs. *Cardiovasc Res* 119:561-570. doi:10.1093/cvr/cvac062
266. Kroetsch, JT; Lidington, D; Alibhai, FJ; Reitz, CJ; Zhang, HJ; Dinh, DD; Hanchard, J; Khatua, TN; Heximer, SP; Martino, TA; Bolz, SS (2023) Disrupting circadian control of peripheral myogenic reactivity mitigates cardiac injury following myocardial infarction. *Cardiovasc Res* 119:1403-1415. doi:10.1093/cvr/cvac174



267. Li, ZY; Dai, RL; Chen, M; Huang, LX; Zhu, K; Li, MY; Zhu, WT; Li, Y; Xie, N; Li, JC; Wang, L; Lan, F; Cao, CM (2023) p55 gamma degrades RIP3 via MG53 to suppress ischaemia-induced myocardial necroptosis and mediates cardioprotection of preconditioning. *Cardiovasc Res* :2421-2440. doi:10.1093/cvr/cvad123
268. Liu, TX; Meng, ZJ; Liu, J; Li, J; Zhang, YY; Deng, ZY; Luo, SY; Wang, MJ; Huang, Q; Zhang, SY; Fendt, P; Devouassoux, J; Li, DZ; McKenzie, ANJ; Nahrendorf, M; Libby, P; Guo, JL; Shi, GP (2023) Group 2 innate lymphoid cells protect mouse heart from myocardial infarction injury via interleukin 5, eosinophils, and dendritic cells. *Cardiovasc Res* 119:1046-1061. doi:10.1093/cvr/cvac144
269. Lou, X; Tang, YW; Ye, L; Pretorius, D; Fast, VG; Kahn-Krell, AM; Zhang, J; Zhang, JH; Qiao, AJ; Qin, GJ; Kamp, T; Thomson, JA; Zhang, JY (2023) Cardiac muscle patches containing four types of cardiac cells derived from human pluripotent stem cells improve recovery from cardiac injury in mice. *Cardiovasc Res* 119:1062-1076. doi:10.1093/cvr/cvad004
270. Rusiecka, OM; Molica, F; Nielsen, MS; Tollance, A; Morel, S; Frieden, M; Chanson, M; Boengler, K; Kwak, BR (2023) Mitochondrial pannexin1 controls cardiac sensitivity to ischaemia/reperfusion injury. *Cardiovasc Res* :2342-2354. doi:10.1093/cvr/cvad120
271. Sayour, NV; Brenner, GB; Makkos, A; Kiss, B; Kovacshazi, C; Gergely, TG; Aukrust, SG; Tian, HM; Zenkl, V; Gomori, K; Szabados, T; Bencsik, P; Heinen, A; Schulz, R; Baxter, GF; Zuurbier, CJ; Voko, Z; Ferdinandy, P; Giricz, Z (2023) Cardioprotective efficacy of limb remote ischaemic preconditioning in rats: discrepancy between a meta-analysis and a three-centre in vivo study. *Cardiovasc Res* 119:1336-1351. doi:10.1093/cvr/cvad024
272. Wang, XY; Gaur, M; Mounzih, K; Rodriguez, HJ; Qiu, HL; Chen, M; Yan, LQ; Cooper, BA; Narayan, S; Derakhshandeh, R; Rao, PA; Han, DD; Nabavizadeh, P; Springer, ML; John, CM (2023) Inhibition of galectin-3 post-infarction impedes progressive fibrosis by regulating inflammatory profibrotic cascades. *Cardiovasc Res* :2536-2549. doi:10.1093/cvr/cvad116
273. Zhao, JX; Zhang, Q; Cheng, W; Dai, Q; Wei, ZH; Guo, M; Chen, F; Qiao, SH; Hu, JX; Wang, JZ; Chen, HT; Bao, X; Mu, D; Sun, X; Xu, B; Xie, J (2023) Heart-gut microbiota communication determines the severity of cardiac injury after myocardial ischaemia/reperfusion. *Cardiovasc Res* 119:1390-1402. doi:10.1093/cvr/cvad023
274. Bonner, F; Borg, N; Jacoby, C; Temme, S; Ding, ZP; Flogel, U; Schrader, J (2013) Ecto-5-Nucleotidase on Immune Cells Protects From Adverse Cardiac Remodeling. *Circ Res* 113:301-312. doi:10.1161/CIRCRESAHA.113.300180
275. Duran, JM; Makarewich, CA; Sharp, TE; Starosta, T; Zhu, F; Hoffman, NE; Chiba, Y; Madesh, M; Berretta, RM; Kubo, H; Houser, SR (2013) Bone-Derived Stem Cells Repair the Heart After Myocardial Infarction Through Transdifferentiation and Paracrine Signaling Mechanisms. *Circ Res* 113:539-552. doi:10.1161/CIRCRESAHA.113.301202
276. Houtgraaf, JH; de Jong, R; Kazemi, K; de Groot, D; van der Spoel, TIG; Arslan, F; Hoefler, I; Pasterkamp, G; Itescu, S; Zijlstra, F; Geleijnse, ML; Serruys, PW; Duckers, HJ (2013) Intracoronary Infusion of Allogeneic Mesenchymal Precursor Cells Directly After Experimental Acute Myocardial Infarction Reduces Infarct Size, Abrogates Adverse Remodeling, and Improves Cardiac Function. *Circ Res* 113:153-166. doi:10.1161/CIRCRESAHA.112.300730
277. Icli, B; Wara, AKM; Moslehi, J; Sun, XH; Plovie, E; Cahill, M; Marchini, JF; Schissler, A; Padera, RF; Shi, JR; Cheng, HW; Raghuram, S; Arany, Z; Liao, R; Croce, K; MacRae, C; Feinberg, MW (2013) MicroRNA-26a Regulates Pathological and Physiological Angiogenesis by Targeting BMP/SMAD1 Signaling. *Circ Res* 113:1231-1241. doi:10.1161/CIRCRESAHA.113.301780
278. Lam, CK; Zhao, W; Cai, WF; Vafiadaki, E; Florea, SM; Ren, XP; Liu, Y; Robbins, N; Zhang, ZG; Zhou, XY; Jiang, M; Rubinstein, J; Jones, WK; Kranias, EG (2013) Novel Role of HAX-1 in Ischemic Injury Protection Involvement of Heat Shock Protein 90. *Circ Res* 112:79-89. doi:10.1161/CIRCRESAHA.112.279935
279. Ling, HY; Gray, CBB; Zambon, AC; Grimm, M; Gu, YS; Dalton, N; Purcell, NH; Peterson, K; Brown, JH (2013) Ca<sup>2+</sup>/Calmodulin-Dependent Protein Kinase II delta Mediates Myocardial Ischemia/Reperfusion Injury Through Nuclear Factor-kappa B. *Circ Res* 112:935-944. doi:10.1161/CIRCRESAHA.112.276915
280. Lygate, CA; Aksentijevic, D; Dawson, D; ten Hove, M; Phillips, D; de Bono, JP; Medway, DJ; Sebag-Montefiore, L; Hunyor, I; Channon, KM; Clarke, K; Zervou, S; Watkins, H; Balaban, RS; Neubauer, S (2013) Living Without Creatine Unchanged Exercise Capacity and Response to Chronic

Myocardial Infarction in Creatine-Deficient Mice. *Circ Res* 112:945-955.

doi:10.1161/CIRCRESAHA.112.300725

281. Ma, YG; Halade, GV; Zhang, JH; Ramirez, TA; Levin, D; Voorhees, A; Jin, YF; Han, HC; Manicone, AM; Lindsey, ML (2013) Matrix Metalloproteinase-28 Deletion Exacerbates Cardiac Dysfunction and Rupture After Myocardial Infarction in Mice by Inhibiting M2 Macrophage Activation. *Circ Res* 112:675-688. doi:10.1161/CIRCRESAHA.111.300502

282. Matsushima, S; Kuroda, J; Ago, T; Zhai, PY; Ikeda, Y; Oka, S; Fong, GH; Tian, R; Sadoshima, J (2013) Broad Suppression of NADPH Oxidase Activity Exacerbates Ischemia/Reperfusion Injury Through Inadvertent Downregulation of Hypoxia-inducible Factor-1 alpha and Upregulation of Peroxisome Proliferator-activated Receptor-alpha. *Circ Res* 112:1135-1149. doi:10.1161/CIRCRESAHA.111.300171

283. Sciarretta, S; Zhai, PY; Shao, D; Zablocki, D; Nagarajan, N; Terada, LS; Volpe, M; Sadoshima, J (2013) Activation of NADPH Oxidase 4 in the Endoplasmic Reticulum Promotes Cardiomyocyte Autophagy and Survival During Energy Stress Through the Protein Kinase RNA-Activated-Like Endoplasmic Reticulum Kinase/Eukaryotic Initiation Factor 2 alpha/Activating Transcription Factor 4 Pathway. *Circ Res* 113:1253-1264. doi:10.1161/CIRCRESAHA.113.301787

284. Alibhai, FJ; Tsimakouridze, EV; Chinnappareddy, N; Wright, DC; Billia, F; O'Sullivan, ML; Pyle, WG; Sole, MJ; Martino, TA (2014) Short-Term Disruption of Diurnal Rhythms After Murine Myocardial Infarction Adversely Affects Long-Term Myocardial Structure and Function. *Circ Res* 114:1713-1722. doi:10.1161/CIRCRESAHA.114.302995

285. Duran, JM; Makarewich, CA; Trapanese, D; Gross, P; Husain, S; Dunn, J; Lal, H; Sharp, TE; Starosta, T; Vagnozzi, RJ; Berretta, RM; Barbe, M; Yu, DH; Gao, E; Kubo, H; Force, T; Houser, SR (2014) Sorafenib Cardiotoxicity Increases Mortality After Myocardial Infarction. *Circ Res* 114:1700-1712. doi:10.1161/CIRCRESAHA.114.303200

286. Felician, G; Collesi, C; Lusic, M; Martinelli, V; Dal Ferro, M; Zentilin, L; Zacchigna, S; Giacca, M (2014) Epigenetic Modification at Notch Responsive Promoters Blunts Efficacy of Inducing Notch Pathway Reactivation After Myocardial Infarction. *Circ Res* 115:636-649. doi:10.1161/CIRCRESAHA.115.304517

287. Lin, ZQ; von Gise, A; Zhou, PZ; Gu, F; Ma, Q; Jiang, JM; Yau, AL; Buck, JN; Gouin, KA; van Gorp, PRR; Zhou, B; Chen, JH; Seidman, JG; Wang, DZ; Pu, WT (2014) Cardiac-Specific YAP Activation Improves Cardiac Function and Survival in an Experimental Murine MI Model. *Circ Res* 115:354-363. doi:10.1161/CIRCRESAHA.115.303632

288. Mishina, H; Watanabe, K; Tamaru, S; Watanabe, Y; Fujioka, D; Takahashi, S; Suzuki, K; Nakamura, T; Obata, J; Kawabata, K; Yokota, Y; Inoue, O; Murakami, M; Hanasaki, K; Kugiyama, K (2014) Lack of Phospholipase A(2) Receptor Increases Susceptibility to Cardiac Rupture After Myocardial Infarction. *Circ Res* 114:493-504. doi:10.1161/CIRCRESAHA.114.302319

289. Rainer, PP; Hao, S; Vanhoutte, D; Lee, DI; Koitabashi, N; Molkentin, JD; Kass, DA (2014) Cardiomyocyte-Specific Transforming Growth Factor Suppression Blocks Neutrophil Infiltration, Augments Multiple Cytoprotective Cascades, and Reduces Early Mortality After Myocardial Infarction. *Circ Res* 114:1246-1257. doi:10.1161/CIRCRESAHA.114.302653

290. Rassaf, T; Totzeck, M; Hendgen-Cotta, UB; Shiva, S; Heusch, G; Kelm, M (2014) Circulating Nitrite Contributes to Cardioprotection by Remote Ischemic Preconditioning. *Circ Res* 114:1601-1610. doi:10.1161/CIRCRESAHA.114.303822

291. Weirather, J; Hofmann, UD; Beyersdorf, N; Ramos, GC; Vogel, B; Frey, A; Ertl, G; Kerkau, T; Frantz, S (2014) Foxp(3+) CD4+ T Cells Improve Healing After Myocardial Infarction by Modulating Monocyte/Macrophage Differentiation. *Circ Res* 115:55-67. doi:10.1161/CIRCRESAHA.115.303895

292. Yan, XX; Hegab, AE; Endo, J; Anzai, A; Matsushashi, T; Katsumata, Y; Ito, K; Yamamoto, T; Betsuyaku, T; Shinmura, K; Shen, WF; Vivier, E; Fukuda, K; Sano, M (2014) Lung Natural Killer Cells Play a Major Counter-Regulatory Role in Pulmonary Vascular Hyperpermeability After Myocardial Infarction. *Circ Res* 114:637-649. doi:10.1161/CIRCRESAHA.114.302625

293. Yano, T; Ferlito, M; Aponte, A; Kuno, A; Miura, T; Murphy, E; Steenbergen, C (2014) Pivotal Role of mTORC2 and Involvement of Ribosomal Protein S6 in Cardioprotective Signaling. *Circ Res* 114:1268-1280. doi:10.1161/CIRCRESAHA.114.303562

294. Zavadzkas, JA; Stroud, RE; Bouges, S; Mukherjee, R; Jones, JR; Patel, RK; McDermott, PJ; Spinale, FG (2014) Targeted Overexpression of Tissue Inhibitor of Matrix Metalloproteinase-4

Modifies Post-Myocardial Infarction Remodeling in Mice. *Circ Res* 114:1435-1445.

doi:10.1161/CIRCRESAHA.114.303634

295. Avolio, E; Meloni, M; Spencer, HL; Riu, F; Katare, R; Mangialardi, G; Oikawa, A; Rodriguez-Arabaolaza, I; Dang, ZX; Mitchell, K; Reni, C; Alvino, VV; Rowlinson, J; Livi, U; Cesselli, D; Angelini, G; Emanuelli, C; Beltrami, AP; Madeddu, P (2015) Combined Intramyocardial Delivery of Human Pericytes and Cardiac Stem Cells Additively Improves the Healing of Mouse Infarcted Hearts Through Stimulation of Vascular and Muscular Repair. *Circ Res* 116:E81-E94.

doi:10.1161/CIRCRESAHA.115.306146

296. Conklin, DJ; Guo, YR; Jagatheesan, G; Kilfoil, PJ; Habertzettl, P; Hill, BG; Baba, SP; Guo, LP; Wetzelsberger, K; Obal, D; Rokosh, DG; Prough, RA; Prabhu, SD; Velayutham, M; Zweier, JL; Hoetker, JD; Riggs, DW; Srivastava, S; Bolli, R; Bhatnagar, A (2015) Genetic Deficiency of Glutathione S-Transferase P Increases Myocardial Sensitivity to Ischemia-Reperfusion Injury. *Circ Res* 117:437-449. doi:10.1161/CIRCRESAHA.114.305518

297. Ikeda, Y; Shirakabe, A; Maejima, Y; Zhai, PY; Sciarretta, S; Toli, J; Nomura, M; Mihara, K; Egashira, K; Ohishi, M; Abdellatif, M; Sadoshima, J (2015) Endogenous Drp1 Mediates Mitochondrial Autophagy and Protects the Heart Against Energy Stress. *Circ Res* 116:264-278.

doi:10.1161/CIRCRESAHA.116.303356

298. Jayawardena, TM; Finch, EA; Zhang, LN; Zhang, HT; Hodgkinson, CP; Pratt, RE; Rosenberg, PB; Mirotsov, M; Dzau, VJ (2015) MicroRNA Induced Cardiac Reprogramming In Vivo Evidence for Mature Cardiac Myocytes and Improved Cardiac Function. *Circ Res* 116:418-424.

doi:10.1161/CIRCRESAHA.116.304510

299. Jones, SP; Tang, XL; Guo, YR; Steenbergen, C; Lefer, DJ; Kukreja, RC; Kong, MY; Li, QH; Bhushan, S; Zhu, XP; Du, JJ; Nong, YB; Stowers, HL; Kondo, K; Hunt, GN; Goodchild, TT; Orr, A; Chang, CC; Ockaili, R; Salloum, FN; Bolli, R (2015) The NHLBI-Sponsored Consortium for preclinical assessment of cardioprotective Therapies (CAESAR) A New Paradigm for Rigorous, Accurate, and Reproducible Evaluation of Putative Infarct-Sparing Interventions in Mice, Rabbits, and Pigs. *Circ Res* 116:572-586. doi:10.1161/CIRCRESAHA.116.305462

300. Khan, M; Nickoloff, E; Abramova, T; Johnson, J; Verma, SK; Krishnamurthy, P; Mackie, AR; Vaughan, E; Garikipati, VNS; Benedict, C; Ramirez, V; Lambers, E; Ito, A; Gao, E; Misener, S; Luongo, T; Elrod, J; Qin, GJ; Houser, SR; Koch, WJ; Kishore, R (2015) Embryonic Stem Cell-Derived Exosomes Promote Endogenous Repair Mechanisms and Enhance Cardiac Function Following Myocardial Infarction. *Circ Res* 117:52-64. doi:10.1161/CIRCRESAHA.117.305990

301. Kim, PJ; Mahmoudi, M; Ge, XH; Matsuura, Y; Toma, I; Metzler, S; Kooreman, NG; Ramunas, J; Holbrook, C; McConnell, MV; Blau, H; Harnish, P; Rulifson, E; Yang, PC (2015) Direct Evaluation of Myocardial Viability and Stem Cell Engraftment Demonstrates Salvage of the Injured Myocardium. *Circ Res* 116:E40-E50. doi:10.1161/CIRCRESAHA.116.304668

302. Riegler, J; Tiburcy, M; Ebert, A; Tzatzalos, E; Raaz, U; Abilez, OJ; Shen, Q; Kooreman, NG; Neofytou, E; Chen, VC; Wang, M; Meyer, T; Tsao, PS; Connolly, AJ; Couture, LA; Gold, JD; Zimmermann, WH; Wu, JC (2015) Human Engineered Heart Muscles Engraft and Survive Long Term in a Rodent Myocardial Infarction Model. *Circ Res* 117:720-730.

doi:10.1161/CIRCRESAHA.115.306985

303. Skyschally, A; Gent, S; Amanakis, G; Schulte, C; Kleinbongard, P; Heusch, G (2015) Cross-Species Transfer of Protection by Remote Ischemic Preconditioning With Species-Specific Myocardial Signal Transduction by Reperfusion Injury Salvage Kinase and Survival Activating Factor Enhancement Pathways. *Circ Res* 117:279-288. doi:10.1161/CIRCRESAHA.117.306878

304. Van Aelst, LNL; Voss, S; Carai, P; Van Leeuwen, R; Vanhoutte, D; Sanders-van Wijk, S; Eurlings, L; Swinnen, M; Verheyen, FK; Verbeken, E; Nef, H; Troidl, C; Cook, SA; Brunner-La Rocca, HP; Mollmann, H; Papageorgiou, AP; Heymans, S (2015) Osteoglycin Prevents Cardiac Dilatation and Dysfunction After Myocardial Infarction Through Infarct Collagen Strengthening. *Circ Res* 116:425-436. doi:10.1161/CIRCRESAHA.116.304599

305. Yang, YF; Cheng, HW; Qiu, YL; Dupee, D; Noonan, M; Lin, YD; Fisch, S; Unno, K; Sereti, KI; Liao, RL (2015) MicroRNA-34a Plays a Key Role in Cardiac Repair and Regeneration Following Myocardial Infarction. *Circ Res* 117:450-459. doi:10.1161/CIRCRESAHA.117.305962

306. Zhu, M; Goetsch, SC; Wang, ZN; Luo, R; Hill, JA; Schneider, J; Morris, SM; Liu, ZP (2015) FoxO4 Promotes Early Inflammatory Response Upon Myocardial Infarction via Endothelial Arg1. *Circ Res* 117:967-977. doi:10.1161/CIRCRESAHA.115.306919

307. Chen, W; Spitzl, A; Mathes, D; Nikolaev, VO; Werner, F; Weirather, J; Spiranec, K; Rock, K; Fischer, JW; Kammerer, U; Stegner, D; Baba, HA; Hofmann, U; Frantz, S; Kuhn, M (2016) Endothelial Actions of ANP Enhance Myocardial Inflammatory Infiltration in the Early Phase After Acute Infarction. *Circ Res* 119:237-248. doi:10.1161/CIRCRESAHA.115.307196
308. Polhemus, DJ; Gao, J; Scarborough, AL; Trivedi, R; McDonough, KH; Goodchild, TT; Smart, F; Kapusta, DR; Lefer, DJ (2016) Radiofrequency Renal Denervation Protects the Ischemic Heart via Inhibition of GRK2 and Increased Nitric Oxide Signaling. *Circ Res* 119:470-480. doi:10.1161/CIRCRESAHA.115.308278
309. Tang, XL; Li, QH; Rokosh, G; Sanganalmath, SK; Chen, N; Ou, QH; Stowers, H; Hunt, G; Bolli, R (2016) Long-Term Outcome of Administration of c-kit(POS) Cardiac Progenitor Cells After Acute Myocardial Infarction Transplanted Cells Do not Become Cardiomyocytes, but Structural and Functional Improvement and Proliferation of Endogenous Cells Persist for at Least One Year. *Circ Res* 118:1091-1105. doi:10.1161/CIRCRESAHA.115.307647
310. Woodall, MC; Woodall, BP; Gao, EH; Yuan, A; Koch, WJ (2016) Cardiac Fibroblast GRK2 Deletion Enhances Contractility and Remodeling Following Ischemia/Reperfusion Injury. *Circ Res* 119:1116-1127. doi:10.1161/CIRCRESAHA.116.309538
311. Cao, Y; Bojjireddy, N; Kim, M; Li, T; Zhai, PY; Nagarajan, N; Sadoshima, J; Palmiter, RD; Tian, R (2017) Activation of gamma 2-AMPK Suppresses Ribosome Biogenesis and Protects Against Myocardial Ischemia/Reperfusion Injury. *Circ Res* 121:1182-1191. doi:10.1161/CIRCRESAHA.117.311159
312. DeBerge, M; Yeap, XY; Dehn, S; Zhang, S; Grigoryeva, L; Misener, S; Procissi, D; Zhou, X; Lee, DC; Muller, WA; Luo, XR; Rothlin, C; Tabas, I; Thorp, EB (2017) MerTK Cleavage on Resident Cardiac Macrophages Compromises Repair After Myocardial Ischemia Reperfusion Injury. *Circ Res* 121:930-940. doi:10.1161/CIRCRESAHA.117.311327
313. Fazal, L; Laudette, M; Paula-Gomes, S; Pons, S; Conte, C; Tortosa, F; Sicard, P; Sainte-Marie, Y; Bisselier, M; Lairez, O; Lucas, A; Roy, J; Ghaleh, B; Fauconnier, J; Mialet-Perez, J; Lezoualc'h, F (2017) Multifunctional Mitochondrial Epac1 Controls Myocardial Cell Death. *Circ Res* 120:645-657. doi:10.1161/CIRCRESAHA.116.309859
314. Fernandez-Jimenez, R; Galan-Arriola, C; Sanchez-Gonzalez, J; Agüero, J; Lopez-Martin, GJ; Gomez-Talavera, S; Garcia-Prieto, J; Benn, A; Molina-Iracheta, A; Barreiro-Perez, M; Martin-Garcia, A; Garcia-Lunar, I; Pizarro, G; Sanz, J; Sanchez, PL; Fuster, V; Ibanez, B (2017) Effect of Ischemia Duration and Protective Interventions on the Temporal Dynamics of Tissue Composition After Myocardial Infarction. *Circ Res* 121:439-450. doi:10.1161/CIRCRESAHA.117.310901
315. Gao, L; Kupfer, ME; Jung, JP; Yang, LB; Zhang, P; Sie, YD; Tran, Q; Ajeti, V; Freeman, BT; Fast, VG; Campagnola, PJ; Ogle, BM; Zhang, JY (2017) Myocardial Tissue Engineering With Cells Derived From Human-Induced Pluripotent Stem Cells and a Native-Like, High-Resolution, 3-Dimensionally Printed Scaffold. *Circ Res* 120:1318-1325. doi:10.1161/CIRCRESAHA.116.310277
316. Lesizza, P; Prosdocimo, G; Martinelli, V; Sinagra, G; Zacchigna, S; Giacca, M (2017) Single-Dose Intracardiac Injection of Pro-Regenerative MicroRNAs Improves Cardiac Function After Myocardial Infarction. *Circ Res* 120:1298-1304. doi:10.1161/CIRCRESAHA.116.309589
317. Luger, D; Lipinski, MJ; Westman, PC; Glover, DK; Dimastromatteo, J; Frias, JC; Albelda, MT; Sikora, S; Kharazi, A; Vertelov, G; Waksman, R; Epstein, SE (2017) Intravenously Delivered Mesenchymal Stem Cells Systemic Anti-Inflammatory Effects Improve Left Ventricular Dysfunction in Acute Myocardial Infarction and Ischemic Cardiomyopathy. *Circ Res* 120:1598-1613. doi:10.1161/CIRCRESAHA.117.310599
318. Luo, L; Tang, JN; Nishi, K; Yan, C; Dinh, PU; Cores, J; Kudo, T; Zhang, JY; Li, TS; Cheng, K (2017) Fabrication of Synthetic Mesenchymal Stem Cells for the Treatment of Acute Myocardial Infarction in Mice. *Circ Res* 120:1768-1775. doi:10.1161/CIRCRESAHA.116.310374
319. Sharp, TE; Schena, GJ; Hobby, AR; Starosta, T; Berretta, RM; Wallner, M; Borghetti, G; Gross, P; Yu, DH; Johnson, J; Feldsott, E; Trappanese, DM; Toib, A; Rabinowitz, JE; George, JC; Kubo, H; Mohsin, S; Houser, SR (2017) Cortical Bone Stem Cell Therapy Preserves Cardiac Structure and Function After Myocardial Infarction. *Circ Res* 121:1263-1278. doi:10.1161/CIRCRESAHA.117.311174
320. Su, SA; Yang, D; Wu, Y; Xie, Y; Zhu, W; Cai, ZJ; Shen, J; Fu, ZR; Wang, YP; Jia, LL; Wang, YD; Wang, JA; Xiang, MX (2017) EphrinB2 Regulates Cardiac Fibrosis Through Modulating the Interaction of Stat3 and TGF-beta/Smad3 Signaling. *Circ Res* 121:617-627. doi:10.1161/CIRCRESAHA.117.311045

321. Tachibana, A; Santoso, MR; Mahmoudi, M; Shukla, P; Wang, L; Bennett, M; Goldstone, AB; Wang, M; Fukushi, M; Ebert, AD; Woo, YJ; Rulifson, E; Yang, PC (2017) Paracrine Effects of the Pluripotent Stem Cell-Derived Cardiac Myocytes Salvage the Injured Myocardium. *Circ Res* 121:E22-E36. doi:10.1161/CIRCRESAHA.117.310803
322. Yan, XX; Zhang, H; Fan, Q; Hu, J; Tao, R; Chen, QJ; Iwakura, Y; Shen, WF; Lu, L; Zhang, Q; Zhang, RY (2017) Dectin-2 Deficiency Modulates Th1 Differentiation and Improves Wound Healing After Myocardial Infarction. *Circ Res* 120:1116-1129. doi:10.1161/CIRCRESAHA.116.310260
323. Casin, KM; Fallica, J; Mackowski, N; Veenema, RJ; Chan, A; St Paul, A; Zhu, GS; Bedja, D; Biswal, S; Kohr, MJ (2018) S-Nitrosoglutathione Reductase Is Essential for Protecting the Female Heart From Ischemia-Reperfusion Injury. *Circ Res* 123:1232-1243. doi:10.1161/CIRCRESAHA.118.313956
324. Kleinbongard, P; Amanakis, G; Skyschally, A; Heusch, G (2018) Reflection of Cardioprotection by Remote Ischemic Preconditioning in Attenuated ST-Segment Elevation During Ongoing Coronary Occlusion in Pigs Evidence for Cardioprotection From Ischemic Injury. *Circ Res* 122:1102-1108. doi:10.1161/CIRCRESAHA.118.312784
325. Lieder, HR; Kleinbongard, P; Skyschally, A; Hagelschuer, H; Chilian, WM; Heusch, G (2018) Vago-Splenic Axis in Signal Transduction of Remote Ischemic Preconditioning in Pigs and Rats. *Circ Res* 123:1152-1163. doi:10.1161/CIRCRESAHA.118.313859
326. Miyazaki, T; Otani, K; Chiba, A; Nishimura, H; Tokudome, T; Takano-Watanabe, H; Matsuo, A; Ishikawa, H; Shimamoto, K; Fukui, H; Kanai, Y; Yasoda, A; Ogata, S; Nishimura, K; Minamino, N; Mochizuki, N (2018) A New Secretory Peptide of Natriuretic Peptide Family, Osteocrin, Suppresses the Progression of Congestive Heart Failure After Myocardial Infarction. *Circ Res* 122:742-751. doi:10.1161/CIRCRESAHA.117.312624
327. Otaka, N; Shibata, R; Ohashi, K; Uemura, Y; Kambara, T; Enomoto, T; Ogawa, H; Ito, M; Kawanishi, H; Maruyama, S; Joki, Y; Fujikawa, Y; Narita, S; Unno, K; Kawamoto, Y; Murate, T; Murohara, T; Ouchi, N (2018) Myonectin Is an Exercise-Induced Myokine That Protects the Heart From Ischemia-Reperfusion Injury. *Circ Res* 123:1326-1338. doi:10.1161/CIRCRESAHA.118.313777
328. Techiryan, G; Weil, BR; Palka, BA; Cauty, JM (2018) Effect of Intracoronary Metformin on Myocardial Infarct Size in Swine. *Circ Res* 123:986-995. doi:10.1161/CIRCRESAHA.118.313341
329. Xiao, CC; Wang, K; Xu, YC; Hu, HX; Zhang, N; Wang, YC; Zhong, ZW; Zhao, J; Li, QJ; Zhu, D; Ke, CL; Zhong, SH; Wu, XP; Yu, H; Zhu, W; Chen, JH; Zhang, JY; Wang, JA; Hu, XY (2018) Transplanted Mesenchymal Stem Cells Reduce Autophagic Flux in Infarcted Hearts via the Exosomal Transfer of miR-125b. *Circ Res* 123:564-578. doi:10.1161/CIRCRESAHA.118.312758
330. Xu, SY; Tao, J; Yang, L; Zhang, E; Boriboun, C; Zhou, JL; Sun, TJ; Cheng, M; Huang, K; Shi, JW; Dong, NG; Liu, QH; Zhao, TC; Qiu, HY; Harris, RA; Chandel, NS; Losordo, DW; Qin, GJ (2018) E2F1 Suppresses Oxidative Metabolism and Endothelial Differentiation of Bone Marrow Progenitor Cells. *Circ Res* 122:701-711. doi:10.1161/CIRCRESAHA.117.311814
331. Yamada, Y; Wakao, S; Kushida, Y; Minatoguchi, S; Mikami, A; Higashi, K; Baba, S; Shigemoto, T; Kuroda, Y; Kanamori, H; Amin, M; Kawasaki, M; Nishigaki, K; Taoka, M; Isobe, T; Muramatsu, C; Dezawa, M; Minatoguchi, S (2018) S1P-S1PR2 Axis Mediates Homing of Muse Cells Into Damaged Heart for Long-Lasting Tissue Repair and Functional Recovery After Acute Myocardial Infarction. *Circ Res* 122:1069-1083. doi:10.1161/CIRCRESAHA.117.311648
332. Zhu, WQ; Zhao, M; Mattapally, S; Chen, SF; Zhang, JY (2018) CCND2 Overexpression Enhances the Regenerative Potency of Human Induced Pluripotent Stem Cell-Derived Cardiomyocytes: Remuscularization of Injured Ventricle. *Circ Res* 122:88-96. doi:10.1161/CIRCRESAHA.117.311504
333. Borden, A; Kurian, J; Nickoloff, E; Yang, YJ; Troupes, CD; Ibbett, J; Lucchese, AM; Gao, E; Mohsin, S; Koch, WJ; Houser, SR; Kishore, R; Khan, M (2019) Transient Introduction of miR-294 in the Heart Promotes Cardiomyocyte Cell Cycle Reentry After Injury. *Circ Res* 125:14-25. doi:10.1161/CIRCRESAHA.118.314223
334. Hou, ZX; Qin, XH; Hu, YY; Zhang, X; Li, GH; Wu, J; Li, J; Sha, JD; Chen, JW; Xia, JL; Wang, LF; Gao, F (2019) Longterm Exercise-Derived Exosomal miR-342-5p A Novel Exerkine for Cardioprotection. *Circ Res* 124:1386-1400. doi:10.1161/CIRCRESAHA.118.314635
335. Jia, DL; Jiang, H; Weng, XY; Wu, J; Bai, PY; Yang, WL; Wang, Z; Hu, K; Sun, AJ; Ge, JB (2019) Interleukin-35 Promotes Macrophage Survival and Improves Wound Healing After Myocardial Infarction in Mice. *Circ Res* 124:1323-1336. doi:10.1161/CIRCRESAHA.118.314569

336. Korf-Klingebiel, M; Reboll, MR; Grote, K; Schleiner, H; Wang, Y; Wu, XK; Klede, S; Mikhed, Y; Bauersachs, J; Klintschar, M; Rudat, C; Kispert, A; Niessen, HW; Luke, T; Dierks, T; Wollert, KC (2019) Heparan Sulfate-Editing Extracellular Sulfatases Enhance VEGF Bioavailability for Ischemic Heart Repair. *Circ Res* 125:787-801. doi:10.1161/CIRCRESAHA.119.315023
337. Petz, A; Grandoch, M; Gorski, DJ; Abrams, M; Piroth, M; Schneckmann, R; Homann, S; Muller, J; Hartwig, S; Lehr, S; Yamaguchi, Y; Wight, TN; Gorressen, S; Ding, ZP; Kotter, S; Kruger, M; Heinen, A; Kelm, M; Godecke, A; Fogel, U; Fischer, JW (2019) Cardiac Hyaluronan Synthesis Is Critically Involved in the Cardiac Macrophage Response and Promotes Healing After Ischemia Reperfusion Injury. *Circ Res* 124:1433-1447. doi:10.1161/CIRCRESAHA.118.313285
338. Trincot, CE; Xu, WJ; Zhang, H; Kulikauskas, MR; Caranasos, TG; Jensen, BC; Sabine, A; Petrova, TV; Caron, KM (2019) Adrenomedullin Induces Cardiac Lymphangiogenesis After Myocardial Infarction and Regulates Cardiac Edema Via Connexin 43. *Circ Res* 124:101-113. doi:10.1161/CIRCRESAHA.118.313835
339. Zhao, L; Cheng, GM; Choksi, K; Samanta, A; Girgis, M; Soder, R; Vincent, RJ; Wulser, M; De Ruyter, M; McEnulty, P; Hauptman, J; Yang, YJ; Weiner, CP; Dawn, B (2019) Transplantation of Human Umbilical Cord Blood-Derived Cellular Fraction Improves Left Ventricular Function and Remodeling After Myocardial Ischemia/Reperfusion. *Circ Res* 125:759-772. doi:10.1161/CIRCRESAHA.119.315216
340. Gu, SS; Tan, JL; Li, Q; Liu, SY; Ma, J; Zheng, YJ; Liu, JL; Bi, W; Sha, P; Li, XX; Wei, M; Cao, N; Yang, HT (2020) Downregulation of LAPTM4B Contributes to the Impairment of the Autophagic Flux via Unopposed Activation of mTORC1 Signaling During Myocardial Ischemia/Reperfusion Injury. *Circ Res* 127:E148-E165. doi:10.1161/CIRCRESAHA.119.316388
341. Marinkovic, G; Koenis, DS; de Camp, L; Jablonowski, R; Graber, N; de Waard, V; de Vries, CJ; Goncalves, I; Nilsson, J; Jovinge, S; Schiopu, A (2020) S100A9 Links Inflammation and Repair in Myocardial Infarction. *Circ Res* 127:664-676. doi:10.1161/CIRCRESAHA.120.315865
342. Yan, WJ; Lin, C; Guo, YZ; Chen, YH; Du, YH; Lau, WB; Xia, YL; Zhang, FY; Su, RZ; Gao, EH; Wang, YJ; Li, CY; Liu, R; Ma, XL; Tao, L (2020) N-Cadherin Overexpression Mobilizes the Protective Effects of Mesenchymal Stromal Cells Against Ischemic Heart Injury Through a beta-Catenin-Dependent Manner. *Circ Res* 126:857-874. doi:10.1161/CIRCRESAHA.119.315806
343. Yue, YJ; Wang, CL; Benedict, C; Huang, GC; Truongcao, M; Roy, R; Cimini, M; Garikipati, VNS; Cheng, ZJ; Koch, WJ; Kishore, R (2020) Interleukin-10 Deficiency Alters Endothelial Progenitor Cell-Derived Exosome Reparative Effect on Myocardial Repair via Integrin-Linked Kinase Enrichment. *Circ Res* 126:315-329. doi:10.1161/CIRCRESAHA.119.315829
344. Burke, RM; Dirkx, RA; Quijada, P; Lighthouse, JK; Mohan, A; O'Brien, M; Wojciechowski, W; Woeller, CF; Phipps, RP; Alexis, JD; Ashton, JM; Small, EM (2021) Prevention of Fibrosis and Pathological Cardiac Remodeling by Salinomycin. *Circ Res* 128:1663-1678. doi:10.1161/CIRCRESAHA.120.317791
345. Gadi, I; Fatima, S; Elwakiel, A; Nazir, S; Al-Dabet, MM; Rana, R; Bock, F; Manoharan, J; Gupta, D; Biemann, R; Nieswandt, B; Braun-Dullaes, R; Besler, C; Scholz, M; Geffers, R; Griffin, JH; Esmon, CT; Kohli, S; Isermann, B; Shahzad, K (2021) Different DOACs Control Inflammation in Cardiac Ischemia-Reperfusion Differently. *Circ Res* 128:513-529. doi:10.1161/CIRCRESAHA.120.317219
346. Li, J; Salvador, AM; Li, GP; Valkov, N; Ziegler, O; Yeri, A; Xiao, CY; Meechoovet, B; Alsop, E; Rodosthenous, RS; Kundu, P; Huan, TX; Levy, D; Tigges, J; Pico, AR; Ghiran, I; Silverman, MG; Meng, XM; Kitchen, R; Xu, JH; Van Keuren-Jensen, K; Shah, R; Xiao, JJ; Das, S (2021) Mir-30d Regulates Cardiac Remodeling by Intracellular and Paracrine Signaling. *Circ Res* 128:E1-E23. doi:10.1161/CIRCRESAHA.120.317244
347. Liu, MM; Yan, M; He, JL; Lv, HZ; Chen, ZP; Peng, LY; Cai, WB; Yao, F; Chen, C; Shi, L; Zhang, K; Zhang, X; Wang, DW; Wang, L; Zhu, Y; Ai, D (2021) Macrophage MST1/2 Disruption Impairs Post-Infarction Cardiac Repair via LTB4. *Circ Res* 129:909-926. doi:10.1161/CIRCRESAHA.121.319687
348. Patil, M; Saheera, S; Dubey, PK; Kahn-Krell, A; Govindappa, PK; Singh, S; Tousif, S; Zhang, QK; Lal, H; Zhang, JY; Qin, GJ; Krishnamurthy, P (2021) Novel Mechanisms of Exosome-Mediated Phagocytosis of Dead Cells in Injured Heart. *Circ Res* 129:1006-1020. doi:10.1161/CIRCRESAHA.120.317900

349. Shi, HR; Gao, Y; Dong, Z; Yang, JE; Gao, RF; Li, X; Zhang, SQ; Ma, LL; Sun, XL; Wang, Z; Zhang, F; Hu, K; Sun, AJ; Ge, JB (2021) GSDMD-Mediated Cardiomyocyte Pyroptosis Promotes Myocardial I/R Injury. *Circ Res* 129:383-396. doi:10.1161/CIRCRESAHA.120.318629
350. Song, Y; Xu, CJ; Liu, JF; Li, YL; Wang, H; Shan, D; Wainer, IW; Hu, XL; Zhang, Y; Woo, AYH; Xiao, RP (2021) Heterodimerization With 5-HT<sub>2B</sub> Is Indispensable for beta(2)AR-Mediated Cardioprotection. *Circ Res* 128:262-277. doi:10.1161/CIRCRESAHA.120.317011
351. Xie, M; Cho, GW; Kong, YL; Li, DL; Altamirano, F; Luo, X; Morales, CR; Jiang, N; Schiattarella, GG; May, HI; Medina, J; Shelton, JM; Ferdous, A; Gillette, TG; Hill, JA (2021) Activation of Autophagic Flux Blunts Cardiac Ischemia/Reperfusion Injury. *Circ Res* 129:435-450. doi:10.1161/CIRCRESAHA.120.318601
352. Zhang, QJ; He, Y; Li, YN; Shen, HL; Lin, L; Zhu, M; Wang, ZN; Luo, X; Hill, JA; Cao, D; Luo, RL; Zou, R; McAnally, J; Liao, J; Bajona, P; Zang, QS; Yu, YH; Liu, ZP (2021) Matricellular Protein Cilp1 Promotes Myocardial Fibrosis in Response to Myocardial Infarction. *Circ Res* 129:1021-1035. doi:10.1161/CIRCRESAHA.121.319482
353. He, HM; Mulhern, RM; Oldham, WM; Xiao, WS; Lin, YD; Liao, R; Loscalzo, J (2022) L-2-Hydroxyglutarate Protects Against Cardiac Injury via Metabolic Remodeling. *Circ Res* 131:562-579. doi:10.1161/CIRCRESAHA.122.321227
354. Lv, FX; Wang, YF; Shan, D; Guo, SL; Chen, GJ; Jin, L; Zheng, W; Feng, H; Zeng, XH; Zhang, S; Zhang, Y; Hu, XL; Xiao, RP (2022) Blocking MG53(S255) Phosphorylation Protects Diabetic Heart From Ischemic Injury. *Circ Res* 131:962-976. doi:10.1161/CIRCRESAHA.122.321055
355. Nakayama, Y; Mukai, N; Kreitzer, G; Patwari, P; Yoshioka, J (2022) Interaction of ARRDC4 With GLUT1 Mediates Metabolic Stress in the Ischemic Heart. *Circ Res* 131:510-527. doi:10.1161/CIRCRESAHA.122.321351
356. Ni, C; Chen, YJ; Xu, YC; Zhao, J; Li, QJ; Xiao, CC; Wu, Y; Wang, JY; Wang, YC; Zhong, ZW; Zhang, L; Wu, RR; Liu, QN; Wu, XP; Ke, CL; Zhu, W; Chen, JH; Huang, JJ; Wang, YB; Wang, JN; Hu, XY (2022) FMO2 (Flavin Containing Monooxygenase 2) Prevents Cardiac Fibrosis via CYP2J3-SMURF2 Axis. *Circ Res* 131:189-206. doi:10.1161/CIRCRESAHA.122.320538
357. Pei, JQ; Cai, L; Wang, F; Xu, CS; Pei, SQ; Guo, HW; Sun, XG; Chun, J; Cong, XF; Zhu, WQ; Zheng, Z; Chen, X (2022) LPA(2) Contributes to Vascular Endothelium Homeostasis and Cardiac Remodeling After Myocardial Infarction. *Circ Res* 131:388-403. doi:10.1161/CIRCRESAHA.122.321036
358. Prag, HA; Aksentijevic, D; Dannhorn, A; Giles, AV; Mulvey, JF; Sauchanka, O; Du, LP; Bates, G; Reinhold, J; Kula-Alwar, D; Xu, ZL; Pellerin, L; Goodwin, RJA; Murphy, MP; Krieg, T (2022) Ischemia-Selective Cardioprotection by Malonate for Ischemia/Reperfusion Injury. *Circ Res* 131:528-541. doi:10.1161/CIRCRESAHA.121.320717
359. Wan, Q; Xu, CS; Zhu, LY; Zhang, YZ; Peng, ZK; Chen, H; Rao, HJ; Zhang, EL; Wang, HY; Chu, F; Ning, X; Yang, XJ; Yuan, JQ; Wu, YJ; Huang, Y; Hu, SS; Liu, DP; Wang, M (2022) Targeting PDE4B (Phosphodiesterase-4 Subtype B) for Cardioprotection in Acute Myocardial Infarction via Neutrophils and Microcirculation. *Circ Res* 131:442-455. doi:10.1161/CIRCRESAHA.122.321365
360. Xiao, HW; Zhang, MY; Wu, H; Wu, JX; Hu, XX; Pei, XY; Li, DY; Zhao, L; Hua, Q; Meng, B; Zhang, XW; Peng, LL; Cheng, XL; Li, ZY; Yang, WQ; Zhang, Q; Zhang, Y; Lu, YJ; Pan, ZW (2022) CIRKIL Exacerbates Cardiac Ischemia/Reperfusion Injury by Interacting With Ku70. *Circ Res* 130:E3-E17. doi:10.1161/CIRCRESAHA.121.318992
361. Young, A; Bradley, LA; Farrar, E; Bilcheck, HO; Tkachenko, S; Saucerman, JJ; Bekiranov, S; Wolf, MJ (2022) Inhibition of DYRK1a Enhances Cardiomyocyte Cycling After Myocardial Infarction. *Circ Res* 130:1345-1361. doi:10.1161/CIRCRESAHA.121.320005
362. Zhao, H; Chen, XY; Hu, GY; Li, CY; Guo, LY; Zhang, L; Sun, FF; Xia, YL; Yan, WJ; Cui, Z; Guo, YZ; Guo, X; Huang, C; Fan, MM; Wang, S; Zhang, FY; Tao, L (2022) Small Extracellular Vesicles From Brown Adipose Tissue Mediate Exercise Cardioprotection. *Circ Res* 130:1490-1506. doi:10.1161/CIRCRESAHA.121.320458
363. Cannavo, A; Jun, SH; Rengo, G; Marzano, F; Agrimi, J; Liccardo, D; Elia, A; Keceli, G; Altobelli, GG; Marcucci, L; Megighian, A; Gao, ER; Feng, N; Kammers, K; Ferrara, N; FiNOS, L; Koch, WJ; Paolocci, N (2023) & beta;3AR-Dependent Brain-Derived Neurotrophic Factor (BDNF) Generation Limits Chronic Postischemic Heart Failure. *Circ Res* 132:867-881. doi:10.1161/CIRCRESAHA.122.321583

364. Enzan, N; Matsushima, S; Ikeda, S; Okabe, K; Ishikita, A; Yamamoto, T; Sada, M; Miyake, R; Tsutsui, Y; Nishimura, R; Toyohara, T; Ikeda, Y; Shojima, Y; Miyamoto, HD; Tadokoro, T; Ikeda, M; Abe, K; Ide, T; Kinugawa, S; Tsutsui, H (2023) ZBP1 Protects Against mtDNA-Induced Myocardial Inflammation in Failing Hearts. *Circ Res* 132:1110-1126. doi:10.1161/CIRCRESAHA.122.322227
365. Hume, RD; Kanagalingam, S; Deshmukh, T; Chen, S; Mithieux, SM; Rashid, FN; Roohani, I; Lu, J; Doan, T; Graham, D; Clayton, ZE; Slaughter, E; Kizana, E; Stempien-Otero, AS; Brown, P; Thomas, L; Weiss, AS; Chong, JJH (2023) Tropoelastin Improves Post-Infarct Cardiac Function. *Circ Res* 132:72-86. doi:10.1161/CIRCRESAHA.122.321123
366. Ichihara, G; Katsumata, Y; Sugiura, Y; Matsuoka, Y; Maeda, R; Endo, J; Anzai, A; Shirakawa, K; Moriyama, H; Kitakata, H; Hiraide, T; Goto, S; Ko, S; Iwasawa, Y; Sugai, K; Daigo, K; Goto, S; Sato, K; Yamada, K; Suematsu, M; Ieda, M; Sano, M (2023) MRP1-Dependent Extracellular Release of Glutathione Induces Cardiomyocyte Ferroptosis After Ischemia-Reperfusion. *Circ Res* 133:861-876. doi:10.1161/CIRCRESAHA.123.323517
367. Marti-Pamies, I; Thoonen, R; Morley, M; Graves, L; Tamez, J; Caplan, A; McDaid, K; Yao, VC; Hindle, A; Gerszten, RE; Farrell, LA; Li, L; Tseng, YH; Profeta, G; Buys, ES; Bloch, DB; Scherrer-Crosbie, M (2023) Brown Adipose Tissue and BMP3b Decrease Injury in Cardiac Ischemia-Reperfusion. *Circ Res* 133:353-365. doi:10.1161/CIRCRESAHA.122.322337
368. Schutte, JP; Manke, MC; Hemmen, K; Munzer, P; Schorg, BF; Ramos, GC; Pogoda, M; Dicenta, V; Hoffmann, SHL; Pinnecker, J; Kollotzek, F; Zdanyte, M; Mueller, KAL; Singh, Y; Mack, AF; Pichler, B; Lang, F; Nieswandt, B; Gawaz, M; Heinze, KG; Casadei, N; Borst, O (2023) Platelet-Derived MicroRNAs Regulate Cardiac Remodeling After Myocardial Ischemia. *Circ Res* 132:E96-E113. doi:10.1161/CIRCRESAHA.122.322459
369. Sun, JC; Wang, L; Matthews, RC; Walcott, GP; Lu, YA; Wei, YH; Zhou, Y; Zangi, L; Zhang, JY (2023) CCND2 Modified mRNA Activates Cell Cycle of Cardiomyocytes in Hearts With Myocardial Infarction in Mice and Pigs. *Circ Res* 133:484-504. doi:10.1161/CIRCRESAHA.123.322929
370. Sun, YX; Ma, MQ; Cao, DD; Zheng, AC; Zhang, YY; Su, Y; Wang, JF; Xu, YH; Zhou, M; Tang, YS; Liu, YF; Ma, T; Fan, AY; Zhang, XY; Zhu, QL; Qin, JC; Mo, CY; Xu, YW; Zhang, L; Xu, DC; Yue, R (2023) Inhibition of Fap Promotes Cardiac Repair by Stabilizing BNP. *Circ Res* 132:586-600. doi:10.1161/CIRCRESAHA.122.320781
371. Yang, Y; Zhang, Y; Yang, JQ; Zhang, MM; Tian, T; Jiang, Y; Liu, XN; Xue, GL; Li, XD; Zhang, XF; Li, SX; Huang, X; Li, Z; Guo, Y; Zhao, LX; Bao, HR; Zhou, ZW; Song, JH; Yang, GH; Xuan, LA; Shan, HL; Zhang, ZR; Lu, YJ; Yang, BF; Pan, ZW (2023) Interdependent Nuclear Co-Trafficking of ASPP1 and p53 Aggravates Cardiac Ischemia/Reperfusion Injury. *Circ Res* 132:208-222. doi:10.1161/CIRCRESAHA.122.321153
